# Supplementary material for: Characterization of the Verticillium dahliae Exoproteome Involves in Pathogenicity from Cotton-Containing Medium
Source: Front Microbiol. 2016 Oct 28;7:1709. doi: 10.3389/fmicb.2016.01709 (PMC5083787; doi:10.3389/fmicb.2016.01709)
Supplement: Supplementary file 1 [file Data_Sheet_1.XLSX]

## Sheet: Sheet1
Table S1 The LC-MS/MS identification results of induced exoproteome of Vd991 strain
Gene-ID	Protein Length	Mathcing parametres
		Score	Coverage	Proteins	Unique Peptides	Peptides	Peptide-spectrum match
VEDA_00021	218	85.56	0.2523	1	4	4	8
VEDA_00005	177	71.45	0.1525	1	2	2	4
VEDA_00007	184	251.72	0.3913	1	5	5	19
VEDA_00010	307	22.35	0.0489	1	1	1	4
VEDA_01223	1040	51.35	0.0231	1	2	2	3
VEDA_00024	316	120.52	0.0633	1	2	2	2
VEDA_00080	118	274.13	0.4322	1	5	5	85
VEDA_00057	605	56.82	0.0281	1	2	2	2
VEDA_00069	846	71.95	0.026	1	2	2	2
VEDA_00070	432	33.88	0.0394	1	1	1	1
VEDA_04899	708	418.09	0.2218	1	14	14	24
VEDA_00073	1170	20.43	0.012	1	1	1	2
VEDA_00108	72	82.15	0.2917	1	2	2	27
VEDA_07125	302	38.44	0.0662	1	1	1	1
VEDA_00181	560	553.04	0.4696	2	19	19	44
VEDA_00115	438	288.39	0.2329	1	9	9	22
VEDA_00130	1476	45.72	0.0047	1	1	1	3
VEDA_03273	63	128.1	0.3016	2	3	3	14
VEDA_03717	1077	1350.36	0.4364	1	33	33	102
VEDA_01174	463	419.89	0.3434	1	12	12	22
VEDA_00141	623	59.86	0.0433	1	2	2	2
VEDA_00152	483	969.01	0.5135	1	22	23	204
VEDA_00153	398	308.22	0.1658	1	6	6	20
VEDA_00168	584	152.41	0.0959	1	4	4	6
VEDA_04938	389	117.88	0.1645	1	4	5	15
VEDA_04446	391	181.45	0.2225	1	6	7	19
VEDA_03867	492	81.55	0.061	1	3	3	4
VEDA_00188	421	174.43	0.1164	1	3	4	13
VEDA_03353	260	73.63	0.0846	1	1	1	1
VEDA_00203	1415	44.79	0.0163	1	1	1	1
VEDA_00210	212	134.47	0.2217	1	4	4	13
VEDA_00211	315	154.68	0.1937	1	5	5	9
VEDA_00218	428	96.7	0.0864	1	3	3	6
VEDA_00132	121	159	0.4298	1	6	6	20
VEDA_00133	153	392.5	0.6275	3	10	11	336
VEDA_00235	367	166.19	0.0872	1	2	2	2
VEDA_00243	439	107.47	0.0683	1	2	2	4
VEDA_00245	989	41.55	0.0162	1	2	2	2
VEDA_00250	807	38.67	0.0186	1	1	1	1
VEDA_00136	667	1161.88	0.4588	1	22	22	340
VEDA_00252	1005	49.69	0.0239	1	1	1	1
VEDA_08114	366	370.88	0.3634	1	12	12	34
VEDA_04028	416	207.44	0.2885	1	8	8	11
VEDA_00270	386	23.39	0.0311	1	1	1	1
VEDA_00278	266	26.47	0.0564	1	1	1	1
VEDA_00294	400	585.83	0.515	1	14	14	66
VEDA_09466	414	35.46	0.0604	1	2	2	2
VEDA_00299	545	37.18	0.0294	1	1	1	1
VEDA_04070	362	340.48	0.3785	1	10	10	25
VEDA_00307	356	143.09	0.1039	1	3	3	4
VEDA_00176	611	396.69	0.1735	1	9	9	36
VEDA_00312	211	50.16	0.1564	1	3	3	4
VEDA_00315	76	46.14	0.2763	1	2	2	4
VEDA_00328	181	33.9	0.0663	1	1	1	1
VEDA_00338	539	494	0.3581	1	14	14	39
VEDA_00233	106	283.13	0.5283	1	9	9	60
VEDA_00351	1557	139.33	0.0276	1	2	3	3
VEDA_00355	341	111.15	0.0909	1	2	2	3
VEDA_00251	348	153.54	0.319	1	7	7	19
VEDA_00365	353	51.88	0.1076	1	2	2	2
VEDA_00368	543	43.91	0.0552	1	2	2	2
VEDA_00369	475	35.92	0.0442	1	2	2	2
VEDA_00376	287	31.82	0.0348	1	1	1	2
VEDA_00377	486	68	0.0864	1	3	3	4
VEDA_00392	521	45.6	0.048	1	2	2	3
VEDA_00253	236	150.28	0.2119	1	3	3	14
VEDA_00399	390	65.25	0.1231	1	3	3	3
VEDA_00296	623	133.8	0.0658	1	4	5	7
VEDA_00406	240	35.95	0.05	1	1	1	1
VEDA_00419	809	58.75	0.021	1	2	2	5
VEDA_06522	95	88.23	0.2316	1	2	2	17
VEDA_00301	123	312.59	0.5285	1	10	10	36
VEDA_02584	301	83.05	0.113	1	3	3	4
VEDA_00310	462	189.61	0.1775	1	6	6	24
VEDA_00433	1089	112.01	0.0257	1	2	2	2
VEDA_00361	160	243.06	0.4688	1	8	8	62
VEDA_00435	609	203.89	0.1412	1	7	7	11
VEDA_00398	324	476.82	0.4969	1	14	14	35
VEDA_00441	663	39.19	0.0196	1	1	1	1
VEDA_00404	174	412.08	0.5287	1	11	11	75
VEDA_00443	796	57.12	0.0603	1	3	3	4
VEDA_00459	138	67.26	0.1087	1	1	1	4
VEDA_00428	614	1474.99	0.6433	2	32	32	313
VEDA_03361	140	45.63	0.1214	1	2	2	3
VEDA_00430	340	279.55	0.2618	1	5	5	12
VEDA_00476	581	52.2	0.0534	1	2	2	2
VEDA_00477	220	25.47	0.0455	1	1	1	2
VEDA_02253	245	524.36	0.5143	1	13	14	66
VEDA_01753	68	159.65	0.3676	2	3	3	29
VEDA_00463	318	762.85	0.6164	1	14	14	194
VEDA_00520	229	59.64	0.0524	1	1	1	1
VEDA_00517	1684	560.44	0.133	1	15	15	38
VEDA_00540	883	591.18	0.2525	1	17	17	29
VEDA_02061	386	229.19	0.2358	1	6	7	16
VEDA_00547	714	495.42	0.3375	1	14	14	30
VEDA_00550	589	183.33	0.0764	1	4	4	7
VEDA_00554	587	84.76	0.0886	1	4	4	7
VEDA_08046	502	65.44	0.0896	1	3	3	4
VEDA_00572	271	285.95	0.3542	1	9	9	15
VEDA_00573	351	188.13	0.2165	1	5	5	17
VEDA_02397	291	239.24	0.4364	1	9	9	13
VEDA_00582	1177	22.99	0.0102	1	1	1	1
VEDA_00591	1062	120.04	0.0245	1	2	2	3
VEDA_00949	356	36.61	0.0478	1	1	1	1
VEDA_00222	337	29.54	0.0534	1	1	1	1
VEDA_00600	166	72.52	0.1687	1	3	3	8
VEDA_00623	124	68.34	0.25	1	3	3	6
VEDA_00624	1260	68.34	0.0183	1	2	2	2
VEDA_00625	517	34.81	0.0348	1	1	1	1
VEDA_04468	312	392	0.359	1	9	9	76
VEDA_00644	1103	110.95	0.0263	1	2	2	2
VEDA_00646	333	302.07	0.3333	1	11	11	21
VEDA_00544	433	982.19	0.6513	1	24	24	133
VEDA_00570	100	160.77	0.41	1	4	4	50
VEDA_00666	294	130.77	0.1395	1	4	4	6
VEDA_00679	531	117.35	0.0659	1	3	3	5
VEDA_00681	291	90.25	0.1581	1	3	3	4
VEDA_00684	366	274.12	0.2104	1	7	7	15
VEDA_00691	387	428.27	0.3049	1	9	10	28
VEDA_00692	905	26.59	0.0177	1	1	1	1
VEDA_00578	141	361.57	0.5248	1	7	9	43
VEDA_02049	198	91.67	0.1515	1	2	2	4
VEDA_00596	527	1061.69	0.63	1	27	27	215
VEDA_00709	372	514.53	0.4892	1	15	15	53
VEDA_00597	219	131.2	0.1598	1	3	3	18
VEDA_00719	292	21.04	0.0548	1	1	1	1
VEDA_00720	248	28.53	0.0524	1	1	1	2
VEDA_00723	507	31.99	0.0651	1	2	2	2
VEDA_00643	610	315.69	0.3	1	13	13	22
VEDA_07999	186	284.88	0.5484	1	8	8	30
VEDA_00730	870	95.67	0.0563	1	4	4	5
VEDA_00733	202	24.12	0.0693	1	1	1	2
VEDA_00647	900	412.46	0.1711	1	13	13	25
VEDA_00743	273	28.47	0.0293	1	1	1	3
VEDA_00744	127	46.14	0.2205	1	2	2	4
VEDA_00659	312	433.26	0.5064	1	14	14	83
VEDA_00747	489	112.03	0.0654	1	3	3	3
VEDA_00760	225	33.1	0.0889	1	1	1	3
VEDA_00766	170	40.15	0.0824	1	1	1	3
VEDA_00770	160	253.79	0.4875	1	8	8	19
VEDA_00774	712	195.69	0.0983	1	7	7	8
VEDA_00778	1404	35.9	0.0093	1	1	1	1
VEDA_00779	436	31.12	0.0298	1	1	1	1
VEDA_00780	696	21.71	0.0086	1	1	1	1
VEDA_00786	231	81.25	0.1732	1	4	4	5
VEDA_00694	294	211.39	0.2211	1	5	5	29
VEDA_00791	200	23.87	0.045	1	1	1	1
VEDA_00797	225	52.4	0.0844	1	1	1	1
VEDA_00798	496	22.05	0.0222	1	1	1	1
VEDA_00804	785	584.21	0.2573	1	15	15	28
VEDA_00806	1368	547.5	0.1871	1	22	22	32
VEDA_00818	424	95.35	0.1745	1	3	3	6
VEDA_09361	698	73.97	0.0229	1	2	2	4
VEDA_03616	211	283.38	0.2749	1	7	7	33
VEDA_00700	322	253.79	0.3106	1	8	8	19
VEDA_00870	816	362.07	0.1397	1	9	10	17
VEDA_00877	623	21.14	0.0112	1	1	1	1
VEDA_00879	454	400.63	0.3018	1	6	10	20
VEDA_00883	1020	117.73	0.052	1	4	4	4
VEDA_02996	136	185.17	0.4265	1	7	7	28
VEDA_03324	444	417.55	0.25	1	11	11	26
VEDA_00707	442	598.35	0.4502	1	16	16	34
VEDA_00902	373	39.18	0.0295	1	1	1	2
VEDA_00907	229	113.44	0.2664	1	4	4	6
VEDA_00913	490	250.5	0.251	1	10	10	22
VEDA_00919	422	63.62	0.0924	1	3	3	4
VEDA_00920	643	239.91	0.126	1	5	5	7
VEDA_00924	401	25.79	0.0449	1	1	1	1
VEDA_00925	371	25.58	0.035	1	1	1	1
VEDA_00928	464	83.26	0.0927	1	3	3	4
VEDA_00934	1346	23.68	0.0074	1	1	1	2
VEDA_00715	1042	914.13	0.2514	1	18	18	64
VEDA_00948	209	110.4	0.2201	1	3	3	4
VEDA_00729	447	613.1	0.4586	1	17	18	52
VEDA_00951	572	33.07	0.0192	1	1	1	1
VEDA_04803	395	178.61	0.1468	1	3	3	17
VEDA_00953	333	59.25	0.0931	1	2	2	4
VEDA_00959	1277	121.13	0.0431	1	4	4	5
VEDA_00960	394	199.12	0.2132	1	7	7	12
VEDA_00966	126	50.21	0.1746	1	2	2	3
VEDA_00980	372	91.97	0.086	1	3	3	4
VEDA_00982	670	142.12	0.0791	1	4	4	5
VEDA_00984	1364	127.15	0.0594	1	5	5	5
VEDA_01001	269	263	0.2491	1	7	7	15
VEDA_00741	161	564.81	0.5901	1	12	12	82
VEDA_00787	697	836.03	0.3329	2	19	21	63
VEDA_01014	1726	29.9	0.0151	1	2	2	3
VEDA_01026	567	78.88	0.0635	1	3	3	5
VEDA_00821	352	1148.92	0.696	1	24	24	223
VEDA_01034	478	64.66	0.0481	1	2	2	4
VEDA_00841	376	266.57	0.2819	1	9	9	18
VEDA_01042	174	56.81	0.1034	1	2	2	5
VEDA_00895	325	152.25	0.1785	1	4	4	10
VEDA_01058	157	44.36	0.1529	1	2	2	4
VEDA_01059	260	127.23	0.1654	1	3	3	4
VEDA_00947	375	812.74	0.672	1	18	18	141
VEDA_01070	704	130.6	0.0838	1	5	5	6
VEDA_01075	923	95.19	0.0336	1	3	3	3
VEDA_01078	398	79.45	0.0653	1	3	3	3
VEDA_01030	210	91.29	0.1429	1	2	2	3
VEDA_01039	407	544.18	0.484	1	19	19	111
VEDA_01088	472	632.25	0.4025	1	14	14	59
VEDA_01089	1588	29.67	0.0063	1	1	1	1
VEDA_01091	187	44.91	0.107	1	1	1	1
VEDA_01055	452	938.23	0.4735	1	20	20	213
VEDA_01068	551	240.02	0.216	1	8	8	28
VEDA_04750	294	160.29	0.1973	1	4	4	21
VEDA_01134	163	65.17	0.1288	1	2	2	2
VEDA_01080	166	102.89	0.3614	1	4	4	6
VEDA_01144	695	63.36	0.0489	1	3	3	3
VEDA_01150	365	91.01	0.1151	1	3	3	5
VEDA_04130	415	45.31	0.0337	1	2	2	2
VEDA_01152	352	53.87	0.0739	1	2	2	2
VEDA_01156	815	249.8	0.1092	1	8	8	9
VEDA_01157	414	142.68	0.1667	1	3	3	3
VEDA_01087	405	453.02	0.3481	1	12	13	38
VEDA_09572	174	62.64	0.1494	1	2	2	5
VEDA_01166	154	33.18	0.0714	1	1	1	2
VEDA_01171	819	63.57	0.0305	1	2	2	2
VEDA_01172	322	37.89	0.059	1	2	2	2
VEDA_07933	772	1528.03	0.4404	1	27	30	876
VEDA_06803	548	260.28	0.2062	1	9	9	30
VEDA_01095	256	603.27	0.6172	1	15	15	125
VEDA_05090	599	60.82	0.0618	1	3	3	3
VEDA_01202	526	33.74	0.0304	1	1	1	1
VEDA_04805	455	187.92	0.2242	1	8	8	13
VEDA_01214	200	79.34	0.19	1	3	3	3
VEDA_01219	332	154.72	0.2259	1	6	6	10
VEDA_01222	853	245.28	0.0891	1	6	6	13
VEDA_06357	188	133.24	0.3138	1	3	3	10
VEDA_01118	295	59.2	0.0712	1	2	2	9
VEDA_01243	510	83.78	0.0882	1	3	3	6
VEDA_01244	438	76.32	0.0571	1	3	3	5
VEDA_07406	150	252.74	0.4267	1	7	7	62
VEDA_01276	145	291.46	0.5448	1	7	8	21
VEDA_04713	203	334.2	0.4236	1	7	7	35
VEDA_01285	286	34.71	0.0455	1	1	1	4
VEDA_01880	820	102.7	0.0732	1	5	5	8
VEDA_01106	298	367.85	0.3456	1	9	9	62
VEDA_01294	253	50.02	0.17	1	3	3	4
VEDA_01298	422	533.76	0.436	1	14	14	32
VEDA_03465	389	135.99	0.1105	1	3	3	6
VEDA_01324	335	108.55	0.1433	1	4	4	5
VEDA_01325	373	356.91	0.3378	1	10	10	40
VEDA_01330	606	42.94	0.0198	1	1	1	1
VEDA_01345	325	169.44	0.1969	1	5	5	8
VEDA_01346	520	28.81	0.0385	1	1	1	1
VEDA_01141	417	1197.72	0.6403	1	26	26	274
VEDA_01367	363	66.07	0.1157	1	3	3	6
VEDA_01368	373	91.2	0.0777	1	2	2	3
VEDA_02632	135	102.01	0.163	1	2	2	26
VEDA_00072	447	24.15	0.0157	1	1	1	1
VEDA_05180	473	87.53	0.0613	1	2	2	10
VEDA_08664	226	294.48	0.4558	1	8	8	37
VEDA_01399	577	122.78	0.0711	1	4	4	8
VEDA_05564	347	256.44	0.3314	1	7	7	38
VEDA_01405	543	101.3	0.0645	1	3	3	5
VEDA_01410	650	70.08	0.04	1	2	3	4
VEDA_03678	409	155.04	0.1711	1	4	4	4
VEDA_01413	853	251.6	0.17	1	9	9	10
VEDA_04455	423	267.89	0.1773	1	7	7	25
VEDA_01424	210	114.31	0.2619	1	4	4	4
VEDA_01425	749	57.37	0.0334	1	2	2	2
VEDA_01430	276	125.66	0.3297	1	5	5	6
VEDA_05112	517	121.03	0.0774	1	3	3	5
VEDA_01443	385	165.07	0.1351	1	4	4	6
VEDA_09372	211	310.16	0.4976	1	8	8	32
VEDA_01446	1396	64	0.0215	1	2	2	2
VEDA_01151	449	1399.35	0.6303	1	27	27	399
VEDA_01451	415	279.8	0.3205	1	8	8	15
VEDA_01453	570	447	0.2912	1	11	12	30
VEDA_01456	413	121.21	0.1283	1	4	4	4
VEDA_01457	60	33.94	0.2	1	1	1	1
VEDA_01162	427	230.73	0.1522	1	5	5	30
VEDA_01463	383	352.12	0.3812	1	12	12	22
VEDA_01466	1209	24.41	0.0083	1	1	1	1
VEDA_01467	1635	33.57	0.0104	1	1	1	1
VEDA_01184	113	172.41	0.5664	1	4	4	52
VEDA_01473	465	132.23	0.1484	1	5	5	7
VEDA_01210	693	422.72	0.3449	1	15	15	31
VEDA_01479	287	51.37	0.1045	1	2	2	2
VEDA_01486	291	90.35	0.1581	1	3	3	4
VEDA_01489	333	115.39	0.1141	1	3	3	7
VEDA_01275	699	611.65	0.3433	1	22	22	73
VEDA_01499	876	111.56	0.0605	1	4	4	6
VEDA_00259	956	633.09	0.25	1	21	21	37
VEDA_01504	411	89.93	0.0852	1	2	2	2
VEDA_01506	482	98.28	0.1245	1	4	4	7
VEDA_00535	358	44.21	0.0587	1	2	2	2
VEDA_01517	352	25.74	0.0483	1	1	1	1
VEDA_01518	223	126.02	0.2018	1	5	5	8
VEDA_01521	698	563.61	0.2923	1	14	14	32
VEDA_01531	388	85.71	0.0876	1	3	3	6
VEDA_01532	607	28.89	0.0231	1	1	1	1
VEDA_01548	302	33.15	0.0563	1	1	1	2
VEDA_05899	236	349.85	0.4915	1	10	10	34
VEDA_01289	271	196.78	0.2103	1	6	6	22
VEDA_01560	878	55.97	0.0285	1	2	2	4
VEDA_01566	650	47.99	0.0123	1	1	1	1
VEDA_01572	492	33.83	0.0183	1	1	1	1
VEDA_01576	349	79.49	0.1289	1	3	3	6
VEDA_01581	334	233.61	0.2695	1	7	7	17
VEDA_01314	1069	127.88	0.0318	1	3	3	6
VEDA_01366	751	904.59	0.3635	1	19	19	223
VEDA_01594	373	215.43	0.252	1	7	7	15
VEDA_01602	681	27.39	0.0191	1	1	1	1
VEDA_01610	1263	10.23	0.0055	1	1	1	1
VEDA_01617	415	42.85	0.0819	1	2	2	2
VEDA_01621	775	205.1	0.1277	1	7	7	9
VEDA_01624	123	196.91	0.5772	1	5	5	6
VEDA_00852	664	35.42	0.0286	2	1	2	12
VEDA_01633	283	61.63	0.106	1	2	2	3
VEDA_01636	610	34.23	0.0426	1	2	2	2
VEDA_01642	328	53.1	0.0396	1	1	1	1
VEDA_01382	377	329.01	0.252	1	6	6	34
VEDA_01648	179	148.18	0.3073	1	4	4	15
VEDA_01389	465	329.47	0.1871	1	6	6	42
VEDA_01657	152	15.08	0.0461	1	1	1	1
VEDA_01658	438	180.06	0.1575	1	5	5	10
VEDA_01662	4347	52.51	0.0041	1	1	1	1
VEDA_01668	484	160.73	0.1012	1	2	2	3
VEDA_01670	288	49.9	0.0313	1	1	1	1
VEDA_01676	721	28.14	0.0125	1	1	1	2
VEDA_01681	104	244.89	0.7308	1	7	7	69
VEDA_01683	398	70.97	0.103	1	4	4	5
VEDA_01395	422	149.4	0.1066	1	3	3	10
VEDA_08848	306	151.57	0.1438	1	3	3	35
VEDA_01712	609	72.47	0.0378	1	2	2	3
VEDA_01436	533	973.01	0.5066	3	17	17	838
VEDA_02653	391	432.8	0.3223	1	8	8	158
VEDA_01730	619	83.7	0.0953	1	3	3	4
VEDA_01731	672	1059.83	0.4658	1	25	25	155
VEDA_03957	914	47.96	0.0208	1	1	1	1
VEDA_01744	955	38.07	0.0199	1	1	1	3
VEDA_05551	585	29.77	0.0205	1	1	1	1
VEDA_01458	397	479.05	0.3098	1	11	11	39
VEDA_01748	1037	250.05	0.108	1	9	9	18
VEDA_01749	401	136.87	0.0998	1	4	4	5
VEDA_01751	1788	36.18	0.0084	1	1	1	2
VEDA_07932	249	202.01	0.2892	1	6	6	22
VEDA_01495	490	494.99	0.2776	1	15	15	44
VEDA_01767	190	109.55	0.2474	1	4	4	6
VEDA_01769	94	57.81	0.1915	1	2	2	4
VEDA_01770	966	38.71	0.0155	1	1	1	1
VEDA_01784	480	21.8	0.025	1	1	1	1
VEDA_01786	491	40.02	0.0265	1	1	1	1
VEDA_01788	910	172.82	0.0967	1	7	7	7
VEDA_04471	1079	30.85	0.0195	1	1	1	2
VEDA_01794	1049	503.1	0.1964	1	16	16	30
VEDA_01800	533	33.45	0.0206	1	1	1	1
VEDA_07230	330	108.98	0.1273	1	3	3	7
VEDA_01812	239	68.58	0.0753	1	1	1	6
VEDA_01502	414	151.62	0.1256	1	4	4	33
VEDA_01817	662	44.98	0.0227	1	1	1	1
VEDA_01818	450	217.98	0.2333	1	7	7	11
VEDA_01819	258	268.46	0.3953	1	7	7	9
VEDA_01553	2101	1490.41	0.3222	2	50	50	120
VEDA_06332	494	160.81	0.1336	1	4	4	11
VEDA_08710	453	681.4	0.3532	1	18	18	132
VEDA_01855	562	626.9	0.3719	1	17	17	45
VEDA_01584	351	349.59	0.3704	1	10	10	71
VEDA_01881	373	28.71	0.0322	1	1	1	1
VEDA_01625	179	354.95	0.5084	1	11	11	39
VEDA_01887	334	66.2	0.0719	1	2	2	5
VEDA_01889	1097	29.26	0.0164	1	1	1	1
VEDA_01655	104	284.31	0.5865	1	6	6	59
VEDA_01686	389	647.8	0.4704	1	15	15	75
VEDA_01897	341	46.41	0.0645	1	1	1	2
VEDA_01902	389	133.35	0.0771	1	3	3	4
VEDA_01909	544	73.41	0.0533	1	2	2	2
VEDA_06446	349	25.57	0.0688	1	1	1	2
VEDA_01917	125	62.23	0.224	1	2	2	2
VEDA_01714	823	1659.79	0.5832	1	44	44	299
VEDA_01920	256	72.78	0.1133	1	2	3	3
VEDA_01928	283	32.99	0.0707	1	2	2	2
VEDA_01929	317	149.74	0.1893	1	5	5	10
VEDA_01720	382	572.33	0.466	1	16	16	66
VEDA_01932	142	77.52	0.2324	1	3	3	5
VEDA_01746	895	215.92	0.0749	1	4	4	35
VEDA_01747	113	368.79	0.9115	1	9	9	177
VEDA_01761	622	995.33	0.5129	1	21	21	156
VEDA_01791	722	1120.89	0.4765	2	32	33	134
VEDA_01945	276	426.3	0.442	1	9	9	16
VEDA_01946	106	143.7	0.3679	1	3	3	7
VEDA_01947	231	175.99	0.3117	1	5	5	14
VEDA_01804	161	375.53	0.6335	1	10	10	93
VEDA_01952	228	84.76	0.0877	1	2	2	5
VEDA_03272	591	458.88	0.2437	1	14	14	27
VEDA_01962	189	185.47	0.3175	1	3	3	9
VEDA_04197	339	336.27	0.3304	1	10	10	16
VEDA_04597	128	159.04	0.3203	1	3	3	18
VEDA_01976	286	37.81	0.0315	1	1	1	2
VEDA_01821	381	715.53	0.5748	1	16	16	111
VEDA_01988	1801	127.63	0.0455	1	5	5	6
VEDA_01990	223	41.18	0.0583	1	1	1	3
VEDA_01992	418	38.91	0.0407	1	1	1	1
VEDA_01894	319	531.52	0.4608	1	13	13	124
VEDA_02012	485	366.9	0.2639	1	9	9	15
VEDA_02014	461	64.13	0.0521	1	1	1	1
VEDA_01895	584	138.85	0.1353	1	7	7	12
VEDA_02022	725	32.04	0.0207	1	1	1	1
VEDA_02025	354	41.5	0.0311	1	1	1	1
VEDA_03552	173	436.58	0.6474	1	12	12	51
VEDA_02032	1094	226.43	0.0823	1	7	7	10
VEDA_08661	214	186.22	0.3458	1	6	6	10
VEDA_02039	358	157.83	0.1816	1	4	4	8
VEDA_02040	635	62.9	0.0315	1	2	2	3
VEDA_02045	219	143.41	0.3242	1	5	5	7
VEDA_02371	59	31.16	0.1525	1	1	1	5
VEDA_02054	159	35.79	0.0755	1	1	1	1
VEDA_02055	337	100.54	0.1187	1	3	4	7
VEDA_02057	468	740.48	0.4722	1	22	23	60
VEDA_07757	632	428.78	0.2389	1	14	14	39
VEDA_01913	685	1018.13	0.4204	1	26	26	211
VEDA_02072	341	87.79	0.129	1	3	3	3
VEDA_01930	109	204.95	0.5046	1	3	3	46
VEDA_02084	225	131.08	0.1689	1	3	3	4
VEDA_04900	605	65.54	0.0215	1	1	1	2
VEDA_09748	580	480.35	0.3328	1	14	14	30
VEDA_02098	349	261.3	0.1834	1	5	5	10
VEDA_02100	476	126.59	0.0672	1	2	2	3
VEDA_02101	546	118.84	0.1136	1	3	3	4
VEDA_01937	127	47.92	0.1811	1	2	2	8
VEDA_02106	321	52.64	0.0312	1	1	1	2
VEDA_01940	400	410.63	0.2275	1	6	7	258
VEDA_02120	580	35.53	0.0172	1	1	1	1
VEDA_02121	283	30.56	0.0389	1	1	1	1
VEDA_02129	476	318.45	0.25	1	9	9	17
VEDA_02133	552	92.58	0.1087	1	5	5	7
VEDA_02135	293	209.62	0.2423	1	5	5	139
VEDA_02136	264	27.42	0.0682	1	1	1	1
VEDA_01966	331	44.87	0.0876	1	2	2	2
VEDA_07010	247	34.05	0.0445	1	1	1	4
VEDA_02148	323	445.39	0.5449	1	12	12	38
VEDA_02155	353	21.8	0.034	1	1	1	1
VEDA_02165	1081	338.11	0.1008	1	8	8	10
VEDA_02170	151	92.87	0.2517	1	4	4	11
VEDA_02175	479	59.13	0.048	1	2	2	3
VEDA_01982	126	274.24	0.5635	1	7	7	50
VEDA_02188	617	108.21	0.094	1	5	5	5
VEDA_03761	351	138.09	0.1425	1	4	4	6
VEDA_02200	1029	98.99	0.0262	1	2	2	2
VEDA_02210	240	43.93	0.1375	1	2	2	2
VEDA_07793	170	58.26	0.1235	1	2	2	2
VEDA_02218	710	53.41	0.0183	1	1	1	2
VEDA_02219	546	49.49	0.0604	1	3	3	4
VEDA_02222	109	52.4	0.1009	1	1	1	2
VEDA_02223	337	121.78	0.1009	2	3	4	8
VEDA_02231	376	37.68	0.0399	1	1	1	1
VEDA_02233	319	30.23	0.0596	1	1	1	1
VEDA_02238	919	192.53	0.0947	1	7	7	8
VEDA_02093	640	1301.33	0.5734	1	30	31	211
VEDA_02242	457	469.96	0.3654	1	10	10	30
VEDA_02097	152	360.51	0.5987	1	9	9	91
VEDA_02105	106	85.59	0.1981	1	3	3	13
VEDA_02377	621	26.63	0.0225	1	1	1	1
VEDA_02256	313	47.8	0.0383	1	1	1	1
VEDA_02113	546	662.24	0.3516	1	15	15	118
VEDA_02282	364	118.2	0.1566	1	3	3	3
VEDA_02288	756	246.13	0.1336	1	8	8	11
VEDA_02291	450	217.35	0.1778	1	6	6	9
VEDA_02293	1240	96	0.0435	1	4	4	5
VEDA_02299	347	180.86	0.17	1	7	7	19
VEDA_02138	455	497.22	0.3253	1	14	14	44
VEDA_09236	587	389.03	0.2078	1	11	11	57
VEDA_02312	320	38.85	0.05	1	1	1	1
VEDA_02314	579	23.2	0.0121	1	1	1	1
VEDA_02318	573	20.56	0.0279	1	1	1	1
VEDA_02323	138	33.55	0.1594	1	1	1	1
VEDA_02215	682	217.22	0.1129	1	5	5	13
VEDA_02331	426	46.83	0.0822	1	3	3	3
VEDA_02346	555	202.24	0.1586	1	5	5	16
VEDA_02353	955	11.58	0.0115	1	1	1	1
VEDA_00424	193	41.14	0.0466	1	1	1	2
VEDA_02356	886	32.33	0.0135	1	1	1	1
VEDA_03133	425	528.19	0.2871	1	12	12	41
VEDA_02361	1068	366.53	0.1152	1	9	9	17
VEDA_02240	403	930.47	0.6154	1	24	24	160
VEDA_02246	444	128.87	0.0405	1	2	2	10
VEDA_02367	399	39.39	0.0526	1	1	2	2
VEDA_04208	169	72.17	0.1893	1	3	3	8
VEDA_02369	492	249.2	0.1789	1	9	9	10
VEDA_04365	1168	726.84	0.2457	1	23	25	51
VEDA_02376	511	443.78	0.2975	1	11	11	33
VEDA_08837	336	32.06	0.0387	1	1	1	1
VEDA_02252	110	384.32	0.6273	1	7	7	56
VEDA_02302	179	198.32	0.3799	1	3	3	125
VEDA_02396	483	28.41	0.0311	1	1	1	1
VEDA_02309	906	170.1	0.0905	1	7	7	9
VEDA_02364	176	82.4	0.2784	1	3	3	3
VEDA_02366	269	256.32	0.3457	1	6	6	174
VEDA_02407	211	105.25	0.1801	1	3	3	3
VEDA_02417	535	48.04	0.0299	1	1	2	16
VEDA_02429	527	30.54	0.0266	1	1	1	1
VEDA_03792	324	51.26	0.108	1	3	3	3
VEDA_02442	425	39.23	0.0329	1	1	1	1
VEDA_04552	391	174.11	0.1432	1	5	5	12
VEDA_02449	307	34.27	0.0358	1	1	1	1
VEDA_08009	193	51.68	0.1451	1	2	2	3
VEDA_08412	383	85.99	0.0627	1	2	2	3
VEDA_02457	275	105.02	0.2145	1	4	4	8
VEDA_02386	824	79.67	0.0255	1	3	3	7
VEDA_02461	762	915.96	0.3858	1	17	20	369
VEDA_02463	234	187.51	0.3248	1	5	5	14
VEDA_02390	385	142.88	0.1974	1	5	6	9
VEDA_02474	361	62.77	0.1136	1	3	3	4
VEDA_02478	391	567.41	0.5575	1	16	16	52
VEDA_02480	515	51.26	0.068	1	2	2	2
VEDA_03396	526	211.55	0.1407	1	5	5	21
VEDA_02489	350	56.1	0.06	1	1	1	3
VEDA_02497	382	427.72	0.4372	1	13	13	40
VEDA_02501	1886	87.47	0.0265	1	3	4	5
VEDA_02502	418	146.59	0.1148	1	4	4	9
VEDA_02399	472	171.56	0.1186	1	4	5	23
VEDA_01851	566	578.55	0.3905	1	16	16	43
VEDA_05218	293	36.07	0.058	1	1	1	1
VEDA_02535	388	194.27	0.1675	1	5	5	13
VEDA_02536	419	75.63	0.0525	1	2	2	2
VEDA_02441	796	1092.47	0.4497	1	23	23	147
VEDA_06161	361	36.41	0.0388	1	1	1	1
VEDA_02559	214	21.81	0.0561	1	1	1	1
VEDA_02444	376	276.87	0.1702	1	3	3	25
VEDA_02455	504	447.49	0.2798	1	9	9	36
VEDA_06856	557	625.41	0.465	1	18	18	40
VEDA_02456	399	213.68	0.2306	1	6	6	21
VEDA_02460	568	370.97	0.2764	1	9	9	29
VEDA_02637	302	89.36	0.1159	1	3	3	4
VEDA_09412	2516	222.53	0.0346	1	7	7	15
VEDA_06809	268	49.84	0.1045	1	2	2	3
VEDA_01003	684	150.06	0.0906	1	4	4	5
VEDA_01165	958	204.45	0.0626	1	5	5	6
VEDA_02656	134	140.09	0.291	1	2	3	49
VEDA_01417	464	451.82	0.2177	1	8	9	35
VEDA_05701	330	570.29	0.4606	1	11	11	66
VEDA_02674	508	718.82	0.4646	1	19	19	101
VEDA_02678	421	114.57	0.1283	1	4	4	10
VEDA_02689	242	76.4	0.1074	1	2	2	2
VEDA_02690	797	260.51	0.1292	1	9	9	12
VEDA_02691	216	62.21	0.1389	1	2	2	3
VEDA_02701	954	72.86	0.0262	1	2	2	6
VEDA_02702	355	87	0.0873	1	3	3	7
VEDA_03250	440	617.37	0.3295	1	13	13	132
VEDA_02717	263	105.48	0.1863	1	4	4	8
VEDA_02720	650	32.8	0.0246	1	1	1	1
VEDA_02738	596	70.06	0.0587	1	3	3	3
VEDA_02739	356	127.81	0.191	1	4	4	4
VEDA_02740	721	100.68	0.0888	1	4	4	10
VEDA_05273	153	295.9	0.5752	1	7	7	28
VEDA_02588	487	700.17	0.384	1	17	17	186
VEDA_02770	413	141.03	0.1308	1	4	4	8
VEDA_01814	130	20.58	0.0846	1	1	1	1
VEDA_02075	162	87.08	0.2901	1	2	2	5
VEDA_02796	310	404.22	0.4774	1	11	11	38
VEDA_05049	322	229.49	0.1429	1	3	3	14
VEDA_02810	192	109.74	0.276	1	4	4	6
VEDA_03701	1739	24.93	0.0046	1	1	1	2
VEDA_07810	543	21.73	0.0147	1	1	1	2
VEDA_02845	974	68.31	0.04	1	3	3	4
VEDA_02848	571	66.08	0.0455	1	1	2	10
VEDA_02861	193	61.83	0.1192	1	2	2	2
VEDA_02623	197	336.93	0.2944	1	8	8	84
VEDA_02870	275	100.49	0.1782	1	3	3	3
VEDA_02871	1198	183.51	0.0801	1	7	7	9
VEDA_02872	1468	50.99	0.0095	1	1	1	2
VEDA_02648	490	853.05	0.4469	1	16	17	342
VEDA_02887	495	21.32	0.0222	1	1	1	2
VEDA_06283	383	657.32	0.6554	1	15	15	229
VEDA_02894	382	205.01	0.2723	1	8	8	19
VEDA_02896	787	863.44	0.3151	1	23	24	79
VEDA_05550	520	169.84	0.1538	1	7	7	11
VEDA_02898	489	144.31	0.1247	1	4	4	5
VEDA_02899	97	48.38	0.2474	1	2	2	4
VEDA_02900	196	183.28	0.2908	1	4	4	8
VEDA_02902	1953	153.62	0.0358	1	5	5	5
VEDA_07187	371	77.43	0.1186	1	2	3	4
VEDA_02906	784	133.7	0.0969	1	5	5	5
VEDA_02927	219	53.89	0.1233	1	2	2	2
VEDA_02931	553	223.05	0.1646	1	7	7	12
VEDA_02934	153	46.13	0.0458	1	1	1	1
VEDA_02948	313	386.58	0.3578	1	9	9	30
VEDA_02950	378	43.59	0.0688	1	2	2	3
VEDA_02952	508	40.56	0.0256	1	1	1	1
VEDA_02958	756	150.54	0.0794	1	4	4	5
VEDA_02960	208	148.12	0.2548	2	2	4	11
VEDA_02966	273	179.85	0.3223	1	6	6	10
VEDA_02975	361	345.22	0.3158	1	9	9	30
VEDA_02976	314	475.63	0.3376	1	9	9	22
VEDA_02978	524	33.86	0.0515	1	2	2	2
VEDA_02981	292	127.35	0.1678	1	4	4	6
VEDA_02992	858	95.56	0.0408	1	2	2	4
VEDA_02993	228	93.25	0.0965	1	2	2	3
VEDA_05215	502	29.1	0.012	1	1	1	1
VEDA_02654	357	351.85	0.3417	1	9	9	24
VEDA_03000	254	61.99	0.1299	1	3	3	3
VEDA_03003	202	115.29	0.2178	1	3	3	6
VEDA_03004	506	598.66	0.3696	1	15	15	39
VEDA_03007	228	29.16	0.0746	1	1	1	1
VEDA_02657	137	253.51	0.4818	1	8	8	40
VEDA_01401	232	205.57	0.2802	1	7	7	26
VEDA_03018	770	111.42	0.0532	1	3	3	5
VEDA_03019	771	24.12	0.0259	1	1	1	1
VEDA_02713	523	118.56	0.1491	1	4	4	5
VEDA_09261	362	349.96	0.3536	1	11	11	26
VEDA_03039	755	60.07	0.0517	1	3	3	3
VEDA_07002	509	549.48	0.3202	1	14	14	31
VEDA_03041	376	115.68	0.1064	1	3	3	10
VEDA_03042	498	148.94	0.1345	1	6	6	7
VEDA_02777	314	113.9	0.1401	1	3	3	3
VEDA_03059	903	61.92	0.0321	1	2	2	2
VEDA_03067	666	39.1	0.0195	1	1	1	1
VEDA_09522	1029	16.34	0.0126	1	1	1	1
VEDA_03069	952	39.77	0.0168	1	1	1	1
VEDA_02783	235	232.08	0.3362	1	6	6	29
VEDA_04484	193	214.35	0.4041	1	5	5	8
VEDA_03075	303	185.87	0.2838	1	6	6	15
VEDA_03089	1363	18.38	0.0044	2	1	1	1
VEDA_03097	1239	27.11	0.0089	1	1	1	1
VEDA_03105	149	51.95	0.1007	1	2	2	3
VEDA_03110	290	52.93	0.0517	1	1	1	2
VEDA_02187	324	38.01	0.0586	1	1	1	2
VEDA_02801	525	176.56	0.1638	1	5	5	11
VEDA_03119	1395	27.94	0.005	1	1	1	2
VEDA_03127	355	40.58	0.0451	1	1	1	3
VEDA_03132	447	32.85	0.0291	1	1	1	2
VEDA_02811	463	193.62	0.1296	1	5	5	39
VEDA_03136	441	90.61	0.1315	1	4	4	7
VEDA_03145	577	66.5	0.0399	1	2	2	3
VEDA_03146	426	30	0.0305	1	1	1	1
VEDA_06909	324	39.35	0.0494	1	1	1	1
VEDA_08103	352	115.33	0.2301	1	6	6	7
VEDA_03172	484	55.09	0.0351	1	1	1	1
VEDA_03179	330	24.62	0.0333	1	1	1	1
VEDA_03180	272	43.05	0.0551	1	1	1	1
VEDA_03185	315	252.42	0.2698	1	6	6	11
VEDA_03201	827	22.32	0.0109	1	1	1	1
VEDA_03202	202	54.35	0.0693	1	1	1	1
VEDA_07675	601	394.84	0.2413	1	11	11	20
VEDA_03208	259	29.02	0.0695	1	1	1	1
VEDA_03213	798	85.54	0.0576	1	2	2	2
VEDA_03219	455	228.7	0.2264	1	7	7	33
VEDA_03220	509	550.64	0.2259	1	9	9	56
VEDA_03226	694	78.7	0.0331	1	2	2	5
VEDA_08401	578	19.16	0.0104	2	1	1	2
VEDA_03237	229	491.83	0.5895	1	12	12	32
VEDA_03240	222	79.56	0.1351	1	4	4	5
VEDA_03243	542	177.3	0.0775	1	4	4	7
VEDA_02839	465	372.09	0.3355	1	12	12	54
VEDA_02868	493	66.74	0.1055	1	3	3	5
VEDA_02897	1037	414.3	0.1659	1	15	15	30
VEDA_03255	74	70.76	0.3649	1	3	3	5
VEDA_03257	162	219.69	0.3519	1	7	7	12
VEDA_03270	1525	25.01	0.0105	1	1	1	1
VEDA_03529	575	32.14	0.0278	1	1	1	1
VEDA_02904	386	441.27	0.3187	1	9	9	98
VEDA_03281	409	46.21	0.044	1	1	1	2
VEDA_03293	610	24.14	0.0328	1	1	1	1
VEDA_03011	239	176.02	0.3766	1	5	5	27
VEDA_03026	496	174.32	0.2238	1	7	7	10
VEDA_03068	458	761.18	0.5546	1	18	18	98
VEDA_08360	330	21.46	0.0333	1	1	1	1
VEDA_03400	463	162.51	0.1555	1	6	6	10
VEDA_03335	617	36.18	0.034	1	1	1	1
VEDA_03344	320	21.54	0.0344	1	1	1	2
VEDA_03346	944	109.57	0.0508	1	4	5	6
VEDA_03073	450	545.23	0.4156	1	13	14	67
VEDA_03035	160	212.49	0.4	1	6	6	11
VEDA_03355	175	128.62	0.28	1	4	4	9
VEDA_03358	250	21.13	0.052	1	1	1	1
VEDA_03074	1276	272.79	0.0917	1	9	9	11
VEDA_03371	569	245.28	0.1722	1	9	9	13
VEDA_03372	188	130.09	0.266	1	4	4	6
VEDA_03379	1052	231.71	0.1017	1	9	10	11
VEDA_03111	834	1879.42	0.5731	1	32	32	675
VEDA_03398	2613	30.87	0.0046	1	1	2	2
VEDA_03118	205	49.91	0.0829	1	2	2	5
VEDA_03408	764	57.2	0.0327	1	2	2	2
VEDA_03419	527	202.02	0.1423	1	6	7	15
VEDA_03422	978	192.95	0.0828	1	6	6	6
VEDA_06060	388	411.3	0.2629	1	8	8	43
VEDA_03428	393	125.15	0.1349	2	4	4	9
VEDA_03168	403	571.72	0.4566	1	10	10	258
VEDA_03229	350	40.41	0.06	1	2	2	2
VEDA_03249	519	490.94	0.3603	1	17	17	49
VEDA_02509	337	596.63	0.4599	1	11	11	117
VEDA_03458	453	141.81	0.1545	1	6	6	7
VEDA_09382	668	1529.26	0.6467	1	31	31	481
VEDA_03423	906	67.96	0.0464	1	4	4	7
VEDA_03466	262	29.55	0.042	1	1	1	1
VEDA_03473	778	34.25	0.0193	1	1	1	1
VEDA_03481	418	63.11	0.0861	1	2	2	4
VEDA_03436	154	113.14	0.2078	1	3	3	11
VEDA_03488	157	159.82	0.2548	1	3	3	4
VEDA_03492	350	78.47	0.0914	1	2	2	5
VEDA_03502	917	423.62	0.1516	1	10	10	19
VEDA_03437	885	627.66	0.2599	1	20	20	32
VEDA_08738	166	20.29	0.0482	1	1	1	1
VEDA_03527	250	150.21	0.508	1	8	8	10
VEDA_03438	324	986.25	0.7284	1	22	22	387
VEDA_03537	154	42.41	0.0649	1	2	2	4
VEDA_03538	166	243.22	0.6024	1	6	6	42
VEDA_03539	160	217.47	0.275	1	6	6	38
VEDA_03456	186	113.97	0.1774	1	2	4	8
VEDA_03545	190	91.89	0.1053	1	3	3	7
VEDA_03463	136	319.98	0.4265	1	8	8	52
VEDA_03548	142	187.65	0.5352	1	5	5	15
VEDA_03482	251	323.05	0.5578	1	6	6	32
VEDA_03551	204	128.93	0.2059	1	4	4	14
VEDA_03503	474	872.36	0.519	1	19	19	904
VEDA_03565	102	42.61	0.1176	1	1	1	3
VEDA_03573	66	41.38	0.2727	1	1	1	3
VEDA_03577	139	29.92	0.0935	1	1	1	1
VEDA_03585	200	62.02	0.1	1	2	2	2
VEDA_03518	274	651.78	0.5803	1	17	17	131
VEDA_03599	361	507.98	0.5208	1	12	12	79
VEDA_03541	139	381.14	0.5899	1	9	9	60
VEDA_03611	127	86.79	0.1575	1	2	2	3
VEDA_03615	1050	105.17	0.0429	1	4	4	5
VEDA_03550	147	429.19	0.619	1	10	10	113
VEDA_03601	575	799.7	0.5426	1	22	23	116
VEDA_03617	191	383.7	0.5969	1	14	14	62
VEDA_03639	534	27.41	0.0206	1	1	1	2
VEDA_03643	251	129.76	0.2191	1	5	5	12
VEDA_03650	155	92.7	0.2903	1	2	2	2
VEDA_03666	388	59.98	0.0851	1	2	2	4
VEDA_03630	221	228.4	0.2851	1	4	4	37
VEDA_03685	378	356.09	0.3333	1	9	9	15
VEDA_03687	374	46.79	0.0535	1	2	2	3
VEDA_03690	499	499.89	0.3367	1	12	12	47
VEDA_03698	387	88.37	0.093	1	3	3	5
VEDA_03700	140	26.09	0.05	2	1	1	4
VEDA_03732	841	1400.78	0.4138	1	27	28	354
VEDA_03702	446	119.15	0.1031	1	4	4	5
VEDA_03710	402	80.21	0.0771	1	2	2	2
VEDA_08665	1099	22.84	0.01	1	1	1	6
VEDA_06308	741	101.86	0.0715	1	3	3	5
VEDA_03733	104	26.65	0.0865	1	1	1	1
VEDA_03736	1956	24.44	0.0077	1	2	2	2
VEDA_03745	552	487.1	0.2826	2	14	14	61
VEDA_03748	221	133.92	0.2443	1	3	3	3
VEDA_03771	666	1120.63	0.4204	1	26	27	166
VEDA_03758	205	31.1	0.0585	1	1	1	1
VEDA_01445	333	125.43	0.0631	1	3	3	4
VEDA_03763	1269	904.72	0.2805	1	30	31	54
VEDA_03764	692	58.1	0.0405	1	4	4	4
VEDA_03766	699	20.07	0.0243	1	1	1	1
VEDA_03768	255	43.5	0.1373	1	2	2	2
VEDA_04139	427	50.59	0.0468	1	2	2	2
VEDA_05729	717	327.9	0.1925	1	12	13	22
VEDA_05553	436	253.88	0.25	1	8	8	17
VEDA_03781	431	65.89	0.0696	1	3	3	3
VEDA_03777	331	181.3	0.2689	1	5	5	16
VEDA_03790	1143	305.51	0.1339	1	12	12	20
VEDA_09066	119	108.47	0.2521	1	5	5	10
VEDA_03794	1256	20.16	0.0183	1	1	1	1
VEDA_03800	560	49.33	0.0411	1	1	1	2
VEDA_04626	510	430.3	0.3118	1	12	12	40
VEDA_03803	1931	41.47	0.0104	1	1	1	1
VEDA_08071	1066	684.69	0.242	1	22	22	42
VEDA_03810	284	140.29	0.2042	1	4	4	7
VEDA_03826	410	327.18	0.2829	1	10	10	14
VEDA_02554	745	449.03	0.2054	1	12	12	25
VEDA_09167	581	288.09	0.1394	1	9	9	14
VEDA_03843	1126	584.91	0.2096	1	19	19	22
VEDA_03852	781	103.26	0.0461	1	3	3	3
VEDA_01736	297	119.09	0.1212	1	3	3	9
VEDA_00426	255	46.07	0.1098	1	3	3	4
VEDA_03872	634	29.17	0.0174	1	1	1	1
VEDA_05617	428	66.28	0.1215	1	4	4	5
VEDA_03876	307	327.81	0.4039	1	11	11	38
VEDA_03879	613	39.05	0.0098	1	1	1	8
VEDA_03881	593	92.14	0.0489	1	2	2	2
VEDA_03885	494	97.34	0.1397	1	4	4	5
VEDA_03783	1012	2157.66	0.665	1	75	76	160
VEDA_08043	246	320.61	0.4634	1	7	7	21
VEDA_03910	486	366.04	0.2284	1	8	8	16
VEDA_03925	364	203.02	0.3159	1	7	7	11
VEDA_03802	349	223.95	0.1891	1	5	5	16
VEDA_03832	561	155.79	0.1319	1	6	6	14
VEDA_03868	486	405.32	0.3436	1	10	10	18
VEDA_03875	556	1140.11	0.4568	1	21	21	647
VEDA_03956	657	34.88	0.0304	1	1	1	1
VEDA_03908	774	1399.11	0.553	1	30	30	268
VEDA_03939	859	1228.32	0.4249	1	28	29	287
VEDA_03964	1106	222.38	0.1085	1	9	9	15
VEDA_03966	233	126.89	0.2146	1	3	3	7
VEDA_03975	137	127.2	0.2409	1	3	3	17
VEDA_03976	273	69.68	0.1868	1	3	3	3
VEDA_03984	216	101.71	0.0833	1	2	2	3
VEDA_03991	421	61.42	0.0546	1	2	2	3
VEDA_04015	637	55.39	0.0235	1	1	2	29
VEDA_03951	151	126.65	0.2914	1	4	4	13
VEDA_01850	245	81.36	0.0816	1	1	1	3
VEDA_04034	416	606.68	0.3942	1	11	11	51
VEDA_05698	305	23.35	0.0623	1	1	1	1
VEDA_03958	721	1237.03	0.5007	1	27	27	123
VEDA_04049	569	63.38	0.0562	1	2	2	3
VEDA_04065	325	315.54	0.3231	1	9	9	25
VEDA_00473	494	105.33	0.0709	1	2	2	4
VEDA_04071	249	67.13	0.1285	1	3	3	5
VEDA_04072	447	535.84	0.4072	2	12	12	95
VEDA_04073	749	70.99	0.0387	1	2	2	2
VEDA_04078	451	93.3	0.051	1	2	2	2
VEDA_04087	529	45.92	0.0435	1	1	1	1
VEDA_04088	452	435.62	0.3628	1	11	11	41
VEDA_04094	324	32.39	0.0401	1	1	1	1
VEDA_04026	767	818.18	0.2881	1	20	20	78
VEDA_04098	366	300.03	0.3388	1	8	8	24
VEDA_04046	403	720.89	0.4169	1	15	16	256
VEDA_05061	519	405.92	0.21	1	11	11	34
VEDA_04109	120	33.66	0.1417	1	1	1	1
VEDA_04113	1086	20.94	0.0166	1	1	1	1
VEDA_00519	200	91.38	0.15	1	2	2	3
VEDA_04133	673	40.39	0.0223	1	1	1	1
VEDA_04135	798	173.29	0.0764	1	4	4	7
VEDA_07730	204	182.81	0.3137	1	6	6	21
VEDA_04145	297	148.8	0.2626	1	5	5	13
VEDA_04147	160	30.58	0.0938	1	1	1	2
VEDA_04149	708	217.76	0.1441	1	7	7	10
VEDA_04150	233	64.34	0.0858	1	1	1	2
VEDA_04151	395	87.34	0.0582	1	2	2	4
VEDA_04155	200	185.36	0.38	1	4	4	12
VEDA_04160	264	189.46	0.2955	1	7	7	14
VEDA_04165	322	34.27	0.0404	1	1	1	1
VEDA_01552	1861	848.77	0.1918	1	29	30	61
VEDA_04096	345	277.22	0.2551	1	6	6	15
VEDA_04169	466	197.19	0.1695	1	6	6	11
VEDA_04171	680	56.96	0.0544	1	2	2	2
VEDA_04175	542	309.89	0.1956	1	8	8	14
VEDA_04176	984	69.62	0.0234	1	2	2	2
VEDA_04182	839	78.18	0.0465	1	3	3	4
VEDA_04166	193	557.81	0.715	1	13	13	131
VEDA_04186	251	100.32	0.1235	1	2	2	8
VEDA_04205	344	446.77	0.5029	1	15	15	42
VEDA_04195	298	143.8	0.1409	1	3	3	4
VEDA_04217	747	947.44	0.3106	1	21	21	177
VEDA_04228	1097	708.1	0.2507	1	18	18	63
VEDA_04207	500	40.19	0.044	1	2	2	2
VEDA_07175	283	274.98	0.3534	2	8	8	15
VEDA_04210	377	37.96	0.1141	1	2	2	2
VEDA_04232	266	176.08	0.2105	1	4	4	12
VEDA_04298	434	258.55	0.1982	1	6	6	19
VEDA_04303	601	1035.64	0.5507	1	25	25	136
VEDA_07527	451	47.27	0.0576	1	2	2	2
VEDA_04249	343	41.83	0.0233	1	1	1	1
VEDA_04309	566	674.26	0.4117	2	21	21	64
VEDA_04263	333	70.77	0.0781	1	2	2	2
VEDA_04269	490	170.13	0.1755	1	7	7	9
VEDA_04379	539	47.35	0.0501	1	2	2	3
VEDA_04279	1028	78.17	0.0321	1	2	2	2
VEDA_04288	241	210.81	0.3776	1	5	5	13
VEDA_04409	495	151.64	0.1394	1	5	5	12
VEDA_04297	766	159.66	0.0979	1	4	5	5
VEDA_04885	621	50.55	0.0193	1	1	1	1
VEDA_04301	255	99.13	0.1176	1	2	2	2
VEDA_03351	312	81.89	0.0962	1	3	3	3
VEDA_04304	290	861.95	0.8172	1	19	19	144
VEDA_04425	243	311.14	0.3374	1	8	8	34
VEDA_04314	317	71.32	0.0789	1	3	3	6
VEDA_04315	459	330.96	0.2397	1	7	7	16
VEDA_04322	852	57.41	0.0246	1	1	2	7
VEDA_04463	397	868.18	0.6801	1	19	21	161
VEDA_04465	697	210.84	0.1908	1	8	8	21
VEDA_04340	598	44.92	0.0552	1	2	2	2
VEDA_04466	418	126.9	0.189	1	5	5	12
VEDA_04364	514	256.03	0.1654	1	8	8	16
VEDA_04479	254	151.55	0.248	1	5	5	45
VEDA_04370	604	90.62	0.0728	1	3	3	5
VEDA_04512	316	128.71	0.1266	1	2	2	9
VEDA_04387	648	346	0.2562	1	10	10	17
VEDA_04388	940	79.29	0.0319	1	2	2	3
VEDA_04517	262	501.38	0.5344	1	9	9	292
VEDA_04411	196	159.18	0.1786	1	2	2	7
VEDA_04412	496	27.1	0.0222	1	1	1	1
VEDA_04413	818	94.93	0.0489	1	3	3	3
VEDA_04417	375	61.17	0.0693	1	2	2	2
VEDA_04422	472	42.56	0.0424	1	2	2	2
VEDA_04447	700	961.63	0.4857	1	25	25	78
VEDA_04428	435	32.06	0.0253	1	1	1	2
VEDA_04429	306	23.78	0.0458	1	1	1	1
VEDA_01411	553	1042.34	0.6221	1	26	26	193
VEDA_04437	319	168.14	0.1599	1	5	5	6
VEDA_04439	98	86.37	0.2041	1	2	2	4
VEDA_04442	597	24.38	0.0268	1	1	1	1
VEDA_02067	383	309.92	0.295	1	9	9	35
VEDA_06050	626	260.65	0.1693	1	9	9	25
VEDA_04532	202	478.63	0.5594	1	13	13	141
VEDA_05009	469	119.09	0.1023	1	4	4	11
VEDA_04452	393	137.55	0.1628	1	4	4	5
VEDA_07706	253	33.77	0.0632	1	1	1	1
VEDA_07209	269	80.02	0.1301	1	2	2	2
VEDA_07987	530	45.17	0.0509	1	2	2	2
VEDA_04535	183	374.97	0.5355	1	8	10	53
VEDA_04540	229	587.41	0.8559	1	12	12	236
VEDA_04556	482	335.91	0.1535	1	7	9	41
VEDA_04478	516	80.42	0.0988	1	3	3	5
VEDA_04583	589	1636.63	0.6282	1	33	33	520
VEDA_04481	477	182.84	0.1321	1	5	5	7
VEDA_04586	474	158.1	0.1181	1	5	5	7
VEDA_04485	347	46.38	0.0403	1	1	1	1
VEDA_04487	260	126.91	0.1231	1	3	3	7
VEDA_04494	595	109.75	0.121	1	4	4	5
VEDA_04498	480	33.46	0.0271	1	1	1	1
VEDA_04602	187	234.79	0.3957	1	5	5	38
VEDA_00484	567	91.06	0.0847	1	4	4	7
VEDA_04609	218	178.56	0.1606	1	2	2	63
VEDA_04526	125	104.61	0.184	1	4	4	7
VEDA_04531	707	205.47	0.1273	1	7	7	18
VEDA_04614	341	305.51	0.2053	1	5	5	31
VEDA_04622	273	776.42	0.6337	2	15	17	144
VEDA_04539	397	91.82	0.0479	1	2	2	3
VEDA_08362	316	447.73	0.5	1	14	14	94
VEDA_04549	527	68.9	0.0512	1	2	2	2
VEDA_05479	247	104.07	0.1336	1	3	3	7
VEDA_04554	216	18.78	0.0787	1	1	1	1
VEDA_04555	105	53.7	0.2	2	2	2	2
VEDA_04711	297	601.73	0.4175	1	11	11	1609
VEDA_04561	324	54.75	0.0741	1	2	2	2
VEDA_04571	829	348.84	0.2376	1	11	11	24
VEDA_04719	838	225.64	0.1146	1	7	9	25
VEDA_04575	224	309.32	0.4777	1	7	7	21
VEDA_04578	706	61.43	0.0227	1	1	1	1
VEDA_04582	383	27.05	0.047	1	1	1	1
VEDA_08079	384	57.86	0.0521	1	2	2	3
VEDA_05338	218	129.44	0.2202	1	4	4	12
VEDA_04588	420	482.16	0.3833	1	13	13	24
VEDA_00725	205	179.73	0.2878	1	5	5	9
VEDA_04596	735	61.1	0.0626	1	3	3	3
VEDA_04764	1189	1232.05	0.3978	1	38	39	114
VEDA_04768	553	1233.85	0.5588	1	31	31	242
VEDA_04604	612	162.77	0.1029	1	5	5	7
VEDA_00901	240	400.44	0.5125	1	11	11	31
VEDA_04771	331	373.74	0.3112	1	8	8	90
VEDA_04610	594	425.93	0.3114	1	13	13	24
VEDA_04613	1478	127.35	0.0521	1	5	5	5
VEDA_04823	324	592.47	0.6605	1	15	15	86
VEDA_04616	536	308.4	0.2519	1	8	8	17
VEDA_04617	439	116.81	0.1367	1	5	5	7
VEDA_04619	318	272.46	0.2956	1	6	6	20
VEDA_04897	517	1252.56	0.6963	1	25	25	316
VEDA_04902	1047	470.91	0.2426	1	17	17	48
VEDA_04623	100	40.1	0.2	1	2	2	3
VEDA_04625	526	40.15	0.0323	1	1	1	2
VEDA_04920	136	158.22	0.4926	1	6	6	27
VEDA_04638	543	136.93	0.1971	1	7	7	8
VEDA_04640	386	177.31	0.2358	1	8	8	11
VEDA_04644	301	272.67	0.3488	1	7	7	24
VEDA_04648	446	329.18	0.2399	1	8	8	21
VEDA_09647	206	313.76	0.3447	1	6	6	35
VEDA_04654	506	376.44	0.2905	1	13	13	40
VEDA_04655	109	169.01	0.4587	1	6	6	15
VEDA_04270	492	471.87	0.3232	1	14	14	39
VEDA_04662	284	166.02	0.2148	1	4	4	9
VEDA_04663	378	39.3	0.0265	1	1	1	1
VEDA_04921	103	334	0.5825	1	7	7	46
VEDA_04670	2298	14.57	0.003	1	1	1	2
VEDA_04671	584	64.86	0.0325	1	2	2	4
VEDA_04690	332	61.26	0.0602	1	1	1	3
VEDA_04710	256	51.97	0.1016	1	2	2	2
VEDA_01585	415	394.52	0.3349	1	10	10	20
VEDA_04712	173	41.94	0.0694	1	1	1	3
VEDA_04924	341	508.1	0.478	1	10	10	134
VEDA_02147	126	129.45	0.3413	1	3	3	17
VEDA_04736	1571	351.18	0.1038	1	12	12	19
VEDA_04737	442	127.93	0.1335	1	4	4	5
VEDA_04742	1679	558.69	0.1263	1	15	15	21
VEDA_04925	839	266.06	0.1061	1	7	7	18
VEDA_04760	1029	115.45	0.0476	1	3	3	4
VEDA_04761	412	14.35	0.0413	1	1	1	1
VEDA_04763	307	127.17	0.1661	1	5	5	7
VEDA_00442	357	414.87	0.3754	1	10	10	28
VEDA_04766	210	79.35	0.2381	1	3	3	5
VEDA_04767	172	152.36	0.2791	1	5	5	24
VEDA_04928	247	417.7	0.4575	1	11	11	113
VEDA_02021	310	139.14	0.171	1	5	5	8
VEDA_04776	1106	73.38	0.0325	1	2	3	4
VEDA_06398	297	237.13	0.3064	1	6	6	21
VEDA_04950	487	125.81	0.1294	1	5	5	8
VEDA_07992	540	131.18	0.0889	1	2	2	3
VEDA_04814	510	180.49	0.1314	1	5	5	7
VEDA_00045	192	27.64	0.0313	1	1	1	9
VEDA_00075	256	266.06	0.3789	1	8	8	23
VEDA_04832	408	109.8	0.1152	1	3	3	13
VEDA_04834	426	209.62	0.1714	1	8	8	14
VEDA_04836	439	148.11	0.1116	1	4	4	5
VEDA_04852	228	48.27	0.114	1	2	2	2
VEDA_04856	189	31.93	0.0582	1	1	1	2
VEDA_04857	209	43.4	0.1196	1	2	2	3
VEDA_04861	1115	307.73	0.1193	1	11	11	18
VEDA_00191	601	45.94	0.0483	1	2	2	2
VEDA_04886	193	72.45	0.057	1	1	1	3
VEDA_04966	401	791.22	0.5287	2	16	18	375
VEDA_04898	168	167.52	0.2857	1	3	3	18
VEDA_04969	314	113.17	0.1178	1	2	2	3
VEDA_00434	307	41.06	0.0391	1	1	1	2
VEDA_00436	361	761.64	0.59	1	15	15	416
VEDA_04918	1708	86.64	0.0357	1	4	4	5
VEDA_04992	352	111.59	0.1875	1	4	4	7
VEDA_04996	448	527.48	0.3638	1	14	14	44
VEDA_04923	1574	324.13	0.0934	1	13	13	17
VEDA_05016	212	439.7	0.5047	1	10	10	41
VEDA_05017	93	160.88	0.3441	1	4	4	25
VEDA_05018	310	680.45	0.4806	1	13	13	266
VEDA_04929	1142	189.37	0.0674	1	8	9	18
VEDA_04931	207	40.07	0.1063	1	2	2	2
VEDA_04935	894	818.95	0.2919	1	25	25	83
VEDA_01287	686	281.6	0.1968	1	9	9	15
VEDA_04945	198	256.94	0.404	2	6	8	16
VEDA_05159	236	373.74	0.589	1	10	10	37
VEDA_04951	338	373.17	0.3757	1	11	11	28
VEDA_04963	346	94.97	0.0983	1	3	3	4
VEDA_01187	232	37.15	0.0431	1	1	1	3
VEDA_01230	91	173.25	0.4396	1	4	4	20
VEDA_04984	267	32.94	0.0562	1	1	1	1
VEDA_04987	559	58.46	0.0304	1	1	1	1
VEDA_04991	439	56.21	0.0911	1	2	2	2
VEDA_01278	153	56.43	0.2222	1	2	2	2
VEDA_05193	371	276.72	0.2992	1	7	7	43
VEDA_05002	207	320.57	0.372	1	7	7	45
VEDA_05004	309	22.18	0.0583	1	1	1	2
VEDA_05200	218	296.86	0.2752	1	4	4	79
VEDA_05014	578	72.76	0.0727	1	3	3	3
VEDA_05211	716	425.77	0.2318	1	9	9	69
VEDA_05245	167	245.01	0.4311	1	9	9	51
VEDA_01474	342	51.37	0.0819	1	2	2	3
VEDA_05029	999	481.78	0.2142	1	16	16	28
VEDA_05255	338	1186.88	0.8047	1	23	23	435
VEDA_05057	366	71.47	0.0765	1	2	2	3
VEDA_05058	338	29.12	0.0325	1	1	1	1
VEDA_01959	127	42.8	0.0866	1	1	1	2
VEDA_05080	1800	124.34	0.0256	1	3	3	4
VEDA_05084	801	43.84	0.025	1	2	2	2
VEDA_02038	758	97.34	0.0369	1	2	2	2
VEDA_05093	398	24.13	0.0302	1	1	1	1
VEDA_05095	535	24.12	0.0243	1	1	1	1
VEDA_05104	142	125.93	0.2183	1	2	3	8
VEDA_05108	580	45.75	0.0224	1	1	1	1
VEDA_05272	586	1269.01	0.5683	1	28	28	164
VEDA_05113	610	111.07	0.0689	1	4	4	5
VEDA_05114	697	93.32	0.0789	1	4	4	5
VEDA_05115	346	159.35	0.237	1	5	5	10
VEDA_05122	441	114.17	0.1043	1	3	3	3
VEDA_05125	941	38.25	0.0191	1	2	2	4
VEDA_05130	321	304.18	0.4081	1	8	8	19
VEDA_05325	239	539.84	0.4686	1	13	13	150
VEDA_05133	928	40.03	0.014	1	1	1	2
VEDA_05142	775	20.12	0.0129	1	1	1	1
VEDA_05147	319	21.31	0.0313	1	1	1	1
VEDA_05150	141	127.05	0.1702	1	2	2	6
VEDA_05157	463	694.15	0.689	1	22	22	50
VEDA_05158	658	341.64	0.1763	1	9	9	13
VEDA_05329	651	1466.17	0.5776	1	34	35	286
VEDA_05161	410	200.11	0.1902	1	5	5	5
VEDA_05164	245	384.19	0.3837	1	7	7	16
VEDA_05166	200	195.52	0.365	1	7	7	10
VEDA_05173	361	89.24	0.1413	1	4	4	5
VEDA_05174	889	102.49	0.0585	1	5	5	5
VEDA_05178	1110	98.07	0.0423	1	4	5	6
VEDA_02368	155	22.05	0.1871	1	1	1	1
VEDA_05351	410	98.89	0.1341	1	3	3	11
VEDA_02406	566	32.79	0.0212	1	1	1	2
VEDA_05195	292	151.49	0.2295	1	5	5	15
VEDA_05196	511	28.46	0.0313	1	1	1	2
VEDA_05197	346	64.64	0.0838	1	2	2	3
VEDA_05361	269	220.71	0.2454	1	6	6	12
VEDA_05389	655	1161.85	0.5939	1	29	30	225
VEDA_05390	500	783.09	0.488	1	20	20	117
VEDA_05409	239	408.62	0.4226	1	8	8	44
VEDA_05468	391	541.8	0.4399	1	16	16	77
VEDA_05227	225	148.76	0.1289	1	3	3	6
VEDA_05232	543	414.16	0.3481	1	14	14	26
VEDA_02998	251	135.61	0.1753	1	4	4	9
VEDA_05242	306	23.2	0.0294	1	1	1	1
VEDA_05243	708	48.56	0.0353	1	2	2	2
VEDA_03040	313	69.09	0.0639	1	1	1	2
VEDA_05247	86	58.1	0.2442	1	2	2	2
VEDA_05248	90	69.81	0.1778	1	1	1	9
VEDA_05249	153	22.06	0.085	1	1	1	1
VEDA_05250	1264	117.22	0.0491	1	5	5	6
VEDA_03045	203	32.52	0.0542	1	1	1	2
VEDA_05258	470	178.94	0.1404	1	5	5	9
VEDA_05502	288	344.17	0.434	1	9	9	68
VEDA_05505	655	962.57	0.4855	1	24	24	51
VEDA_05275	769	319.15	0.1599	1	11	11	16
VEDA_05282	742	367.52	0.1927	1	10	10	17
VEDA_05291	605	62.35	0.0579	1	2	2	2
VEDA_05307	232	176.94	0.3405	1	6	6	29
VEDA_05308	256	121.7	0.2188	1	4	4	8
VEDA_05309	355	66.49	0.0732	1	4	4	4
VEDA_05527	222	85.22	0.1306	1	3	3	3
VEDA_05326	4101	53.44	0.0046	1	1	2	3
VEDA_05328	244	33.12	0.0574	1	1	1	1
VEDA_05547	388	154.95	0.0773	1	2	2	12
VEDA_05334	160	25.83	0.0625	1	1	1	1
VEDA_05337	380	31.97	0.0368	1	1	1	3
VEDA_05560	124	116.93	0.2419	1	3	3	7
VEDA_05345	867	75.67	0.0277	1	2	2	5
VEDA_05565	254	251.33	0.4843	1	8	8	40
VEDA_04102	662	42.57	0.0196	1	1	1	2
VEDA_05377	477	172.76	0.1153	1	4	4	8
VEDA_05379	134	70.12	0.1642	1	2	2	3
VEDA_05382	579	25.67	0.0121	1	1	1	1
VEDA_05383	251	53.59	0.0637	1	2	2	3
VEDA_05387	86	43.56	0.1047	1	1	1	2
VEDA_04290	171	35.71	0.0877	1	1	1	2
VEDA_05572	409	323.38	0.3447	1	9	9	36
VEDA_05394	824	48	0.051	1	2	2	2
VEDA_05396	372	23.1	0.0269	1	1	1	2
VEDA_05398	386	371.71	0.3446	1	11	11	24
VEDA_05615	247	406.32	0.498	1	10	10	64
VEDA_05424	458	180.12	0.155	1	5	6	7
VEDA_05427	877	50.45	0.0239	1	2	2	4
VEDA_05430	367	69.81	0.0899	1	4	4	6
VEDA_05437	570	21.67	0.0263	1	1	1	1
VEDA_04450	302	39.76	0.0894	1	2	2	3
VEDA_05454	423	152.22	0.1489	1	5	5	9
VEDA_05466	521	130.57	0.0998	1	4	4	4
VEDA_05649	663	603.39	0.3107	1	18	18	42
VEDA_05659	413	632.69	0.5496	1	22	22	62
VEDA_05474	661	43.79	0.0151	1	1	1	2
VEDA_05476	251	20.75	0.0438	1	1	1	1
VEDA_04593	367	50.27	0.0409	1	1	1	2
VEDA_05480	799	311.37	0.1402	1	8	8	27
VEDA_03163	293	137.38	0.1331	1	4	4	15
VEDA_05503	319	44.98	0.0909	1	2	2	3
VEDA_05504	365	30.19	0.0466	1	1	1	1
VEDA_05702	274	461.42	0.5657	1	11	11	79
VEDA_05510	190	183.12	0.4053	1	6	6	15
VEDA_05525	1178	359.83	0.1553	1	14	14	23
VEDA_04659	139	110.65	0.1655	1	2	2	6
VEDA_04665	178	147.79	0.3708	1	3	3	3
VEDA_05710	307	700.19	0.5114	1	21	21	150
VEDA_05746	362	780.79	0.6547	1	19	19	158
VEDA_04806	372	125.45	0.0806	1	4	4	7
VEDA_05559	149	73.55	0.1946	1	2	2	3
VEDA_04827	138	35.21	0.0652	1	1	1	3
VEDA_05753	271	188.1	0.2694	1	4	4	16
VEDA_05769	307	338.42	0.342	1	7	7	37
VEDA_05570	1483	76.42	0.0216	1	2	2	3
VEDA_08583	458	431.11	0.31	1	9	10	55
VEDA_05194	313	54.91	0.0543	1	2	2	4
VEDA_05589	309	148.08	0.2395	1	6	6	11
VEDA_05612	247	138.34	0.2146	1	3	3	8
VEDA_05870	407	130.98	0.145	1	6	6	16
VEDA_05220	95	31.77	0.2947	1	1	1	4
VEDA_05621	240	42.6	0.0667	1	1	1	4
VEDA_05622	362	62.18	0.0994	1	3	3	5
VEDA_05631	888	23.84	0.0158	1	1	1	1
VEDA_05449	77	29.25	0.1948	1	1	1	1
VEDA_05467	166	85.72	0.1807	1	2	2	8
VEDA_05674	921	207.39	0.1107	1	7	7	11
VEDA_05676	313	303.21	0.377	1	7	7	14
VEDA_05692	688	63.8	0.0436	1	2	2	2
VEDA_05693	246	127.37	0.2317	1	4	4	8
VEDA_05697	247	25.31	0.0648	1	1	1	1
VEDA_05782	340	93.83	0.1235	1	2	2	2
VEDA_05881	492	1363.9	0.5711	3	23	24	1004
VEDA_05985	399	28.74	0.0276	1	1	1	1
VEDA_05704	2176	50.62	0.0087	1	2	2	2
VEDA_05708	125	158.2	0.408	1	5	5	23
VEDA_07694	687	187.79	0.1063	1	5	5	5
VEDA_05718	1956	28.53	0.0072	1	1	1	1
VEDA_05719	571	61.66	0.0368	1	2	2	2
VEDA_06104	311	383.19	0.3698	1	9	9	66
VEDA_05900	616	1305.05	0.6834	1	29	29	490
VEDA_05733	685	39.97	0.0234	1	1	1	3
VEDA_02612	243	494.27	0.642	1	10	10	276
VEDA_05748	597	47.84	0.0436	1	2	2	2
VEDA_05926	382	155.94	0.1283	1	5	5	12
VEDA_05952	345	660.13	0.658	1	18	18	141
VEDA_05777	331	38.07	0.0755	1	2	2	3
VEDA_05953	479	549.16	0.357	2	10	10	612
VEDA_05798	291	191.28	0.2474	1	5	5	18
VEDA_05801	923	24	0.0076	1	1	1	1
VEDA_05816	399	50.03	0.0677	1	2	2	2
VEDA_05820	664	48.49	0.0361	1	2	2	3
VEDA_05822	110	46.42	0.1818	1	2	2	2
VEDA_05824	1498	34.93	0.006	1	1	1	1
VEDA_06397	283	563.28	0.5866	1	12	12	61
VEDA_05841	815	24.95	0.011	1	1	1	1
VEDA_06488	482	46.35	0.0581	1	2	2	2
VEDA_06762	234	259.23	0.3547	1	6	6	14
VEDA_06772	221	188.88	0.362	1	5	5	8
VEDA_06897	88	40.19	0.1136	1	1	1	4
VEDA_05959	202	274.46	0.3564	1	9	9	55
VEDA_05918	486	24.25	0.0165	1	1	1	2
VEDA_07031	349	31.63	0.0229	1	1	1	1
VEDA_05969	541	540.93	0.2163	1	10	10	166
VEDA_05930	468	93.44	0.1346	1	3	3	5
VEDA_05978	445	94.07	0.0921	1	3	3	4
VEDA_05938	230	86.81	0.1217	1	2	2	2
VEDA_05944	203	101.88	0.2315	1	3	3	6
VEDA_05997	402	230.25	0.2836	1	11	11	18
VEDA_05998	434	270.87	0.1935	1	6	6	15
VEDA_07272	307	48.63	0.0717	1	2	2	2
VEDA_05961	121	182.24	0.3554	1	3	4	10
VEDA_06054	323	299.26	0.3065	1	5	5	30
VEDA_05977	147	51.85	0.0952	1	1	1	2
VEDA_07315	431	101.51	0.0928	1	3	3	6
VEDA_06059	468	290.33	0.1538	1	9	9	45
VEDA_05861	481	355.86	0.3389	1	12	12	30
VEDA_06126	190	342.57	0.6368	1	9	9	69
VEDA_05999	258	35.31	0.1124	1	1	1	1
VEDA_06004	370	800.62	0.5973	1	16	16	177
VEDA_06006	545	260.52	0.1908	1	9	9	28
VEDA_06008	279	89.44	0.0896	1	4	4	4
VEDA_06024	876	293.4	0.1347	1	9	9	24
VEDA_06026	162	68.88	0.2469	1	3	3	4
VEDA_06029	489	69.48	0.0941	1	3	3	4
VEDA_06030	128	142.66	0.4844	1	5	5	14
VEDA_06039	1094	289.91	0.1097	1	7	8	8
VEDA_06042	245	208.37	0.2122	1	4	4	10
VEDA_06044	352	55.89	0.0852	1	2	2	2
VEDA_06143	1527	172.82	0.0465	1	5	5	8
VEDA_07575	483	243.37	0.1967	1	6	6	10
VEDA_06058	338	26.91	0.0414	1	1	1	1
VEDA_06145	161	83.13	0.2298	1	3	3	8
VEDA_06146	179	511	0.6536	1	9	9	82
VEDA_06061	728	33.11	0.0206	1	1	1	1
VEDA_07986	138	142.79	0.3261	1	4	4	10
VEDA_06087	353	172.14	0.204	1	5	5	9
VEDA_06088	174	139.28	0.2874	1	4	4	11
VEDA_06091	1359	74.4	0.0213	1	3	3	3
VEDA_06103	359	46.87	0.0557	1	2	2	2
VEDA_08232	437	101.46	0.0641	1	2	2	2
VEDA_08371	67	34.18	0.209	1	1	1	3
VEDA_06108	1701	82.69	0.0206	1	2	2	2
VEDA_06280	572	489.19	0.3392	1	13	13	64
VEDA_02503	485	286.74	0.1402	1	5	7	31
VEDA_06133	362	53.36	0.0635	1	2	2	2
VEDA_06347	832	98.85	0.0757	1	5	5	5
VEDA_06395	598	957.62	0.5953	1	22	22	519
VEDA_08532	237	92.42	0.1224	1	2	2	3
VEDA_06447	845	1729.07	0.4485	2	27	27	827
VEDA_08563	238	79.79	0.1008	1	1	1	19
VEDA_06242	95	33.21	0.1684	1	1	1	2
VEDA_06525	958	341.84	0.1618	1	13	13	22
VEDA_06538	538	530.2	0.3587	1	14	14	29
VEDA_06299	2529	27.87	0.004	1	1	1	1
VEDA_06302	506	95.94	0.0988	1	4	4	5
VEDA_06305	472	31.95	0.0318	1	1	1	1
VEDA_06584	816	1221.82	0.4044	1	28	29	99
VEDA_06612	582	1013.19	0.4278	1	20	20	173
VEDA_06333	530	142.41	0.0868	1	3	3	14
VEDA_06335	912	33.57	0.0143	1	1	1	1
VEDA_08852	344	438.97	0.6047	1	14	14	27
VEDA_06620	570	483.34	0.2632	2	13	13	39
VEDA_06351	981	75.3	0.0336	1	3	3	5
VEDA_06353	232	51.14	0.0776	1	1	1	1
VEDA_06354	172	146.08	0.3023	1	3	3	5
VEDA_06643	151	329.51	0.6358	1	7	7	61
VEDA_06358	585	68.28	0.0256	1	1	1	2
VEDA_06361	376	46.93	0.0798	1	2	2	2
VEDA_06373	427	47.89	0.0609	1	2	2	4
VEDA_06378	414	44.21	0.0411	1	2	2	2
VEDA_06381	190	261.28	0.5632	1	6	6	11
VEDA_09098	210	106.79	0.181	1	4	4	5
VEDA_06644	262	462.9	0.5496	1	14	15	95
VEDA_06715	116	89.13	0.2845	1	4	4	28
VEDA_06407	536	21.52	0.0317	1	1	1	1
VEDA_06408	486	23.72	0.0391	1	1	1	2
VEDA_06409	123	36.46	0.1707	1	2	2	2
VEDA_06410	416	125.15	0.1442	1	4	4	7
VEDA_06731	143	218.06	0.4056	1	7	7	46
VEDA_06422	184	43.16	0.0761	1	1	1	2
VEDA_06426	401	132.9	0.1421	1	3	6	10
VEDA_06435	1131	17.28	0.0062	1	1	1	2
VEDA_06444	259	104.08	0.2587	1	4	4	5
VEDA_09545	391	112.73	0.0946	1	3	3	3
VEDA_06747	131	226.33	0.5038	1	7	7	45
VEDA_06465	90	82.62	0.2	1	2	2	3
VEDA_06466	471	61.53	0.051	1	1	1	3
VEDA_06469	561	39.92	0.0196	1	1	1	1
VEDA_04326	812	125.6	0.053	1	4	4	6
VEDA_06485	109	87.16	0.3486	1	3	3	4
VEDA_01886	612	338.42	0.2451	1	11	11	17
VEDA_06490	485	95.79	0.0639	1	3	3	5
VEDA_06491	117	76.44	0.1624	1	2	2	3
VEDA_06497	193	66.12	0.1554	1	2	2	3
VEDA_06500	547	35.12	0.0201	1	1	1	1
VEDA_06505	1050	79.88	0.0295	1	3	3	3
VEDA_06507	454	93.27	0.1256	1	5	5	8
VEDA_06510	282	100.62	0.0957	1	2	2	3
VEDA_06513	652	26.6	0.0215	1	1	1	1
VEDA_06755	317	285.47	0.1798	1	5	5	121
VEDA_06759	553	76.59	0.0669	1	2	2	3
VEDA_02886	1096	330.17	0.1359	1	11	11	16
VEDA_06542	1078	75.34	0.0297	1	3	3	3
VEDA_06543	384	344.9	0.2917	1	11	11	35
VEDA_06795	452	141.76	0.1438	1	4	4	8
VEDA_06801	156	286.62	0.4615	1	9	9	46
VEDA_06599	1790	150	0.0598	1	8	8	8
VEDA_06607	345	116.41	0.1333	1	4	4	8
VEDA_06827	217	438.14	0.5207	1	11	12	82
VEDA_06618	474	227.34	0.192	1	8	8	17
VEDA_06928	406	659.69	0.5099	1	12	12	125
VEDA_06638	2874	97.52	0.0164	2	4	4	4
VEDA_06639	872	596.97	0.2661	1	18	18	34
VEDA_06932	724	435.14	0.1906	1	10	10	32
VEDA_06961	2281	1059.24	0.1644	1	31	32	58
VEDA_06647	89	51.52	0.2697	1	2	2	3
VEDA_06650	677	32.37	0.0236	1	1	1	1
VEDA_06685	357	94.16	0.1036	2	3	3	3
VEDA_06709	128	59.5	0.0859	2	2	2	4
VEDA_06982	235	153.14	0.3191	1	3	3	20
VEDA_06719	586	107.09	0.0631	1	3	3	4
VEDA_06729	285	89.34	0.1193	1	2	2	4
VEDA_06992	432	401.1	0.2917	1	9	9	31
VEDA_06738	555	774.89	0.4054	1	17	18	55
VEDA_06739	520	77.82	0.1019	1	3	3	3
VEDA_06741	293	32.96	0.0887	1	2	2	2
VEDA_01192	418	108.92	0.1029	1	2	3	6
VEDA_06746	421	112.79	0.1093	1	5	5	6
VEDA_06995	641	324.52	0.1716	1	8	8	17
VEDA_06749	761	233.02	0.1091	1	6	6	22
VEDA_06751	1082	85.29	0.024	1	2	2	2
VEDA_06753	253	118.32	0.1107	1	2	2	3
VEDA_03909	313	71.31	0.1246	1	3	3	4
VEDA_07040	201	491.36	0.6318	1	12	12	127
VEDA_02009	605	594.19	0.3736	1	19	19	41
VEDA_06771	931	360.99	0.159	1	11	11	15
VEDA_06594	419	42.46	0.043	1	1	1	1
VEDA_06777	428	30.84	0.0327	1	1	1	2
VEDA_06779	353	39.88	0.0567	1	2	2	2
VEDA_06783	773	201.59	0.1203	1	7	7	8
VEDA_06788	444	903.53	0.6914	1	21	21	122
VEDA_07049	265	384.32	0.5057	1	12	12	77
VEDA_07050	641	923.89	0.5507	1	22	22	83
VEDA_06802	315	97.38	0.1841	1	4	4	5
VEDA_07067	189	283.27	0.4709	1	7	7	32
VEDA_06805	2715	166.81	0.035	1	8	8	10
VEDA_06806	288	28.94	0.059	1	1	1	1
VEDA_02655	99	43.16	0.2424	1	2	2	3
VEDA_07069	161	101.75	0.2112	1	3	3	15
VEDA_06830	169	114.44	0.3254	1	3	3	4
VEDA_06855	504	21.02	0.0258	1	1	1	1
VEDA_07113	499	113.94	0.1122	1	4	4	5
VEDA_06862	901	109.2	0.0388	1	2	2	3
VEDA_03943	613	371.66	0.2626	1	14	14	36
VEDA_04259	360	72.83	0.0556	1	2	2	2
VEDA_07123	355	794.08	0.5324	1	12	12	922
VEDA_06918	492	50.96	0.0752	1	2	2	2
VEDA_06925	178	48.32	0.118	1	1	1	5
VEDA_07143	893	379.07	0.2105	1	11	11	15
VEDA_07148	792	407.7	0.1755	1	9	9	20
VEDA_06933	299	41.36	0.0502	1	1	1	1
VEDA_06944	625	179.31	0.1264	1	6	6	9
VEDA_06945	445	47.69	0.0247	1	1	1	2
VEDA_06948	264	157.22	0.3485	1	4	4	20
VEDA_06951	580	24.18	0.0362	1	1	1	2
VEDA_07153	498	205.23	0.1546	1	6	6	10
VEDA_06966	299	26.42	0.0334	1	1	1	1
VEDA_06967	533	548.58	0.3171	1	11	11	21
VEDA_06974	754	193.14	0.1525	1	7	8	12
VEDA_06980	1203	43.89	0.0249	1	2	2	2
VEDA_08474	294	52.64	0.085	1	1	1	2
VEDA_06983	1252	346.39	0.1046	1	10	11	17
VEDA_04653	1144	24.23	0.0061	1	1	1	4
VEDA_01963	516	23.72	0.031	1	1	1	1
VEDA_06484	282	34.13	0.0496	1	1	1	2
VEDA_07009	95	141.59	0.3684	1	4	4	7
VEDA_00460	401	47.08	0.1047	1	2	2	3
VEDA_07011	545	155.65	0.1358	1	5	5	5
VEDA_07021	624	41.98	0.0144	1	1	1	1
VEDA_07157	460	241.95	0.1435	1	7	7	12
VEDA_07180	320	384.75	0.3	1	7	7	151
VEDA_07044	713	28.01	0.0112	1	1	1	1
VEDA_03928	213	46.76	0.0751	1	1	1	2
VEDA_07952	99	34.54	0.1313	1	1	1	1
VEDA_07053	242	161.63	0.2893	1	5	5	9
VEDA_07054	780	122.78	0.0628	1	4	4	4
VEDA_07064	695	164.43	0.1094	1	6	6	10
VEDA_05730	314	142.21	0.1561	1	5	5	13
VEDA_09709	102	81.19	0.2157	1	2	2	8
VEDA_07084	825	124.3	0.0667	1	3	3	5
VEDA_07103	761	162.13	0.0946	1	5	5	6
VEDA_00952	352	156.09	0.2415	1	5	5	5
VEDA_07111	619	294.49	0.2246	1	9	9	13
VEDA_07183	748	230.52	0.1043	1	3	3	5
VEDA_07119	1026	49.81	0.0341	1	2	2	2
VEDA_07216	478	137.08	0.2176	1	6	6	9
VEDA_08542	473	455.86	0.3087	1	12	12	40
VEDA_07127	389	295.73	0.2905	1	6	6	16
VEDA_07133	345	77.15	0.1188	1	3	3	3
VEDA_07134	1284	271.29	0.1083	1	9	9	15
VEDA_07224	476	564.2	0.4727	1	15	15	50
VEDA_07226	512	302.02	0.2852	1	7	7	62
VEDA_07152	600	322.54	0.215	1	8	9	16
VEDA_07229	320	242.14	0.25	1	6	6	32
VEDA_07242	533	315.71	0.227	1	7	7	27
VEDA_07159	605	68.34	0.0479	1	2	2	2
VEDA_07160	538	76.73	0.0818	1	3	3	3
VEDA_07166	319	99.89	0.116	1	3	3	3
VEDA_04572	261	48.08	0.1073	1	3	3	3
VEDA_06085	1286	59.02	0.0319	1	2	2	2
VEDA_08636	1020	173.47	0.0765	1	6	6	9
VEDA_07184	289	31.01	0.0311	1	1	1	1
VEDA_07186	457	387.92	0.2626	1	8	8	28
VEDA_09491	181	48.68	0.105	1	2	2	6
VEDA_07188	410	172.41	0.122	1	4	4	6
VEDA_07193	268	261.72	0.3657	1	7	7	22
VEDA_07195	550	55.76	0.0436	1	2	2	2
VEDA_07202	365	76.65	0.0493	1	1	1	2
VEDA_07253	331	911.08	0.7311	3	22	23	330
VEDA_07208	846	22.34	0.013	1	1	1	1
VEDA_07654	104	51.84	0.1154	1	1	1	2
VEDA_00341	334	349.95	0.4102	1	10	10	34
VEDA_03546	94	59.55	0.1915	1	2	2	3
VEDA_07278	716	244.79	0.1006	1	6	6	43
VEDA_07228	119	103.66	0.1681	1	1	1	2
VEDA_03334	187	24.33	0.0428	1	1	1	4
VEDA_01934	243	118.69	0.1605	1	4	4	9
VEDA_07234	455	392.48	0.244	1	9	9	16
VEDA_02190	265	57.54	0.0868	1	2	2	3
VEDA_05131	245	129.81	0.1388	1	3	3	3
VEDA_07255	496	61.73	0.0343	1	1	1	1
VEDA_02893	375	157.12	0.136	1	5	5	10
VEDA_03837	477	242.71	0.2704	1	8	9	16
VEDA_08446	392	76.14	0.0944	1	3	3	3
VEDA_07282	391	465.47	0.4527	1	12	12	27
VEDA_07292	191	74.51	0.0838	1	1	1	2
VEDA_07307	221	423.47	0.5475	1	11	11	71
VEDA_07376	295	319.78	0.2271	1	8	8	137
VEDA_07316	942	39.5	0.0244	1	2	2	3
VEDA_07334	389	26.32	0.0257	1	1	1	2
VEDA_07382	1667	1164.82	0.2927	1	34	34	110
VEDA_07378	538	10.59	0.0112	1	1	1	1
VEDA_07394	936	485.25	0.2212	1	14	14	33
VEDA_07399	353	184.92	0.2323	1	6	6	16
VEDA_07434	470	764.86	0.4447	1	20	21	156
VEDA_08637	609	53.04	0.0706	1	3	3	3
VEDA_07436	925	1514.21	0.4249	1	29	29	309
VEDA_07417	744	71.64	0.0672	1	4	4	6
VEDA_07418	279	21.07	0.0573	1	1	1	1
VEDA_07426	467	429.87	0.3383	1	11	11	37
VEDA_07428	705	41.65	0.0255	1	1	1	1
VEDA_02664	264	94.75	0.0833	1	2	2	2
VEDA_07435	317	100.01	0.142	1	3	3	7
VEDA_07489	316	64.79	0.0949	1	2	2	8
VEDA_07437	107	48.83	0.1308	1	2	2	3
VEDA_07461	804	37.72	0.0187	1	1	1	2
VEDA_07465	303	80.85	0.0561	1	1	1	4
VEDA_07467	746	56	0.0523	1	3	3	3
VEDA_07468	231	194.22	0.342	1	6	6	13
VEDA_06350	232	522.23	0.5216	1	14	14	162
VEDA_07471	524	170.56	0.1355	1	4	4	8
VEDA_07472	816	54.61	0.0135	1	1	1	4
VEDA_07476	342	30.5	0.0322	1	1	1	1
VEDA_07506	261	138.53	0.2069	1	4	4	7
VEDA_07483	266	32.2	0.0602	1	1	1	1
VEDA_07484	706	117.49	0.0737	1	3	3	3
VEDA_07512	420	230.2	0.2167	1	8	8	25
VEDA_07500	376	38.45	0.0372	1	1	1	1
VEDA_07516	222	337.67	0.5901	1	9	9	118
VEDA_07509	117	36.56	0.0855	1	1	1	6
VEDA_07510	261	184.97	0.2222	1	4	4	12
VEDA_07511	117	25.68	0.1111	1	1	1	1
VEDA_07538	564	53.29	0.016	1	2	2	19
VEDA_07554	479	935.3	0.4259	1	19	19	353
VEDA_07518	639	90.74	0.0266	1	1	1	1
VEDA_07591	535	537.04	0.3421	1	15	15	55
VEDA_07533	154	124.15	0.3052	1	3	3	19
VEDA_07534	679	23.63	0.0236	1	1	1	1
VEDA_07535	298	45.29	0.0503	1	2	2	2
VEDA_07627	165	398.41	0.5939	1	8	8	96
VEDA_07665	185	271.06	0.4378	1	7	7	78
VEDA_07567	585	18.34	0.0085	1	1	1	2
VEDA_01470	992	624.16	0.1915	1	15	15	52
VEDA_07697	701	1640.3	0.572	1	48	48	292
VEDA_07737	298	288.12	0.3389	1	8	8	13
VEDA_07593	269	29.27	0.0335	1	1	1	1
VEDA_07598	323	61.04	0.1084	1	2	2	2
VEDA_07613	83	55.09	0.2048	1	1	1	1
VEDA_07614	142	39	0.0563	1	1	1	26
VEDA_07623	584	12.35	0.0137	1	1	1	1
VEDA_07624	307	305.39	0.355	1	7	7	21
VEDA_07625	468	27.78	0.0299	1	1	1	1
VEDA_07626	772	50.2	0.0168	1	1	1	5
VEDA_07769	95	170.71	0.4737	1	5	5	50
VEDA_07630	462	23.2	0.013	1	1	1	1
VEDA_07631	651	69.01	0.0691	1	3	3	3
VEDA_07640	339	270.49	0.1947	1	5	5	18
VEDA_07652	158	173.39	0.3291	1	5	6	33
VEDA_07770	357	696.72	0.549	1	15	15	100
VEDA_07657	700	30.73	0.02	1	1	1	1
VEDA_07658	784	23.28	0.023	1	1	1	1
VEDA_08169	243	47.46	0.0453	1	1	1	2
VEDA_07777	474	65.6	0.0612	1	2	2	2
VEDA_07796	334	304.34	0.2874	1	9	9	45
VEDA_07691	295	122.19	0.1797	1	3	3	4
VEDA_07800	403	280.42	0.3251	1	11	11	24
VEDA_07806	422	800.58	0.5806	1	18	18	157
VEDA_07699	191	38.95	0.1047	1	1	1	2
VEDA_07700	586	50.22	0.0341	1	1	2	3
VEDA_07811	247	54.3	0.1012	1	2	2	23
VEDA_07707	550	28.44	0.0327	1	1	1	1
VEDA_07708	279	49.25	0.0466	1	1	1	2
VEDA_07714	942	130.66	0.0807	1	5	5	6
VEDA_07842	502	604.85	0.3367	1	15	15	74
VEDA_07914	656	714.09	0.2561	1	14	14	98
VEDA_07751	233	518.4	0.4936	1	10	10	91
VEDA_03251	420	323.38	0.2881	1	8	8	27
VEDA_07766	333	28.25	0.039	1	1	1	1
VEDA_08817	204	67.64	0.1912	1	3	3	4
VEDA_07928	225	117.26	0.12	1	2	2	6
VEDA_07931	198	159.58	0.3333	1	5	5	10
VEDA_00745	281	275.37	0.3345	1	8	9	53
VEDA_07794	452	128.45	0.1261	1	4	4	5
VEDA_01449	855	698.66	0.3088	1	19	19	53
VEDA_07956	157	197.37	0.3376	1	7	7	41
VEDA_07964	158	190.46	0.3038	1	4	4	23
VEDA_00893	180	83.09	0.1111	1	2	2	6
VEDA_08026	262	868.45	0.7672	1	18	18	161
VEDA_07812	295	116.75	0.1661	1	3	3	6
VEDA_07814	383	200.86	0.2089	1	5	6	19
VEDA_07823	92	52.99	0.0761	1	1	1	1
VEDA_07832	216	73.31	0.1343	1	2	2	2
VEDA_07838	471	429.82	0.3291	1	13	13	36
VEDA_08100	284	265.95	0.3099	1	7	7	13
VEDA_07852	424	25.91	0.0425	1	1	1	1
VEDA_08108	310	489.87	0.4581	1	17	17	51
VEDA_07874	560	75.56	0.075	1	4	4	4
VEDA_07898	418	375.31	0.3876	1	11	11	14
VEDA_07906	321	348.72	0.352	1	8	8	33
VEDA_07907	247	189.05	0.3198	1	4	4	5
VEDA_07913	1530	201.44	0.0458	2	7	7	7
VEDA_01942	517	59.04	0.0638	1	3	3	5
VEDA_08239	547	639.39	0.3419	1	15	15	35
VEDA_07929	162	292.52	0.4691	1	5	5	37
VEDA_04621	379	248.52	0.2454	1	6	7	28
VEDA_08490	470	85.59	0.1	1	3	4	9
VEDA_09184	536	508.48	0.3694	1	17	17	37
VEDA_08245	159	400.97	0.5849	1	10	10	105
VEDA_07954	798	423.24	0.1805	1	12	12	23
VEDA_07955	94	59.5	0.2766	1	2	2	5
VEDA_08246	130	233.54	0.4769	1	6	6	52
VEDA_07961	625	57.05	0.048	1	3	3	3
VEDA_08269	350	624.13	0.4571	1	14	14	76
VEDA_07965	330	1063.47	0.8242	1	20	22	219
VEDA_07968	119	30.59	0.1008	1	1	1	2
VEDA_07970	1042	48.59	0.0134	1	1	1	1
VEDA_07971	785	47.7	0.0357	1	2	2	3
VEDA_04324	276	202.93	0.3261	1	7	7	16
VEDA_08300	1246	522.54	0.1581	1	14	14	19
VEDA_07990	633	35.69	0.0253	1	1	1	1
VEDA_01011	433	390.12	0.3603	1	10	11	27
VEDA_07995	262	81.99	0.1603	1	3	3	4
VEDA_07996	1819	74.07	0.0115	1	2	2	2
VEDA_07998	4975	58.39	0.0058	1	1	2	3
VEDA_08359	183	390.57	0.5355	1	10	10	52
VEDA_08004	409	419.77	0.3252	1	11	11	44
VEDA_08366	2801	598.9	0.0728	1	19	19	64
VEDA_08011	588	331.28	0.2313	1	9	9	18
VEDA_08023	492	101.4	0.065	1	3	3	4
VEDA_08393	270	36.91	0.0889	1	2	2	2
VEDA_08029	604	127.03	0.1043	1	6	6	10
VEDA_08030	624	362.37	0.2276	1	10	10	17
VEDA_08035	600	257.51	0.1483	1	6	6	11
VEDA_08036	1547	47.29	0.0123	1	1	2	2
VEDA_08038	386	27.66	0.0233	1	1	1	1
VEDA_08409	377	313.57	0.4058	1	10	10	31
VEDA_08424	228	413.04	0.5263	1	12	12	123
VEDA_08055	349	66.42	0.0745	1	2	2	2
VEDA_08061	448	349.05	0.3281	1	10	10	18
VEDA_08068	304	201.77	0.2467	1	5	5	14
VEDA_06177	97	55.91	0.134	3	1	1	4
VEDA_08072	690	314.97	0.1797	1	10	10	26
VEDA_08074	1212	76.88	0.0248	1	3	3	4
VEDA_08440	203	263.02	0.3498	1	8	8	46
VEDA_08094	349	27	0.0258	1	1	1	2
VEDA_08099	149	21.58	0.047	1	1	1	1
VEDA_08452	377	633.98	0.5066	1	13	14	208
VEDA_03326	381	39.03	0.0446	1	1	1	1
VEDA_09168	257	31.3	0.0545	1	1	1	3
VEDA_02355	1100	510.29	0.1636	1	15	15	32
VEDA_05234	131	178.21	0.4046	1	5	5	29
VEDA_08119	320	44.79	0.0438	1	1	1	1
VEDA_08122	646	21.72	0.0139	1	1	1	4
VEDA_08133	185	48.57	0.1351	1	2	2	4
VEDA_08139	487	30.01	0.0267	1	1	1	2
VEDA_08141	376	336.61	0.258	1	7	8	22
VEDA_08160	260	421.31	0.7154	1	12	12	24
VEDA_08162	599	34.68	0.0618	1	2	2	2
VEDA_08165	360	58.3	0.075	1	2	2	2
VEDA_08166	303	120.21	0.1617	1	3	3	5
VEDA_09357	308	229.64	0.2825	1	6	6	13
VEDA_08173	219	163.8	0.1781	1	3	3	6
VEDA_08185	271	196.11	0.203	1	4	4	9
VEDA_08193	1426	43.8	0.0154	1	1	1	1
VEDA_08197	609	90.21	0.0772	1	3	3	4
VEDA_08202	610	55.5	0.0508	1	2	2	3
VEDA_08205	484	158.16	0.2004	1	5	6	8
VEDA_08207	348	57.43	0.0374	1	1	1	2
VEDA_04501	286	179.73	0.2133	1	5	5	6
VEDA_08237	347	49.05	0.1153	1	2	2	2
VEDA_04448	276	265.01	0.2717	1	7	7	12
VEDA_08240	390	32.61	0.0359	1	1	1	1
VEDA_08243	92	173.5	0.5543	1	6	6	21
VEDA_04431	271	44.83	0.0369	1	1	1	2
VEDA_08467	225	400.52	0.5378	1	11	11	53
VEDA_08249	190	24.31	0.0421	1	1	1	2
VEDA_08251	459	514.9	0.4532	1	13	13	41
VEDA_08263	230	57.27	0.1478	1	3	3	5
VEDA_09247	191	82.02	0.1571	1	3	3	7
VEDA_08285	197	25.54	0.066	1	1	1	1
VEDA_08286	239	33.55	0.0711	1	1	1	1
VEDA_08289	612	55.08	0.0425	1	2	2	2
VEDA_08290	176	43.04	0.125	1	2	2	3
VEDA_08487	666	209.03	0.1186	1	5	5	14
VEDA_08319	414	68.73	0.1063	1	4	4	4
VEDA_08322	310	44.99	0.0323	1	1	1	1
VEDA_08326	470	93.34	0.0787	1	4	4	7
VEDA_08331	1396	536.88	0.1447	1	18	18	37
VEDA_08332	1433	71.88	0.0161	1	2	2	2
VEDA_08333	858	56.95	0.0175	1	1	1	1
VEDA_08356	649	196.84	0.1479	1	7	7	13
VEDA_08522	552	1002.96	0.4601	1	24	24	237
VEDA_06107	476	138.89	0.1176	1	5	5	14
VEDA_08557	336	363.3	0.2113	1	8	8	109
VEDA_08365	536	121.82	0.084	1	3	4	16
VEDA_08569	462	394.63	0.2684	1	8	8	23
VEDA_08370	348	53.18	0.069	1	1	1	1
VEDA_08571	608	192.68	0.1168	1	7	7	12
VEDA_08374	451	24.81	0.0244	1	1	1	1
VEDA_08380	662	42.53	0.0302	1	1	1	1
VEDA_08385	780	26.4	0.0128	1	1	1	1
VEDA_08389	604	270.59	0.1871	1	7	8	13
VEDA_02470	423	86.98	0.0804	1	3	3	5
VEDA_08397	548	324.2	0.2007	1	8	8	11
VEDA_05576	523	363.8	0.3098	1	12	12	32
VEDA_08408	418	67.82	0.0694	1	2	2	3
VEDA_08592	336	228.63	0.3125	1	6	6	9
VEDA_01699	2230	929.7	0.183	1	31	32	60
VEDA_08417	1153	151.64	0.0694	1	8	8	12
VEDA_08630	277	661.6	0.5704	1	13	13	132
VEDA_08631	337	94.99	0.095	1	3	3	5
VEDA_08443	620	163.32	0.121	1	6	6	8
VEDA_03328	378	363.66	0.3519	1	9	9	47
VEDA_08449	239	61.37	0.1841	1	3	3	4
VEDA_08633	334	245.43	0.2275	1	6	6	14
VEDA_08456	2118	1084.21	0.2318	1	36	36	59
VEDA_08460	191	30.02	0.1518	1	1	1	1
VEDA_08466	1019	103.81	0.0334	1	3	3	3
VEDA_09806	404	240.37	0.1807	1	6	6	23
VEDA_08652	378	488.36	0.3651	1	13	13	89
VEDA_08478	319	150.04	0.1818	1	4	4	9
VEDA_08481	1207	39.36	0.0141	1	1	2	2
VEDA_08721	181	102.16	0.1602	1	2	2	6
VEDA_08489	121	139.21	0.4876	1	4	4	13
VEDA_07108	303	97.33	0.1056	1	5	5	7
VEDA_08497	390	73.32	0.0974	1	3	3	14
VEDA_08510	191	67.58	0.1571	1	3	3	5
VEDA_08520	93	56.18	0.1935	1	2	2	4
VEDA_08739	365	270.02	0.2575	2	5	5	71
VEDA_08741	671	461.79	0.3905	1	12	12	29
VEDA_08533	612	31.71	0.0294	1	1	1	2
VEDA_08541	881	324	0.1827	1	10	11	15
VEDA_08790	630	308.81	0.2159	1	12	12	16
VEDA_08806	87	188.09	0.5747	1	5	5	32
VEDA_08547	249	167.18	0.1847	1	4	4	8
VEDA_08548	710	193.22	0.1099	1	5	6	10
VEDA_08549	499	49.48	0.0641	1	2	2	2
VEDA_01515	326	24.01	0.0368	1	1	1	1
VEDA_02360	500	56.32	0.044	1	1	1	2
VEDA_08560	406	79.89	0.0493	1	2	2	4
VEDA_08813	395	381.69	0.2456	1	6	6	118
VEDA_04362	402	96.41	0.1095	1	2	2	2
VEDA_08570	189	68.89	0.1587	1	1	1	2
VEDA_07666	325	435.42	0.4031	1	11	11	26
VEDA_08818	232	397.91	0.4526	2	9	9	51
VEDA_08821	182	439.52	0.5165	1	7	9	236
VEDA_08600	555	319.95	0.2234	1	9	9	16
VEDA_08602	539	129.73	0.1206	1	5	5	5
VEDA_08617	131	77.97	0.0992	1	2	2	16
VEDA_08624	547	59.95	0.0622	1	2	2	2
VEDA_08829	509	63.23	0.0629	1	2	2	3
VEDA_09111	395	578.38	0.5544	1	13	14	93
VEDA_00185	369	333.89	0.4417	1	12	12	19
VEDA_08634	408	36.89	0.0343	1	1	1	1
VEDA_08836	534	399.54	0.294	1	12	12	51
VEDA_02526	369	157.69	0.1355	1	3	3	12
VEDA_02328	610	23.65	0.0262	1	1	1	1
VEDA_03806	658	264.12	0.2097	1	9	9	13
VEDA_08861	925	173.73	0.0692	1	5	5	5
VEDA_08865	635	708.01	0.3465	1	13	13	153
VEDA_08678	671	76.61	0.0551	1	3	3	4
VEDA_08684	127	46.06	0.1181	1	1	1	2
VEDA_08687	468	306.98	0.2521	1	4	8	15
VEDA_08558	587	196.09	0.1874	2	8	8	11
VEDA_08867	842	1231.74	0.4656	1	26	26	376
VEDA_08730	255	193.77	0.1725	1	4	4	10
VEDA_03755	413	34.61	0.0218	1	1	1	2
VEDA_02742	510	601.02	0.3275	1	13	13	50
VEDA_08886	284	268.01	0.3028	1	6	6	38
VEDA_08742	1184	37.4	0.0118	1	1	1	2
VEDA_08748	613	76.2	0.0555	1	4	4	5
VEDA_08752	353	109.6	0.1133	1	3	3	3
VEDA_08758	383	31.64	0.0287	1	1	1	1
VEDA_08777	292	357.39	0.363	1	8	8	63
VEDA_08784	531	120.91	0.081	1	4	4	7
VEDA_08786	265	26.05	0.034	1	1	1	1
VEDA_08787	489	154.75	0.1247	1	6	6	7
VEDA_08104	665	43.36	0.0406	1	2	2	2
VEDA_08799	177	29.34	0.0734	1	1	1	1
VEDA_08801	1332	49.23	0.006	1	1	1	8
VEDA_08802	573	467.08	0.356	1	15	15	39
VEDA_00003	1072	568.44	0.2565	1	18	19	27
VEDA_08911	542	203.77	0.1089	1	5	5	19
VEDA_08815	323	249.55	0.1827	1	5	5	72
VEDA_02026	292	308.88	0.3527	1	9	9	59
VEDA_08919	284	136.81	0.1197	1	3	3	7
VEDA_08934	394	748.42	0.5838	1	20	20	50
VEDA_08822	523	105.98	0.0535	1	3	3	6
VEDA_09003	426	1034.73	0.5892	1	17	17	763
VEDA_08834	570	65.11	0.0263	1	1	1	1
VEDA_03327	381	252.54	0.1785	2	7	7	14
VEDA_09015	342	308.38	0.3567	1	6	6	114
VEDA_08843	532	118.23	0.109	1	5	5	13
VEDA_06889	1247	95.05	0.02	1	2	2	2
VEDA_08850	953	180.12	0.0724	1	5	5	8
VEDA_09016	448	432.24	0.4063	1	12	12	43
VEDA_08854	281	23.03	0.0996	1	1	1	1
VEDA_04607	274	87.59	0.1168	1	3	3	8
VEDA_08864	221	68.69	0.2398	1	3	3	3
VEDA_09100	110	410.94	0.8455	1	9	9	89
VEDA_09144	453	129.53	0.117	1	4	4	10
VEDA_09152	94	104.42	0.4255	1	3	3	18
VEDA_08887	332	62	0.0753	1	2	2	2
VEDA_08900	477	618.07	0.4591	1	15	15	47
VEDA_09170	289	109.04	0.1661	1	4	4	9
VEDA_08909	256	217.51	0.4531	1	7	7	12
VEDA_09701	1528	375.3	0.1021	1	13	13	17
VEDA_08916	499	56.69	0.0641	1	2	2	2
VEDA_09206	461	645.35	0.3926	1	17	18	76
VEDA_08932	162	27.05	0.1111	1	1	1	2
VEDA_09232	125	272.06	0.576	1	6	6	57
VEDA_08937	542	106.68	0.0886	1	4	4	4
VEDA_08946	243	120.77	0.214	1	4	4	8
VEDA_05933	205	287.68	0.4195	1	7	7	39
VEDA_06743	241	37.5	0.0705	1	1	1	2
VEDA_01398	567	577.97	0.4021	1	18	18	37
VEDA_09026	904	133.97	0.0575	1	4	4	6
VEDA_09038	622	122.6	0.0659	1	3	3	4
VEDA_09043	230	25.27	0.0304	1	1	1	1
VEDA_09053	425	26.59	0.0188	1	1	1	1
VEDA_09056	102	247.03	0.4902	1	6	6	26
VEDA_09058	553	523.36	0.3508	1	17	17	48
VEDA_09062	383	41.93	0.0313	1	1	1	2
VEDA_02555	530	551.63	0.3057	1	12	13	41
VEDA_09069	153	223.18	0.634	1	6	6	57
VEDA_09071	269	44.27	0.0483	1	2	2	4
VEDA_09077	420	195.95	0.1595	1	5	5	14
VEDA_09079	317	66.36	0.0915	1	3	3	4
VEDA_03769	551	422.78	0.2704	1	15	15	20
VEDA_09085	616	234.01	0.1656	1	8	8	11
VEDA_09093	328	199.57	0.2195	1	6	6	15
VEDA_09096	281	71.35	0.0747	1	2	2	3
VEDA_07481	637	550.74	0.3014	1	14	14	36
VEDA_09249	106	153.63	0.2453	2	4	4	20
VEDA_09105	223	56.24	0.139	1	2	2	3
VEDA_09107	342	101.7	0.1345	1	5	5	8
VEDA_09252	282	885.77	0.6773	1	16	18	150
VEDA_09115	1816	124.98	0.0314	1	4	5	16
VEDA_09116	252	131.1	0.2262	1	4	4	7
VEDA_09130	175	223.13	0.3314	1	5	5	37
VEDA_09133	299	47.41	0.0368	1	1	1	2
VEDA_09140	537	21.08	0.0168	1	1	1	1
VEDA_07470	544	504.55	0.3787	1	16	16	46
VEDA_09294	341	386.51	0.3988	2	11	11	69
VEDA_06416	235	106.03	0.217	1	4	4	6
VEDA_09305	770	1690.44	0.5429	1	35	36	455
VEDA_09314	151	370.63	0.5298	1	9	9	69
VEDA_09173	353	149.1	0.17	1	4	4	6
VEDA_09178	166	48.2	0.247	1	2	2	2
VEDA_09328	505	1540.82	0.7406	1	36	36	381
VEDA_09194	523	24.81	0.0134	1	1	1	1
VEDA_09199	363	36.38	0.0165	1	1	1	1
VEDA_09336	682	89.68	0.0411	1	3	3	7
VEDA_09218	514	107.12	0.0486	1	3	3	8
VEDA_03015	557	439.86	0.2316	1	10	10	22
VEDA_09233	49	79.32	0.2041	1	1	1	4
VEDA_09345	438	1577.56	0.8288	2	29	30	886
VEDA_09244	109	121.04	0.5229	1	4	4	19
VEDA_09246	996	520.5	0.1978	1	12	12	22
VEDA_07275	344	261.75	0.3401	1	7	7	23
VEDA_08908	357	212.53	0.2745	1	7	7	13
VEDA_09346	874	923.04	0.3673	1	24	24	50
VEDA_09255	584	33.01	0.0291	1	1	1	2
VEDA_04191	796	185.69	0.0653	1	4	4	9
VEDA_09270	437	37.82	0.0366	1	1	1	1
VEDA_09271	420	99.29	0.0762	1	4	4	6
VEDA_09286	473	46.08	0.0465	1	2	2	2
VEDA_09349	531	469.63	0.3352	1	13	14	49
VEDA_01950	459	32.59	0.0305	1	1	1	1
VEDA_09313	564	52.21	0.0496	1	3	3	3
VEDA_04183	607	170.6	0.1499	1	7	7	13
VEDA_09318	313	28.16	0.0607	1	1	1	1
VEDA_09327	115	35.37	0.2	1	1	1	1
VEDA_09353	443	373.19	0.2506	1	8	8	66
VEDA_07203	170	420.65	0.5118	1	12	12	99
VEDA_09338	183	73.1	0.1257	1	2	2	2
VEDA_09342	121	45.51	0.2893	1	2	2	6
VEDA_02487	219	45.26	0.1005	1	1	1	2
VEDA_09365	218	363.65	0.4312	1	9	9	76
VEDA_04103	288	78.55	0.1007	1	3	3	6
VEDA_09376	412	791.95	0.5024	1	19	19	145
VEDA_09356	120	26.81	0.1	1	1	1	1
VEDA_04038	801	52.38	0.025	1	2	2	2
VEDA_09082	454	242.15	0.2203	1	6	7	19
VEDA_09378	148	278.16	0.5541	1	7	7	83
VEDA_09368	804	135.9	0.0448	1	3	4	5
VEDA_09370	931	46.31	0.0172	1	1	1	1
VEDA_01646	252	186.23	0.2222	1	3	3	5
VEDA_09373	988	148.14	0.0638	1	4	4	4
VEDA_05925	377	636.18	0.443	1	14	14	168
VEDA_07870	535	801.15	0.3888	1	12	12	922
VEDA_09379	476	85.65	0.0924	1	3	3	8
VEDA_09427	413	99.66	0.092	1	3	3	9
VEDA_09383	1042	28.45	0.0288	1	1	1	1
VEDA_09384	1510	11.24	0.004	1	1	1	1
VEDA_09393	152	66.78	0.1974	1	2	2	4
VEDA_09404	693	62.16	0.0476	1	3	3	4
VEDA_09406	219	116.85	0.1781	1	3	3	12
VEDA_09408	931	267.23	0.1117	1	8	8	14
VEDA_09411	294	56.75	0.0918	1	2	2	2
VEDA_07404	543	272.13	0.1897	1	7	7	18
VEDA_07590	638	216.05	0.1442	1	8	8	10
VEDA_09431	419	43.52	0.0215	1	1	1	1
VEDA_09435	283	42.76	0.0813	1	2	2	2
VEDA_09436	367	159.32	0.1989	1	5	5	7
VEDA_09441	1232	62.37	0.0446	1	3	3	3
VEDA_09452	247	42.57	0.1296	1	2	2	2
VEDA_08544	519	450.84	0.3064	1	14	14	24
VEDA_09468	176	27.01	0.0682	1	1	1	1
VEDA_03207	98	30.68	0.0714	1	1	1	10
VEDA_04239	366	199.46	0.2104	1	7	7	20
VEDA_09527	458	70.66	0.0699	1	2	2	5
VEDA_09534	324	30.68	0.0278	1	1	1	1
VEDA_09538	516	79.59	0.0484	1	3	3	7
VEDA_06132	569	136.36	0.1037	1	5	5	9
VEDA_01918	161	28.51	0.1118	1	1	1	2
VEDA_09547	457	52.86	0.0219	1	1	1	1
VEDA_04168	479	100.99	0.0981	1	4	4	6
VEDA_09568	816	59.98	0.0319	1	2	2	2
VEDA_03597	339	26.83	0.0413	1	1	1	2
VEDA_09574	634	110.56	0.0946	1	4	4	7
VEDA_02743	407	23.77	0.0467	1	1	1	1
VEDA_09579	1030	120.97	0.0631	1	4	4	4
VEDA_09580	1474	84.71	0.0421	1	3	3	3
VEDA_09595	285	259.97	0.2842	1	5	5	11
VEDA_09544	458	503.84	0.3712	1	13	13	44
VEDA_05829	276	520.19	0.5362	1	13	13	47
VEDA_09620	194	107.98	0.1443	1	3	3	9
VEDA_02267	347	126.82	0.1729	1	6	6	10
VEDA_09648	535	53.19	0.0505	1	2	2	4
VEDA_09652	496	217.33	0.1169	1	5	5	8
VEDA_09655	281	246.92	0.452	1	8	8	26
VEDA_09661	778	41.59	0.0231	1	2	2	2
VEDA_09665	467	181.94	0.2291	1	6	6	8
VEDA_09667	502	56.67	0.0697	1	3	3	3
VEDA_09671	380	28.4	0.0158	1	1	1	1
VEDA_09687	184	60.97	0.1196	1	2	2	2
VEDA_09566	620	413.27	0.2371	1	10	10	30
VEDA_09577	1052	1662.72	0.5418	1	42	42	272
VEDA_09703	176	74.75	0.1307	2	1	2	4
VEDA_09708	199	28.39	0.0503	1	1	1	1
VEDA_09605	886	1689.94	0.5598	1	39	39	564
VEDA_09610	370	117.36	0.1378	1	4	4	10
VEDA_09729	1316	248.35	0.098	1	9	10	10
VEDA_09695	448	467.8	0.3795	1	12	12	43
VEDA_09719	548	435.78	0.2299	1	12	12	36
VEDA_09735	439	442.37	0.3121	1	11	11	35
VEDA_09738	193	74.7	0.0984	1	1	1	3
VEDA_09739	332	95.2	0.1325	1	4	4	4
VEDA_09741	275	59.49	0.0691	1	1	1	1
VEDA_09730	335	974	0.5791	1	16	17	180
VEDA_09734	746	510.09	0.2118	1	11	11	27
VEDA_09753	401	317.01	0.2095	1	6	6	38
VEDA_09778	130	200.77	0.5077	2	5	5	10
VEDA_09744	345	607.65	0.4986	1	12	12	102
VEDA_09811	127	217.92	0.4488	1	4	4	29
VEDA_09812	584	153.2	0.0993	1	5	5	7
