# Supplementary material for: Characterization of the Verticillium dahliae Exoproteome Involves in Pathogenicity from Cotton-Containing Medium
Source: Front Microbiol. 2016 Oct 28;7:1709. doi: 10.3389/fmicb.2016.01709 (PMC5083787; doi:10.3389/fmicb.2016.01709)
Supplement: Supplementary file 5 [file Data_Sheet_5.XLSX]

## Sheet: Sheet1
Table S5 Functional annotation of the significantly regulation proteins by the iTRAQ quantification
Gene-ID	Protein Length	Secretome	Fold-change	P-value	nr annotation	GO_Accession	KO_ID	BR_family/PATH_way	IPR_define	PHI_ID/Gene_name/EMBL_accession/Species:NCBI_taxID/PHI_define	Small cysteine-rich proteins	No. Cysteine residues	LysM	NLP
VEDA_00080	118		0.65±0.06	2.02e-11	thioredoxin	GO:0006662//GO:0009055//GO:0015035//GO:0045454	K03671	[BR:ko03110]	IPR005746; Thioredoxin//IPR012336; Thioredoxin-like fold//IPR013766; Thioredoxin domain	NA		1
VEDA_00136	667	SEC	9.90±0.87	0	endoglucanase B	GO:0003824//GO:0004553//GO:0005576//GO:0005975//GO:0030248//GO:0043169	K01179	[PATH:ko00500]	IPR000254; Cellulose-binding domain, fungal//IPR001547; Glycoside hydrolase, family 5//IPR005102; Carbohydrate binding X2 domain//IPR013781; Glycoside hydrolase, subgroup, catalytic domain//IPR013783; Immunoglobulin-like fold//IPR014756; Immunoglobulin E-set//IPR016282; Glycoside hydrolase, family 5, endoglucanase B//IPR017853; Glycoside hydrolase, superfamily	PHI:569//XYL3//AAC06239//Fusarium oxysporum:NCBI_taxID=TX:5507//Unaffected pathogenicity		8
VEDA_00176	611	SEC	7.08±0.51	9.33e-60	L-amino acid oxidase	GO:0016491//GO:0055114	NA	NA	IPR002937; Amine oxidase	NA		3
VEDA_00233	106		0.50±0.07	6.21e-14	cytochrome c	GO:0005506//GO:0009055//GO:0020037	K08738	[PATH:ko04210][PATH:ko04115][PATH:ko05200][PATH:ko05210][PATH:ko05222][PATH:ko05010][PATH:ko05012][PATH:ko05014][PATH:ko05016][PATH:ko05416][PATH:ko05152][PATH:ko05164][PATH:ko05145]	IPR002327; Cytochrome c, class IA/ IB//IPR003088; Cytochrome c, class I//IPR009056; Cytochrome c domain	NA		2
VEDA_00251	348		0.46±0.16	8.52e-09	hypothetical protein	GO:0005515	K01427	[PATH:ko00230][PATH:ko00330]	IPR009071; High mobility group, superfamily	NA		0
VEDA_00253	236	SEC	5.16±0.50	4.24e-30	glycosyl hydrolase family 45	GO:0005975//GO:0008810	NA	NA	IPR000334; Glycoside hydrolase, family 45//IPR009009; Barwin-related endoglucanase//IPR014733; Barwin-like endoglucanase	NA		14	Y
VEDA_00296	623		3.39±0.75	1.15e-13	fumarate reductase	GO:0000104//GO:0009055//GO:0016491//GO:0020037//GO:0055114	K01593	[PATH:ko00340][PATH:ko00350][PATH:ko00360][PATH:ko00380][PATH:ko00901][PATH:ko00950][PATH:ko00965]	IPR001199; Cytochrome b5//IPR003953; Fumarate reductase/succinate dehydrogenase flavoprotein, N-terminal//IPR010960; Flavocytochrome c	NA		4
VEDA_00310	462	SEC	2.09±0.16	6.82e-15	TOS1 protein	NA	NA	NA	IPR018805; Protein of unknown function DUF2401, secretory//IPR018807; Domain of unknown function DUF2403, glycine-rich	NA		10
VEDA_00430	340	SEC	8.77±1.05	3.81e-20	hypothetical protein	GO:0003824//GO:0005506//GO:0006725//GO:0008199//GO:0016702//GO:0055114	K03381	[PATH:ko00362][PATH:ko00364][PATH:ko00361][PATH:ko00623]	IPR000627; Intradiol ring-cleavage dioxygenase, C-terminal//IPR015889; Intradiol ring-cleavage dioxygenase, core	NA		3
VEDA_00517	1684	SEC	3.82±0.14	3.69e-38	hypothetical protein	NA	K01238	NA	IPR002889; Carbohydrate-binding WSC//IPR013994; Carbohydrate-binding WSC, subgroup	NA		40
VEDA_00540	883	SEC	2.04±0.24	1.93e-14	hypothetical protein	GO:0004553//GO:0005975	K01188	[PATH:ko00500][PATH:ko00460][PATH:ko00940]	IPR001764; Glycoside hydrolase, family 3, N-terminal//IPR002772; Glycoside hydrolase family 3 C-terminal domain//IPR017853; Glycoside hydrolase, superfamily//IPR019800; Glycoside hydrolase, family 3, active site	PHI:748//um00446//Not available//Ustilago maydis:NCBI_taxID=TX:5270//Unaffected pathogenicity		7
VEDA_00570	100	SEC	2.14±0.20	2.43e-40	hypothetical protein	GO:0004252//GO:0042802//GO:0043086	NA	NA	IPR009020; Proteinase inhibitor, propeptide//IPR010259; Proteinase inhibitor I9	NA		0
VEDA_00597	219	SEC	17.39±1.16	5.96e-37	endoglucanase II	NA	K01238	NA	IPR005103; Glycoside hydrolase, family 61	NA		3
VEDA_00715	1042	SEC	1.80±0.08	1.48e-26	hypothetical protein	GO:0004601//GO:0006979//GO:0020037//GO:0055114	K00434	[PATH:ko00053][PATH:ko00480]	IPR002016; Haem peroxidase, plant/fungal/bacterial//IPR002889; Carbohydrate-binding WSC//IPR010255; Haem peroxidase//IPR013994; Carbohydrate-binding WSC, subgroup	NA		42
VEDA_00841	376		4.55±0.44	9.95e-27	formate dehydrogenase	GO:0000166//GO:0008152//GO:0016616//GO:0048037//GO:0051287//GO:0055114	K00122	[PATH:ko00630][PATH:ko00680]	IPR006139; D-isomer specific 2-hydroxyacid dehydrogenase, catalytic domain//IPR006140; D-isomer specific 2-hydroxyacid dehydrogenase, NAD-binding//IPR016040; NAD(P)-binding domain	NA		4
VEDA_00895	325		2.88±0.30	4.5e-12	dihydrodipicolinate synthase	GO:0003824//GO:0008152//GO:0016829	K01726	[PATH:ko00650][PATH:ko00903][PATH:ko00362][PATH:ko00363][PATH:ko00626]	IPR002220; Dihydrodipicolinate synthetase-like//IPR013785; Aldolase-type TIM barrel	NA		4
VEDA_01030	210		0.55±0.03	8.81e-06	ERP3 protein	GO:0006810//GO:0016021	K11838	[BR:ko01002][BR:ko04121]	IPR009038; GOLD	NA		5
VEDA_01055	452		0.61±0.06	3.15e-40	NADP-specific glutamate dehydrogenase	GO:0000166//GO:0006520//GO:0016491//GO:0016639//GO:0055114	K00262	[PATH:ko00910][PATH:ko00250][PATH:ko00330]	IPR006095; Glutamate/phenylalanine/leucine/valine dehydrogenase//IPR006096; Glutamate/phenylalanine/leucine/valine dehydrogenase, C-terminal//IPR006097; Glutamate/phenylalanine/leucine/valine dehydrogenase, dimerisation domain//IPR014362; Glutamate dehydrogenase//IPR016040; NAD(P)-binding domain	NA		5
VEDA_01068	551		0.51±0.13	3.89e-08	importin subunit alpha-1a	GO:0005488//GO:0005515//GO:0005634//GO:0005737//GO:0006606//GO:0008565	K15043	[PATH:ko05164]	IPR000225; Armadillo//IPR002652; Importin-alpha, importin-beta-binding domain//IPR011989; Armadillo-like helical//IPR016024; Armadillo-type fold//IPR024931; Importin subunit alpha	NA		13
VEDA_01080	166		1.84±0.07	3.82e-06	cyanate hydratase	GO:0003677//GO:0008824//GO:0009439	K01725	[PATH:ko00910]	IPR003712; Cyanate lyase, C-terminal//IPR008076; Cyanate hydratase//IPR010982; Lambda repressor-like, DNA-binding	NA		0
VEDA_01106	298		0.60±0.05	3e-16	oxidoreductase	GO:0000166//GO:0008152//GO:0016491	K00540	NA	IPR002198; Short-chain dehydrogenase/reductase SDR//IPR002347; Glucose/ribitol dehydrogenase//IPR016040; NAD(P)-binding domain//IPR020904; Short-chain dehydrogenase/reductase, conserved site	NA		1
VEDA_01162	427	SEC	9.60±0.80	8.28e-53	endoglucanase EG-1	GO:0004553//GO:0005975	K01179	[PATH:ko00500]	IPR001722; Glycoside hydrolase, family 7//IPR008985; Concanavalin A-like lectin/glucanase	PHI:566//cel2//AAK19621//Cochliobolus carbonum:NCBI_taxID=TX:5017//Unaffected pathogenicity		19
VEDA_01184	113		2.81±0.16	1.3e-78	hypothetical protein	NA	NA	NA	IPR009799; EthD domain//IPR011008; Dimeric alpha-beta barrel	NA		0
VEDA_01275	699		1.70±0.10	1.61e-34	thimet oligopeptidase	GO:0004222//GO:0006508	K13726	[BR:ko01002]	IPR001567; Peptidase M3A/M3B//IPR024077; Neurolysin/Thimet oligopeptidase, domain 2//IPR024079; Metallopeptidase, catalytic domain//IPR024080; Neurolysin/Thimet oligopeptidase, N-terminal	NA		5
VEDA_01287	686	SEC	7.65±0.52	1.68e-25	alpha-L-rhamnosidase	GO:0003824	K12828	[PATH:ko03040][BR:ko03041]	IPR008902; Bacterial alpha-L-rhamnosidase//IPR008928; Six-hairpin glycosidase-like	NA		4
VEDA_01289	271	SEC	3.36±0.39	1.68e-25	hypothetical protein	NA	NA	NA	NA	NA	Y	18
VEDA_01314	1069		3.36±0.46	1.68e-14	mixed-linked glucanase	GO:0004553//GO:0005975	K01238	NA	IPR000757; Glycoside hydrolase, family 16//IPR008985; Concanavalin A-like lectin/glucanase//IPR013320; Concanavalin A-like lectin/glucanase, subgroup	NA		18
VEDA_01366	751	SEC	2.29±0.07	5.09e-187	hypothetical protein	NA	NA	NA	NA	NA		9
VEDA_01382	377	SEC	6.04±0.48	2.39e-32	acetylxylan esterase	GO:0004553//GO:0005576//GO:0005975//GO:0030248	K01567	NA	IPR000254; Cellulose-binding domain, fungal//IPR010126; Esterase, PHB depolymerase	PHI:569//XYL3//AAC06239//Fusarium oxysporum:NCBI_taxID=TX:5507//Unaffected pathogenicity		10
VEDA_01389	465	SEC	4.73±0.42	4.61e-47	hypothetical protein	GO:0004553//GO:0005576//GO:0005975//GO:0030248	K01238	NA	IPR000254; Cellulose-binding domain, fungal	PHI:569//XYL3//AAC06239//Fusarium oxysporum:NCBI_taxID=TX:5507//Unaffected pathogenicity		10
VEDA_01395	422	SEC	7.37±0.07	4.63e-25	zinc carboxypeptidase A 1	GO:0004181//GO:0006508//GO:0008270	K01290	[BR:ko01002]	IPR000834; Peptidase M14, carboxypeptidase A//IPR009020; Proteinase inhibitor, propeptide	NA		5
VEDA_01417	464	SEC	9.63±0.77	8.48e-34	polygalacturonase	GO:0004650//GO:0005975	K01213	[PATH:ko00040][PATH:ko00500]	IPR000743; Glycoside hydrolase, family 28//IPR011050; Pectin lyase fold/virulence factor//IPR012334; Pectin lyase fold	PHI:115//PGX1//AAC26146//Cochliobolus carbonum:NCBI_taxID=TX:5017//Unaffected pathogenicity		11
VEDA_01436	533	SEC	12.50±1.93	0	exoglucanase	GO:0004553//GO:0005576//GO:0005975//GO:0030248	K01238	NA	IPR000254; Cellulose-binding domain, fungal//IPR001722; Glycoside hydrolase, family 7//IPR008985; Concanavalin A-like lectin/glucanase	PHI:566//cel2//AAK19621//Cochliobolus carbonum:NCBI_taxID=TX:5017//Unaffected pathogenicity		22
VEDA_01449	855	SEC	5.17±0.55	4.92e-75	pectate lyase	NA	K01728	[PATH:ko00040]	IPR011050; Pectin lyase fold/virulence factor//IPR012334; Pectin lyase fold	NA		5
VEDA_01458	397	SEC	6.92±0.34	2.26e-54	peroxisomal (S)-2-hydroxy-acid oxidase	GO:0003824//GO:0010181//GO:0016491//GO:0055114	K00101	[PATH:ko00620]	IPR000262; FMN-dependent dehydrogenase//IPR008259; FMN-dependent alpha-hydroxy acid dehydrogenase, active site//IPR012133; Alpha-hydroxy acid dehydrogenase, FMN-dependent//IPR013785; Aldolase-type TIM barrel	NA		0
VEDA_01470	992	SEC	5.89±0.40	4.94e-58	beta-galactosidase	GO:0003824//GO:0004553//GO:0005975//GO:0043169	K01190	[PATH:ko00052][PATH:ko00600][PATH:ko00511]	IPR001944; Glycoside hydrolase, family 35//IPR008979; Galactose-binding domain-like//IPR013781; Glycoside hydrolase, subgroup, catalytic domain//IPR017853; Glycoside hydrolase, superfamily//IPR018954; Beta-galactosidase, domain 2//IPR019801; Glycoside hydrolase, family 35, conserved site//IPR025300; Beta-galactosidase jelly roll domain	NA		4
VEDA_01502	414	NCSP	0.66±0.06	4.76e-09	hypothetical protein	NA	NA	NA	NA	NA		29
VEDA_01584	351	SEC	6.59±0.39	1.64e-88	acetyl esterase	GO:0006629//GO:0016787//GO:0016788	NA	NA	IPR001087; Lipase, GDSL//IPR013830; Esterase, SGNH hydrolase-type//IPR013831; Esterase, SGNH hydrolase-type, subgroup	NA		4
VEDA_01625	179	SEC	1.56±0.08	2.91e-23	phosphatidylglycerol/phosphatidylinositol transfer protein	NA	NA	NA	IPR003172; MD-2-related lipid-recognition//IPR014756; Immunoglobulin E-set	NA		4
VEDA_01686	389	SEC	2.99±0.30	9.06e-81	phosphorylcholine phosphatase	NA	NA	NA	IPR023214; HAD-like domain	NA		2
VEDA_01746	895		2.73±0.39	5.42e-32	transmembrane mucin protein	NA	K11972	[BR:ko04121]	NA	NA		0
VEDA_01761	622	SEC	7.38±0.45	1.17e-142	glucoamylase P	GO:0000272//GO:0003824//GO:0004339//GO:0004553//GO:0005976//GO:0030246//GO:2001070	K01178	[PATH:ko00500]	IPR000165; Glucoamylase//IPR002044; Carbohydrate binding module family 20//IPR008291; Glucoamylase, starch-binding//IPR008928; Six-hairpin glycosidase-like//IPR011613; Glycoside hydrolase family 15//IPR012341; Six-hairpin glycosidase//IPR013783; Immunoglobulin-like fold//IPR013784; Carbohydrate-binding-like fold	NA		11
VEDA_01894	319	NCSP	0.52±0.02	6.49e-31	outer mitochondrial membrane protein porin	GO:0005741//GO:0006820//GO:0008308//GO:0044070//GO:0055085	K15040	[PATH:ko04020][PATH:ko05012][PATH:ko05016]	IPR001925; Porin, eukaryotic type	NA		1
VEDA_01895	584		0.41±0.05	7.57e-08	asparagine synthetase	GO:0004066//GO:0006529	K01953	[PATH:ko00910][PATH:ko00250][BR:ko01002]	IPR001962; Asparagine synthase//IPR006426; Asparagine synthase, glutamine-hydrolyzing//IPR014729; Rossmann-like alpha/beta/alpha sandwich fold//IPR017932; Glutamine amidotransferase, type II	NA		8
VEDA_01937	127	NCSP	0.58±0.06	5.37e-06	cytochrome b-c1 complex subunit 7	GO:0006122//GO:0008121	K00417	[PATH:ko00190][PATH:ko04260][PATH:ko05010][PATH:ko05012][PATH:ko05016]	IPR003197; Cytochrome d ubiquinol oxidase, 14kDa subunit	NA		1
VEDA_01940	400	SEC	2.67±0.16	1.21e-151	ecm33	NA	NA	NA	NA	NA		4
VEDA_01966	331		5.84±0.47	3.96e-06	dihydrodipicolinate synthase	GO:0003824//GO:0008152//GO:0016829	K01714	[PATH:ko00300]	IPR002220; Dihydrodipicolinate synthetase-like//IPR013785; Aldolase-type TIM barrel//IPR020624; Dihydrodipicolinate synthetase, conserved site	NA		2
VEDA_02215	682	SEC	2.15±0.18	8.78e-12	peptide-N4-(N-acetyl-beta-glucosaminyl)asparagine amidase A	NA	NA	NA	IPR021102; Peptide-N4-(N-acetyl-beta-glucosaminyl)asparagine amidase A	NA		6
VEDA_02246	444	SEC	3.45±0.23	5.03e-23	hypothetical protein	NA	K06238	[PATH:ko04512][BR:ko04516][PATH:ko04510][PATH:ko04974]	NA	NA		1
VEDA_02302	179	SEC	2.18±0.12	2e-106	DNase1 protein	NA	NA	NA	NA	NA		3
VEDA_02309	906		0.51±0.04	5.79e-07	paraplegin	GO:0000166//GO:0004222//GO:0005524//GO:0006508//GO:0008270//GO:0016020//GO:0016021//GO:0017111//GO:0030163	K08956	[BR:ko01002][BR:ko03110]	IPR000642; Peptidase M41//IPR003593; AAA+ ATPase domain//IPR003959; ATPase, AAA-type, core//IPR003960; ATPase, AAA-type, conserved site//IPR005936; Peptidase, FtsH//IPR011546; Peptidase M41, FtsH extracellular	PHI:226//PEX6//AAK16738//Colletotrichum lagenarium:NCBI_taxID=TX:5462//Loss of pathogenicity		4
VEDA_02364	176		1.71±0.11	7.74e-06	NADH-ubiquinone oxidoreductase 20.8 kDa subunit	NA	K03952	[PATH:ko00190][PATH:ko05010][PATH:ko05012][PATH:ko05016]	IPR016680; NADH dehydrogenase [ubiquinone] (complex I), alpha subcomplex, subunit 8	NA		8
VEDA_02366	269	SEC	3.12±0.13	6.08e-138	hypothetical protein	GO:0005576	K15071	[BR:ko04121]	IPR001283; Allergen V5/Tpx-1-related//IPR014044; CAP domain//IPR018244; Allergen V5/Tpx-1-related, conserved site	PHI:184//RBT4//AAG09789//Candida albicans:NCBI_taxID=TX:5476//Reduced virulence	Y	4
VEDA_02386	824	NCSP	0.40±0.20	3.51e-07	spermatogenesis-associated protein	GO:0003824	K06888	NA	IPR004879; Domain of unknown function DUF255//IPR008928; Six-hairpin glycosidase-like//IPR012336; Thioredoxin-like fold//IPR012341; Six-hairpin glycosidase	NA		9
VEDA_02399	472		1.71±0.06	4.97e-08	2-methylcitrate synthase	GO:0006099//GO:0044262//GO:0046912	K01647	[PATH:ko00020][PATH:ko00630]	IPR002020; Citrate synthase-like//IPR016141; Citrate synthase-like, core//IPR016142; Citrate synthase-like, large alpha subdomain//IPR019810; Citrate synthase active site	PHI:447//MCSA//CAI61947//Aspergillus fumigatus:NCBI_taxID=TX:5085//Reduced virulence		1
VEDA_02441	796	SEC	2.01±0.13	4.14e-101	glucan 1,3-beta-glucosidase	NA	K01210	[PATH:ko00500]	IPR011050; Pectin lyase fold/virulence factor//IPR012334; Pectin lyase fold	NA		13
VEDA_02444	376	SEC	2.73±0.32	3.23e-14	PAF acetylhydrolase family protein	NA	K01175	NA	NA	NA		3
VEDA_02455	504	SEC	2.32±0.09	4.98e-27	hypothetical protein	GO:0003824//GO:0008762//GO:0016491//GO:0016614//GO:0050660//GO:0055114	NA	NA	IPR006094; FAD linked oxidase, N-terminal//IPR012951; Berberine/berberine-like//IPR016166; FAD-binding, type 2//IPR016167; FAD-binding, type 2, subdomain 1//IPR016168; FAD-linked oxidase, FAD-binding, subdomain 2	NA		3
VEDA_02456	399	SEC	1.75±0.10	2.1e-12	YkgB	GO:0005515	NA	NA	IPR015943; WD40/YVTN repeat-like-containing domain//IPR019405; Lactonase, 7-bladed beta propeller	NA		3
VEDA_02460	568	SEC	4.55±0.16	1.19e-39	FAD binding domain-containing protein	GO:0003824//GO:0008762//GO:0016491//GO:0016614//GO:0050660//GO:0055114	K03380	[PATH:ko00627][PATH:ko00361][PATH:ko00623]	IPR006094; FAD linked oxidase, N-terminal//IPR012951; Berberine/berberine-like//IPR016166; FAD-binding, type 2//IPR016168; FAD-linked oxidase, FAD-binding, subdomain 2	PHI:716//ZEB1//ABB90284//Fusarium graminearum:NCBI_taxID=TX:5518//Unaffected pathogenicity		10
VEDA_02470	423	SEC	4.83±0.55	3.01e-11	fibronectin	NA	K01728	[PATH:ko00040]	IPR011050; Pectin lyase fold/virulence factor//IPR012334; Pectin lyase fold	NA		3
VEDA_02503	485	SEC	6.26±0.96	9.16e-20	exopolygalacturonase	GO:0004650//GO:0005975	K01213	[PATH:ko00040][PATH:ko00500]	IPR000743; Glycoside hydrolase, family 28//IPR011050; Pectin lyase fold/virulence factor//IPR012334; Pectin lyase fold	PHI:115//PGX1//AAC26146//Cochliobolus carbonum:NCBI_taxID=TX:5017//Unaffected pathogenicity		12
VEDA_02509	337	SEC	8.08±0.53	1.8e-173	pectate lyase	NA	K01728	[PATH:ko00040]	IPR002022; Pectate lyase/Amb allergen//IPR011050; Pectin lyase fold/virulence factor//IPR012334; Pectin lyase fold	PHI:222//PELB//AAD09857//Colletotrichum gloeosporioides:NCBI_taxID=TX:5457//Reduced virulence		3
VEDA_02526	369	SEC	2.40±0.05	3.07e-08	pectate lyase B	GO:0004553//GO:0005576//GO:0005975//GO:0030248	K01728	[PATH:ko00040]	IPR000254; Cellulose-binding domain, fungal//IPR002022; Pectate lyase/Amb allergen//IPR011050; Pectin lyase fold/virulence factor//IPR012334; Pectin lyase fold	PHI:222//PELB//AAD09857//Colletotrichum gloeosporioides:NCBI_taxID=TX:5457//Reduced virulence		8
VEDA_02588	487	SEC	2.36±0.32	4.24e-148	glucan 1,3-beta-glucosidase	GO:0003824//GO:0004553//GO:0005975//GO:0043169	K01238	NA	IPR000490; Glycoside hydrolase, family 17//IPR013781; Glycoside hydrolase, subgroup, catalytic domain//IPR017853; Glycoside hydrolase, superfamily	NA		2
VEDA_02612	243	SEC	6.87±0.93	0	pectate lyase	GO:0005576//GO:0030570	K01728	[PATH:ko00040]	IPR004898; Pectate lyase, catalytic//IPR011050; Pectin lyase fold/virulence factor//IPR012334; Pectin lyase fold	PHI:179//PELA//AAA33338//Nectria haematococca (related: Fusarium solani):NCBI_taxID=TX:140110//Reduced virulence		10
VEDA_02653	391	SEC	12.29±1.59	1.26e-192	hypothetical protein	NA	K06036	NA	IPR011050; Pectin lyase fold/virulence factor//IPR012334; Pectin lyase fold	NA		1
VEDA_02654	357	SEC	4.88±0.42	2.48e-25	hypothetical protein	GO:0016787	NA	NA	IPR013830; Esterase, SGNH hydrolase-type//IPR013831; Esterase, SGNH hydrolase-type, subgroup	NA		3
VEDA_02713	523		1.52±0.16	7.28e-07	succinyl-CoA:3-ketoacid-coenzyme A transferase subunit A	GO:0008152//GO:0008410//GO:0046952	K01027	[PATH:ko00650][PATH:ko00072][PATH:ko00280]	IPR004164; Coenzyme A transferase active site//IPR004165; Coenzyme A transferase//IPR012791; 3-oxoacid CoA-transferase, subunit B//IPR012792; 3-oxoacid CoA-transferase, subunit A//IPR014388; 3-oxoacid CoA-transferase	NA		7
VEDA_02783	235		1.59±0.09	6.12e-12	endoglucanase-1	GO:0000272//GO:0004553//GO:0008810	K01238	NA	IPR002594; Glycoside hydrolase, family 12//IPR008985; Concanavalin A-like lectin/glucanase//IPR013319; Glycoside hydrolase, family 11/12, catalytic domain	NA		1
VEDA_02801	525	SEC	2.54±0.22	1.4e-13	acetylcholinesterase	NA	K03927	[PATH:ko00983]	IPR002018; Carboxylesterase, type B//IPR019826; Carboxylesterase type B, active site	PHI:541//LIP1//AAU87359//Botrytis cinerea:NCBI_taxID=TX:332648//Unaffected pathogenicity		9
VEDA_02811	463	SEC	1.53±0.11	1.48e-12	1,3-beta-glucanosyltransferase gel1	GO:0003824//GO:0005975//GO:0043169	NA	NA	IPR004886; Glucanosyltransferase//IPR013781; Glycoside hydrolase, subgroup, catalytic domain//IPR017853; Glycoside hydrolase, superfamily	PHI:434//GEL2//EAL88984//Aspergillus fumigatus:NCBI_taxID=TX:5085//Reduced virulence		7
VEDA_02839	465	SEC	7.25±0.82	2.31e-86	alpha-galactosidase	GO:0003824//GO:0004553//GO:0005975//GO:0043169	K07407	[PATH:ko00052][PATH:ko00561][PATH:ko00600][PATH:ko00603]	IPR000111; Glycoside hydrolase, clan GH-D//IPR002241; Glycoside hydrolase, family 27//IPR013780; Glycosyl hydrolase, family 13, all-beta//IPR013785; Aldolase-type TIM barrel//IPR017853; Glycoside hydrolase, superfamily	NA		6
VEDA_02868	493	SEC	2.52±0.46	1.17e-06	aminopeptidase Y	GO:0004571//GO:0005509//GO:0006508//GO:0008233//GO:0016020	K01264	[BR:ko01002]	IPR001382; Glycoside hydrolase, family 47//IPR003137; Protease-associated domain, PA//IPR007484; Peptidase M28	NA		6
VEDA_02904	386	SEC	1.70±0.11	3.67e-33	hypothetical protein	GO:0003824//GO:0004553//GO:0005975//GO:0043169	K01238	NA	IPR000490; Glycoside hydrolase, family 17//IPR013781; Glycoside hydrolase, subgroup, catalytic domain//IPR017853; Glycoside hydrolase, superfamily	NA	Y	5
VEDA_03011	239	SEC	5.45±0.27	3.71e-38	25 kDa protein elicitor	NA	NA	NA	IPR008701; Necrosis inducing	PHI:741//BeNEP2//ABB43267//Botrytis elliptica:NCBI_taxID=TX:278938//Unaffected pathogenicity		2
VEDA_03026	496	NCSP	1.85±0.13	3.57e-10	aldehyde dehydrogenase	GO:0008152//GO:0016491//GO:0016620//GO:0055114	K00128	[PATH:ko00010][PATH:ko00040][PATH:ko00053][PATH:ko00620][PATH:ko00640][PATH:ko00071][PATH:ko00561][PATH:ko00280][PATH:ko00310][PATH:ko00330][PATH:ko00340][PATH:ko00380][PATH:ko00410][PATH:ko00903][PATH:ko00625]	IPR015590; Aldehyde dehydrogenase domain//IPR016160; Aldehyde dehydrogenase, conserved site//IPR016161; Aldehyde/histidinol dehydrogenase//IPR016162; Aldehyde dehydrogenase, N-terminal//IPR016163; Aldehyde dehydrogenase, C-terminal	NA		7
VEDA_03074	1276		1.96±0.08	1.78e-08	UBA domain-containing protein	GO:0005509//GO:0005515	K12472	[PATH:ko04144]	IPR000261; EPS15 homology (EH)//IPR000449; Ubiquitin-associated/translation elongation factor EF1B, N-terminal//IPR002048; Calcium-binding EF-hand//IPR009060; UBA-like//IPR011992; EF-hand-like domain//IPR015940; Ubiquitin-associated/translation elongation factor EF1B, N-terminal, eukaryote//IPR018249; EF-HAND 2	NA		2
VEDA_03111	834	SEC	9.08±0.62	0	xylosidase/arabinosidase	GO:0004553//GO:0005975	K12308	[PATH:ko00052]	IPR006710; Glycoside hydrolase, family 43//IPR023296; Glycosyl hydrolase family 43, five-bladed beta-propellor domain	NA		2
VEDA_03118	205		2.40±0.13	9.28e-06	hypothetical protein	NA	NA	NA	IPR011008; Dimeric alpha-beta barrel//IPR013097; Stress responsive alpha-beta barrel	NA		1
VEDA_03163	293	SEC	7.56±2.12	3.17e-13	rhamnogalacturonan acetylesterase	GO:0006629//GO:0016787//GO:0016788	K01066	[PATH:ko00960][PATH:ko00627][PATH:ko00363]	IPR001087; Lipase, GDSL//IPR013830; Esterase, SGNH hydrolase-type//IPR013831; Esterase, SGNH hydrolase-type, subgroup	NA		6
VEDA_03168	403	SEC	8.50±0.77	6.3e-225	endoglucanase	GO:0003824//GO:0004553//GO:0005576//GO:0005975//GO:0030248//GO:0043169	K01179	[PATH:ko00500]	IPR000254; Cellulose-binding domain, fungal//IPR001547; Glycoside hydrolase, family 5//IPR013781; Glycoside hydrolase, subgroup, catalytic domain//IPR017853; Glycoside hydrolase, superfamily	PHI:547//CEL5A//AAT40313//Botrytis cinerea:NCBI_taxID=TX:40559//Unaffected pathogenicity		6
VEDA_03229	350		2.43±0.22	9.87e-06	hypothetical protein	GO:0010181//GO:0016491//GO:0055114	NA	NA	IPR009002; FMN-binding split barrel-related//IPR012349; FMN-binding split barrel	NA	Y	4
VEDA_03250	440	SEC	9.11±1.27	7.29e-168	polygalacturonase	GO:0004650//GO:0005975	K01238	NA	IPR000743; Glycoside hydrolase, family 28//IPR011050; Pectin lyase fold/virulence factor//IPR012334; Pectin lyase fold	PHI:181//PGX1//AAK81847//Fusarium oxysporum:NCBI_taxID=TX:5507//Unaffected pathogenicity		13
VEDA_03251	420	SEC	5.46±0.80	2.68e-24	pectinesterase family protein	GO:0005618//GO:0030599//GO:0042545	K01051	[PATH:ko00040][PATH:ko00500]	IPR000070; Pectinesterase, catalytic//IPR011050; Pectin lyase fold/virulence factor//IPR012334; Pectin lyase fold	NA		6
VEDA_03423	906	SEC	5.28±0.52	1.19e-06	hypothetical protein	NA	K11244	[PATH:ko04011]	IPR002889; Carbohydrate-binding WSC//IPR013994; Carbohydrate-binding WSC, subgroup	NA		39
VEDA_03436	154		3.95±0.17	2.21e-23	superoxide dismutase	GO:0004784//GO:0006801//GO:0046872//GO:0055114	K04565	[PATH:ko04146][PATH:ko05014][PATH:ko05016][PATH:ko05020]	IPR001424; Superoxide dismutase, copper/zinc binding domain//IPR018152; Superoxide dismutase, copper/zinc, binding site//IPR024134; Superoxide dismutase (Cu/Zn) / chaperones	PHI:769//CPSOD1//CAC50073//Claviceps purpurea:NCBI_taxID=TX:5111//Unaffected pathogenicity		2
VEDA_03456	186		0.41±0.18	1.84e-06	ADP-ribosylation factor 6	GO:0005525//GO:0005622//GO:0006886//GO:0007264	K07941	[BR:ko04031][PATH:ko04144][PATH:ko04666]	IPR005225; Small GTP-binding protein domain//IPR006687; Small GTPase superfamily, SAR1-type//IPR006689; Small GTPase superfamily, ARF/SAR type//IPR024156; Small GTPase superfamily, ARF type	PHI:339//CLPT1//CAC41973//Colletotrichum lindemuthianum:NCBI_taxID=TX:290576//Reduced virulence		1
VEDA_03482	251	SEC	2.15±0.11	1.42e-25	conserved hypothetical protein	NA	NA	NA	IPR021851; Protein of unknown function DUF3455	NA		3
VEDA_03630	221	SEC	6.38±0.23	4.84e-47	endo-1,4-beta-xylanase I	GO:0004553//GO:0005975	K01181	NA	IPR001137; Glycoside hydrolase, family 11//IPR008985; Concanavalin A-like lectin/glucanase//IPR013319; Glycoside hydrolase, family 11/12, catalytic domain//IPR018208; Glycoside hydrolase, family 11, active site	PHI:567//XYL1 (related: XYN22)//AAC41683//Magnaporthe grisea:NCBI_taxID=TX:148305//Unaffected pathogenicity		1
VEDA_03687	374		6.64±0.86	2.06e-09	endoglucanase-4	NA	K01238	NA	IPR005103; Glycoside hydrolase, family 61	NA		5
VEDA_03690	499	SEC	8.45±1.20	1.32e-56	FAD binding domain-containing protein	GO:0003824//GO:0008762//GO:0016491//GO:0016614//GO:0050660//GO:0055114	NA	NA	IPR006094; FAD linked oxidase, N-terminal//IPR016166; FAD-binding, type 2//IPR016167; FAD-binding, type 2, subdomain 1//IPR016168; FAD-linked oxidase, FAD-binding, subdomain 2	NA		5
VEDA_03732	841	SEC	9.97±0.84	0	cellobiose dehydrogenase	GO:0003824//GO:0004553//GO:0005576//GO:0005975//GO:0016052//GO:0016614//GO:0030246//GO:0030248//GO:0050660//GO:0055114	NA	NA	IPR000172; Glucose-methanol-choline oxidoreductase, N-terminal//IPR000254; Cellulose-binding domain, fungal//IPR007867; Glucose-methanol-choline oxidoreductase, C-terminal//IPR008960; Carbohydrate-binding domain family 9-like//IPR015920; Cellobiose dehydrogenase, cytochrome	NA		13
VEDA_03745	552		0.50±0.07	1.45e-16	cobW domain-containing protein	NA	K14640	NA	IPR003495; Cobalamin (vitamin B12) biosynthesis CobW-like//IPR011629; Cobalamin (vitamin B12) biosynthesis CobW-like, C-terminal	NA		5
VEDA_03748	221	NCSP	2.41±0.20	2.58e-07	hypothetical protein	NA	NA	NA	IPR003848; Domain of unknown function DUF218//IPR014729; Rossmann-like alpha/beta/alpha sandwich fold	NA		2
VEDA_03771	666		0.65±0.04	1.01e-25	78 kDa glucose-regulated protein	GO:0005524	K09490	[BR:ko03110][PATH:ko03060][PATH:ko04141][PATH:ko05020]	IPR001023; Heat shock protein Hsp70//IPR013126; Heat shock protein 70//IPR018181; Heat shock protein 70, conserved site	NA		2
VEDA_03777	331	SEC	3.91±0.56	2.56e-23	endo-1,4-beta-xylanase	NA	NA	NA	IPR023296; Glycosyl hydrolase family 43, five-bladed beta-propellor domain	NA		1
VEDA_03783	1012		0.59±0.04	9.97e-49	hypothetical protein	NA	NA	NA	NA	NA		0
VEDA_03802	349	SEC	4.89±0.12	1.5e-16	hypothetical protein	GO:0016787	NA	NA	IPR013830; Esterase, SGNH hydrolase-type//IPR013831; Esterase, SGNH hydrolase-type, subgroup	NA	Y	6
VEDA_03832	561	SEC	4.04±0.39	1.64e-20	gamma-glutamyltranspeptidase	GO:0003840	K00681	[PATH:ko00590][PATH:ko00430][PATH:ko00460][PATH:ko00480][BR:ko01002][BR:ko04090]	IPR000101; Gamma-glutamyltranspeptidase	NA		3
VEDA_03868	486		1.54±0.05	1.18e-07	alanine aminotransferase	GO:0003824//GO:0009058//GO:0016769//GO:0016847//GO:0030170//GO:0042218	K00814	[PATH:ko00710][PATH:ko00250][BR:ko01007]	IPR001176; 1-aminocyclopropane-1-carboxylate synthase//IPR004839; Aminotransferase, class I/classII//IPR015421; Pyridoxal phosphate-dependent transferase, major region, subdomain 1//IPR015422; Pyridoxal phosphate-dependent transferase, major region, subdomain 2//IPR015424; Pyridoxal phosphate-dependent transferase, major domain	NA		8
VEDA_03875	556	SEC	3.42±0.26	0	lipase	NA	K01046	[PATH:ko00561]	IPR002018; Carboxylesterase, type B//IPR019819; Carboxylesterase type B, conserved site//IPR019826; Carboxylesterase type B, active site	PHI:541//LIP1//AAU87359//Botrytis cinerea:NCBI_taxID=TX:332648//Unaffected pathogenicity		5
VEDA_03908	774		8.69±0.81	4.84e-292	beta-glucosidase	GO:0004553//GO:0005975	K01188	[PATH:ko00500][PATH:ko00460][PATH:ko00940]	IPR001764; Glycoside hydrolase, family 3, N-terminal//IPR002772; Glycoside hydrolase family 3 C-terminal domain//IPR017853; Glycoside hydrolase, superfamily	NA		6
VEDA_03939	859	NCSP	4.00±0.24	0	putative glycosyl hydrolase family 81	GO:0016998//GO:0033903	K01180	NA	IPR005200; Glycoside hydrolase, family 81	NA		1
VEDA_03951	151	NCSP	0.55±0.10	9.55e-06	ubiquinol-cytochrome c reductase complex subunit	GO:0006122//GO:0008121	K00416	[PATH:ko00190][PATH:ko04260][PATH:ko05010][PATH:ko05012][PATH:ko05016]	IPR003422; Cytochrome b-c1 complex, subunit 6//IPR023184; Ubiquinol-cytochrome C reductase hinge domain	NA		6
VEDA_03958	721	SEC	10.40±1.07	1.88e-143	neutral ceramidase	NA	K01441	[PATH:ko00600]	IPR006823; Neutral/alkaline nonlysosomal ceramidase	NA		6
VEDA_04046	403	SEC	2.83±0.12	9.39e-202	allergen rAsp f9-like protein	GO:0004553//GO:0005618//GO:0005975//GO:0007047//GO:0016798	K01238	NA	IPR000757; Glycoside hydrolase, family 16//IPR008985; Concanavalin A-like lectin/glucanase//IPR013320; Concanavalin A-like lectin/glucanase, subgroup//IPR017168; Glycoside hydrolase, family 16, CRH1, predicted	NA		4
VEDA_04096	345		2.94±0.36	8.89e-23	fructose-1,6-bisphosphatase	GO:0005975//GO:0042578	K03841	[PATH:ko00010][PATH:ko00030][PATH:ko00051][PATH:ko00710][PATH:ko00680][PATH:ko04910]	IPR000146; Fructose-1,6-bisphosphatase class 1/Sedoheputulose-1,7-bisphosphatase//IPR020548; Fructose-1,6-bisphosphatase, active site	NA		4
VEDA_04186	251		1.51±0.13	1.11e-06	ribulose-phosphate 3-epimerase	GO:0003824//GO:0004750//GO:0005975//GO:0008152	K01783	[PATH:ko00030][PATH:ko00040][PATH:ko00710]	IPR000056; Ribulose-phosphate 3-epimerase//IPR011060; Ribulose-phosphate binding barrel//IPR013785; Aldolase-type TIM barrel	NA		4
VEDA_04228	1097	SEC	1.60±0.09	5.09e-23	WSC domain-containing protein	NA	K00799	[PATH:ko00480][PATH:ko00980][PATH:ko00982]	IPR002889; Carbohydrate-binding WSC//IPR009880; Glyoxal oxidase, N-terminal//IPR011043; Galactose oxidase/kelch, beta-propeller//IPR013783; Immunoglobulin-like fold//IPR013994; Carbohydrate-binding WSC, subgroup//IPR014756; Immunoglobulin E-set//IPR015202; Domain of unknown function DUF1929//IPR015916; Galactose oxidase, beta-propeller	NA		47
VEDA_04232	266		4.47±0.32	2.82e-24	cytosolic Cu/Zn superoxide dismutase	GO:0006801//GO:0046872//GO:0055114	K00518	NA	IPR001424; Superoxide dismutase, copper/zinc binding domain	PHI:383//SOD5//EAL00626//Candida albicans:NCBI_taxID=TX:5476//Loss of pathogenicity		5
VEDA_04298	434	SEC	5.59±0.62	1.96e-30	lipolytic enzyme	GO:0016787	NA	NA	IPR013830; Esterase, SGNH hydrolase-type//IPR013831; Esterase, SGNH hydrolase-type, subgroup	NA		1
VEDA_04303	601	SEC	8.31±0.56	1.79e-179	hypothetical protein	NA	NA	NA	NA	NA		2
VEDA_04309	566		0.64±0.02	3.21e-12	hypothetical protein	GO:0005509//GO:0005783//GO:0006457//GO:0051082	K08054	[BR:ko03110][PATH:ko04141][BR:ko04091][PATH:ko04145][PATH:ko04612]	IPR001580; Calreticulin/calnexin//IPR008985; Concanavalin A-like lectin/glucanase//IPR009033; Calreticulin/calnexin, P//IPR013320; Concanavalin A-like lectin/glucanase, subgroup//IPR018124; Calreticulin/calnexin, conserved site	NA		4
VEDA_04379	539		2.21±0.18	3.6e-07	oxysterol-binding protein	NA	NA	NA	IPR000648; Oxysterol-binding protein//IPR018494; Oxysterol-binding protein, conserved site	NA		4
VEDA_04409	495	SEC	2.45±0.08	4.65e-12	aminopeptidase Y	GO:0004571//GO:0005509//GO:0006508//GO:0008233//GO:0016020	K01269	NA	IPR001382; Glycoside hydrolase, family 47//IPR003137; Protease-associated domain, PA//IPR007484; Peptidase M28	NA		4
VEDA_04465	697	SEC	2.09±0.12	3.77e-14	hypothetical protein	GO:0000166//GO:0004190//GO:0006508//GO:0008152//GO:0016491	K01489	[PATH:ko00240][PATH:ko00983]	IPR001461; Peptidase A1//IPR002198; Short-chain dehydrogenase/reductase SDR//IPR002347; Glucose/ribitol dehydrogenase//IPR009007; Peptidase aspartic, catalytic//IPR016040; NAD(P)-binding domain//IPR021109; Peptidase aspartic	NA		10
VEDA_04479	254	SEC	2.33±0.18	6.37e-58	hypothetical protein	NA	NA	NA	IPR018466; Cell wall beta-glucan synthesis	NA		1
VEDA_04512	316	SEC	3.57±0.15	3.35e-20	mixed-linked glucanase	GO:0004553//GO:0005975	K01180	NA	IPR000757; Glycoside hydrolase, family 16//IPR008985; Concanavalin A-like lectin/glucanase//IPR013320; Concanavalin A-like lectin/glucanase, subgroup	NA		8
VEDA_04586	474	SEC	2.22±0.04	3.06e-07	chitinase	GO:0003824//GO:0004553//GO:0004568//GO:0005975//GO:0006032//GO:0043169	K01183	[PATH:ko00520]	IPR001223; Glycoside hydrolase, family 18, catalytic domain//IPR001579; Glycoside hydrolase, chitinase active site//IPR011583; Chitinase II//IPR013781; Glycoside hydrolase, subgroup, catalytic domain//IPR017853; Glycoside hydrolase, superfamily	PHI:144//CHT42//AAC05829//Trichoderma virens:NCBI_taxID=TX:29875//Reduced virulence		2
VEDA_04602	187	SEC	1.80±0.10	4.33e-26	hypothetical protein	NA	NA	NA	NA	NA		0
VEDA_04609	218	SEC	4.85±0.14	3.48e-125	hypothetical protein	NA	NA	NA	NA	PHI:350//EMP1//AAR06609//Magnaporthe grisea:NCBI_taxID=TX:148305//Reduced virulence		0
VEDA_04614	341	SEC	2.82±0.23	2.46e-26	rare lipoprotein A	GO:0042742//GO:0050832	K01179	[PATH:ko00500]	IPR001153; Barwin//IPR007112; Expansin/pollen allergen, DPBB domain//IPR007117; Pollen allergen/expansin, C-terminal//IPR009009; Barwin-related endoglucanase//IPR014733; Barwin-like endoglucanase	NA		7
VEDA_04719	838	SEC	5.10±0.99	1.75e-10	endo-1,3(4)-beta-glucanase	GO:0016998//GO:0033903	K01180	NA	IPR005200; Glycoside hydrolase, family 81//IPR010916; TonB box, conserved site	NA		0
VEDA_04771	331	SEC	7.74±0.88	7.62e-111	pectate lyase B	NA	K01728	[PATH:ko00040]	IPR002022; Pectate lyase/Amb allergen//IPR011050; Pectin lyase fold/virulence factor//IPR012334; Pectin lyase fold	PHI:222//PELB//AAD09857//Colletotrichum gloeosporioides:NCBI_taxID=TX:5457//Reduced virulence		2
VEDA_04924	341	SEC	1.62±0.13	3.49e-19	hypothetical protein	GO:0008152//GO:0016491	K00505	[PATH:ko00350][PATH:ko00740][PATH:ko00950][PATH:ko00965][PATH:ko04916]	IPR002227; Tyrosinase//IPR008922; Uncharacterised domain, di-copper centre	NA	Y	10
VEDA_04928	247		2.17±0.08	3.19e-89	polysaccharide deacetylase family protein	GO:0003824//GO:0005975//GO:0016810	K01452	[PATH:ko00520]	IPR002509; Polysaccharide deacetylase//IPR011330; Glycoside hydrolase/deacetylase, beta/alpha-barrel	NA		3
VEDA_04950	487	SEC	2.41±0.18	6.44e-11	1,3-beta-glucanosyltransferase gel2	GO:0003824//GO:0005975//GO:0043169	NA	NA	IPR004886; Glucanosyltransferase//IPR013781; Glycoside hydrolase, subgroup, catalytic domain//IPR017853; Glycoside hydrolase, superfamily	PHI:434//GEL2//EAL88984//Aspergillus fumigatus:NCBI_taxID=TX:5085//Reduced virulence		6
VEDA_04966	401	SEC	8.54±0.66	4.94e-295	mannan endo-1,4-beta-mannosidase	GO:0003824//GO:0004553//GO:0005975//GO:0043169	K01567	NA	IPR001547; Glycoside hydrolase, family 5//IPR013781; Glycoside hydrolase, subgroup, catalytic domain//IPR017853; Glycoside hydrolase, superfamily	NA		5
VEDA_04969	314	SEC	17.07±2.02	2.84e-07	feruloyl esterase B	GO:0005576	K01567	NA	IPR010126; Esterase, PHB depolymerase	NA		7
VEDA_04992	352		4.98±0.62	7.03e-10	alcohol dehydrogenase	GO:0000166//GO:0008270//GO:0016491//GO:0016747//GO:0055114	K13953	[PATH:ko00010][PATH:ko00071][PATH:ko00350][PATH:ko00830][PATH:ko00625][PATH:ko00626][PATH:ko00980][PATH:ko00982]	IPR002085; Alcohol dehydrogenase superfamily, zinc-type//IPR002328; Alcohol dehydrogenase, zinc-type, conserved site//IPR011032; GroES-like//IPR013149; Alcohol dehydrogenase, C-terminal//IPR013154; Alcohol dehydrogenase GroES-like//IPR016040; NAD(P)-binding domain//IPR020843; Polyketide synthase, enoylreductase	NA		9
VEDA_05018	310		0.59±0.06	9.23e-50	ADP,ATP carrier protein	GO:0005215//GO:0005488//GO:0005743//GO:0006810//GO:0055085	K05863	[PATH:ko04020][PATH:ko05012][PATH:ko05016]	IPR002067; Mitochondrial carrier protein//IPR002113; Adenine nucleotide translocator 1//IPR018108; Mitochondrial substrate/solute carrier//IPR023395; Mitochondrial carrier domain	NA		1
VEDA_05049	322	SEC	9.05±2.04	7.66e-14	pectate lyase	NA	K01728	[PATH:ko00040]	IPR002022; Pectate lyase/Amb allergen//IPR011050; Pectin lyase fold/virulence factor//IPR012334; Pectin lyase fold	PHI:222//PELB//AAD09857//Colletotrichum gloeosporioides:NCBI_taxID=TX:5457//Reduced virulence		2		Y
VEDA_05193	371	SEC	5.15±1.01	7.5e-51	hypothetical protein	NA	NA	NA	IPR011051; Cupin, RmlC-type//IPR013096; Cupin 2, conserved barrel//IPR014710; RmlC-like jelly roll fold	NA		1
VEDA_05200	218	SEC	1.74±0.12	2.35e-37	hypothetical protein	GO:0004553//GO:0005975	K01181	NA	IPR001137; Glycoside hydrolase, family 11//IPR008985; Concanavalin A-like lectin/glucanase//IPR013319; Glycoside hydrolase, family 11/12, catalytic domain//IPR018208; Glycoside hydrolase, family 11, active site	PHI:546//XYN11A//AAZ03776//Botrytis cinerea:NCBI_taxID=TX:332648//Reduced virulence		0
VEDA_05211	716		3.16±0.14	4.2e-85	mixed-linked glucanase	GO:0004553//GO:0005975	K01180	NA	IPR000757; Glycoside hydrolase, family 16//IPR002889; Carbohydrate-binding WSC//IPR008985; Concanavalin A-like lectin/glucanase//IPR013320; Concanavalin A-like lectin/glucanase, subgroup//IPR013994; Carbohydrate-binding WSC, subgroup	NA		21
VEDA_05351	410	SEC	3.99±0.30	1.65e-18	aldose 1-epimerase	GO:0003824//GO:0005975//GO:0016853//GO:0019318//GO:0030246	K01785	[PATH:ko00010]	IPR008183; Aldose 1-/Glucose-6-phosphate 1-epimerase//IPR011013; Glycoside hydrolase-type carbohydrate-binding//IPR014718; Glycoside hydrolase-type carbohydrate-binding, subgroup//IPR015443; Aldose 1-epimerase	NA		6
VEDA_05361	269		1.55±0.15	1.39e-08	putative proteasome A-type and B-type	GO:0004175//GO:0004298//GO:0005839//GO:0006511//GO:0019773//GO:0051603	K02726	[BR:ko01002][PATH:ko03050][BR:ko03051]	IPR000426; Proteasome, alpha-subunit, N-terminal domain//IPR001353; Proteasome, subunit alpha/beta//IPR023332; Proteasome A-type subunit	NA		0
VEDA_05409	239	SEC	6.85±0.58	3.8e-69	necrosis- and ethylene-inducing protein	NA	NA	NA	IPR008701; Necrosis inducing	PHI:740//BeNEP1//ABB43265//Botrytis elliptica:NCBI_taxID=TX:278938//Unaffected pathogenicity		2
VEDA_05527	222		6.06±2.12	8.13e-08	cytochrome b2	GO:0003824//GO:0010181//GO:0016491//GO:0055114	K00101	[PATH:ko00620]	IPR000262; FMN-dependent dehydrogenase//IPR008259; FMN-dependent alpha-hydroxy acid dehydrogenase, active site//IPR012133; Alpha-hydroxy acid dehydrogenase, FMN-dependent//IPR013785; Aldolase-type TIM barrel	NA		2
VEDA_05547	388	SEC	10.88±2.66	4.06e-11	starch binding domain-containing protein	GO:0030246//GO:2001070	K01178	[PATH:ko00500]	IPR002044; Carbohydrate binding module family 20//IPR013783; Immunoglobulin-like fold//IPR013784; Carbohydrate-binding-like fold//IPR015902; Alpha amylase	NA		5
VEDA_05560	124		0.22±0.09	8.78e-07	NADH-ubiquinone oxidoreductase 14.8 kDa subunit	NA	K03950	[PATH:ko00190][PATH:ko05010][PATH:ko05012][PATH:ko05016]	IPR016488; NADH dehydrogenase [ubiquinone] (complex I), alpha subcomplex, subunit 6	NA		0
VEDA_05572	409	SEC	7.29±0.14	2.68e-59	beta-1,6-endoglucanase	GO:0003824//GO:0004553//GO:0005975//GO:0043169	K01238	NA	IPR001547; Glycoside hydrolase, family 5//IPR013781; Glycoside hydrolase, subgroup, catalytic domain//IPR017853; Glycoside hydrolase, superfamily	PHI:323//VFGLU1//AAO63562//Verticillium fungicola:NCBI_taxID=TX:93591//Reduced virulence		5
VEDA_05701	330	SEC	9.33±0.91	1.05e-99	pectinesterase	GO:0005618//GO:0030599//GO:0042545	K01051	[PATH:ko00040][PATH:ko00500]	IPR000070; Pectinesterase, catalytic//IPR011050; Pectin lyase fold/virulence factor//IPR012334; Pectin lyase fold//IPR018040; Pectinesterase, active site	PHI:1028//bcpme1//CAC29255//Botrytis cinerea:NCBI_taxID=TX:40559//Reduced virulence		6
VEDA_05702	274	SEC	7.42±0.76	8.3e-116	rhamnogalacturonan acetylesterase	GO:0016787	K01066	[PATH:ko00960][PATH:ko00627][PATH:ko00363]	IPR013830; Esterase, SGNH hydrolase-type//IPR013831; Esterase, SGNH hydrolase-type, subgroup	NA		4
VEDA_05753	271	SEC	1.99±0.03	3.95e-07	carbonic anhydrase	NA	K01674	[PATH:ko00910]	IPR001148; Alpha carbonic anhydrase//IPR023561; Carbonic anhydrase, alpha-class	NA		3
VEDA_05769	307	SEC	1.81±0.12	6.75e-18	endoglucanase-1	GO:0000272//GO:0004553//GO:0005576//GO:0005975//GO:0008810//GO:0030248	K01238	NA	IPR000254; Cellulose-binding domain, fungal//IPR002594; Glycoside hydrolase, family 12//IPR008985; Concanavalin A-like lectin/glucanase//IPR013319; Glycoside hydrolase, family 11/12, catalytic domain	PHI:569//XYL3//AAC06239//Fusarium oxysporum:NCBI_taxID=TX:5507//Unaffected pathogenicity		10
VEDA_05861	481	SEC	6.79±0.64	4.64e-50	glycoside hydrolase	GO:0004650//GO:0005975	NA	NA	IPR000743; Glycoside hydrolase, family 28//IPR011050; Pectin lyase fold/virulence factor//IPR012334; Pectin lyase fold	NA		2
VEDA_05870	407	SEC	1.74±0.08	6.14e-21	sulphydryl oxidase	GO:0016491//GO:0055114	K00540	NA	IPR000103; Pyridine nucleotide-disulphide oxidoreductase, class-II//IPR013027; FAD-dependent pyridine nucleotide-disulphide oxidoreductase//IPR023753; Pyridine nucleotide-disulphide oxidoreductase, FAD/NAD(P)-binding domain	NA		2
VEDA_05881	492	SEC	11.68±0.54	0	hypothetical protein	GO:0003824//GO:0004553//GO:0005576//GO:0005975//GO:0030248//GO:0043169	K01567	NA	IPR000254; Cellulose-binding domain, fungal//IPR001547; Glycoside hydrolase, family 5//IPR013781; Glycoside hydrolase, subgroup, catalytic domain//IPR017853; Glycoside hydrolase, superfamily	PHI:569//XYL3//AAC06239//Fusarium oxysporum:NCBI_taxID=TX:5507//Unaffected pathogenicity		6
VEDA_05899	236	SEC	13.09±0.93	5.51e-64	pectate lyase C	GO:0005576//GO:0030570	K01728	[PATH:ko00040]	IPR004898; Pectate lyase, catalytic//IPR011050; Pectin lyase fold/virulence factor//IPR012334; Pectin lyase fold	PHI:180//PELD//AAC49420//Nectria haematococca (related: Fusarium solani):NCBI_taxID=TX:140110//Reduced virulence		14
VEDA_05900	616	SEC	2.83±0.21	0	choline dehydrogenase	GO:0006066//GO:0008812//GO:0016614//GO:0050660//GO:0055114	K00108	[PATH:ko00260]	IPR000172; Glucose-methanol-choline oxidoreductase, N-terminal//IPR007867; Glucose-methanol-choline oxidoreductase, C-terminal//IPR012132; Glucose-methanol-choline oxidoreductase	PHI:922//um03615////Ustilago maydis:NCBI_taxID=TX:5270//Unaffected pathogenicity		4
VEDA_05925	377	SEC	1.74±0.18	4.86e-19	pectin lyase	NA	K01732	NA	IPR002022; Pectate lyase/Amb allergen//IPR011050; Pectin lyase fold/virulence factor//IPR012334; Pectin lyase fold	NA		6
VEDA_05926	382	SEC	2.49±0.14	9.58e-21	hydroxyacid oxidase	GO:0003824//GO:0010181//GO:0016491//GO:0055114	K00101	[PATH:ko00620]	IPR000262; FMN-dependent dehydrogenase//IPR012133; Alpha-hydroxy acid dehydrogenase, FMN-dependent//IPR013785; Aldolase-type TIM barrel	NA		1
VEDA_05952	345		0.66±0.04	6.53e-22	pyrimidine precursor biosynthesis enzyme THI11	NA	K02051	[BR:ko02000][PATH:ko02010]	IPR015168; NMT1/THI5-like	NA		7
VEDA_05953	479	SEC	14.09±1.29	0	exoglucanase-6A	GO:0004553//GO:0005576//GO:0005975//GO:0030245//GO:0030248	K01238	NA	IPR000254; Cellulose-binding domain, fungal//IPR001524; Glycoside hydrolase, family 6, conserved site//IPR016288; 1, 4-beta cellobiohydrolase	PHI:569//XYL3//AAC06239//Fusarium oxysporum:NCBI_taxID=TX:5507//Unaffected pathogenicity		11
VEDA_05969	541		2.61±0.17	1.24e-124	1,3-beta-glucanosyltransferase gel4	GO:0003824//GO:0005975//GO:0043169	NA	NA	IPR004886; Glucanosyltransferase//IPR012946; X8//IPR013781; Glycoside hydrolase, subgroup, catalytic domain//IPR017853; Glycoside hydrolase, superfamily	PHI:522//GAS1//AAX78216//Fusarium oxysporum:NCBI_taxID=TX:5507//Reduced virulence		14
VEDA_05978	445	SEC	5.10±0.71	4.22e-06	carboxypeptidase A	GO:0004181//GO:0006508//GO:0008270	NA	NA	IPR000834; Peptidase M14, carboxypeptidase A	NA		7
VEDA_05997	402		0.52±0.04	1.14e-10	Delta(12) fatty acid desaturase	GO:0006629	K10256	[PATH:ko01040][BR:ko01004]	IPR005804; Fatty acid desaturase, type 1	NA		4
VEDA_05998	434	SEC	8.90±0.63	1.43e-11	glucanase B	NA	NA	NA	NA	NA		7
VEDA_06054	323	SEC	6.71±0.58	3.1e-49	endoglucanase-4	GO:0004553//GO:0005576//GO:0005975//GO:0030248	K01179	[PATH:ko00500]	IPR000254; Cellulose-binding domain, fungal//IPR005103; Glycoside hydrolase, family 61	PHI:569//XYL3//AAC06239//Fusarium oxysporum:NCBI_taxID=TX:5507//Unaffected pathogenicity		8
VEDA_06059	468	SEC	0.55±0.07	3.97e-13	hypothetical protein	NA	NA	NA	IPR002889; Carbohydrate-binding WSC	NA		38
VEDA_06060	388	SEC	8.46±1.57	3.61e-60	cell wall glycosyl hydrolase YteR	GO:0003824	NA	NA	IPR008928; Six-hairpin glycosidase-like//IPR010905; Glycosyl hydrolase, family 88//IPR012341; Six-hairpin glycosidase	NA		1
VEDA_06126	190		0.51±0.12	1.19e-23	isochorismatase hydrolase	GO:0003824//GO:0008152	K05993	[PATH:ko01053]	IPR000868; Isochorismatase-like	NA		1
VEDA_06143	1527	SEC	2.13±0.35	3.29e-07	hypothetical protein	NA	K00771	[BR:ko01003][PATH:ko00532][PATH:ko00534]	IPR002889; Carbohydrate-binding WSC//IPR011047; Quinonprotein alcohol dehydrogenase-like//IPR013994; Carbohydrate-binding WSC, subgroup	NA		40
VEDA_06145	161	SEC	5.12±0.52	1.13e-09	hypothetical protein	NA	K07567	NA	IPR006175; YjgF/Yer057p/UK114 family//IPR013813; Endoribonuclease L-PSP/chorismate mutase-like	NA		2
VEDA_06280	572	NCSP	1.61±0.14	2e-11	hypothetical protein	NA	NA	NA	NA	NA		5
VEDA_06283	383	SEC	8.75±0.71	1.58e-253	BNR/Asp-box repeat domain-containing protein	NA	NA	NA	IPR011040; Neuraminidase	NA		1
VEDA_06347	832	SEC	9.99±1.45	8.59e-11	periplasmic beta-glucosidase/beta-xylosidase	GO:0004553//GO:0005975	K05349	[PATH:ko00500][PATH:ko00460][PATH:ko00940]	IPR001764; Glycoside hydrolase, family 3, N-terminal//IPR002772; Glycoside hydrolase family 3 C-terminal domain//IPR017853; Glycoside hydrolase, superfamily	NA		2
VEDA_06395	598	SEC	1.82±0.08	1.84e-273	isoamyl alcohol oxidase	GO:0003824//GO:0008762//GO:0016491//GO:0016614//GO:0050660//GO:0055114	K03380	[PATH:ko00627][PATH:ko00361][PATH:ko00623]	IPR006094; FAD linked oxidase, N-terminal//IPR012951; Berberine/berberine-like//IPR016166; FAD-binding, type 2//IPR016168; FAD-linked oxidase, FAD-binding, subdomain 2	PHI:716//ZEB1//ABB90284//Fusarium graminearum:NCBI_taxID=TX:5518//Unaffected pathogenicity		10
VEDA_06447	845	SEC	10.55±1.01	0	Cel74a	GO:0004553//GO:0005515//GO:0005576//GO:0005975//GO:0030248	K01238	NA	IPR000254; Cellulose-binding domain, fungal//IPR015943; WD40/YVTN repeat-like-containing domain	PHI:569//XYL3//AAC06239//Fusarium oxysporum:NCBI_taxID=TX:5507//Unaffected pathogenicity		4
VEDA_06525	958	NCSP	0.64±0.11	8.89e-07	importin alpha re-exporter	GO:0005488//GO:0005515//GO:0006886//GO:0008565	NA	NA	IPR001494; Importin-beta, N-terminal//IPR005043; CAS/CSE, C-terminal//IPR011989; Armadillo-like helical//IPR013713; Exportin/Importin, Cse1-like//IPR016024; Armadillo-type fold	NA		7
VEDA_06755	317	NCSP	8.54±0.41	3.01e-158	endoglucanase II	GO:0004553//GO:0005576//GO:0005975//GO:0030248	K01238	NA	IPR000254; Cellulose-binding domain, fungal//IPR005103; Glycoside hydrolase, family 61	PHI:569//XYL3//AAC06239//Fusarium oxysporum:NCBI_taxID=TX:5507//Unaffected pathogenicity		8
VEDA_06759	553		1.80±0.24	7.43e-06	high-affinity methionine permease	GO:0003333//GO:0015171//GO:0016020	NA	NA	IPR002293; Amino acid/polyamine transporter I	NA		3
VEDA_06795	452	NCSP	6.11±0.32	1.69e-21	carboxylesterase	NA	K01066	[PATH:ko00960][PATH:ko00627][PATH:ko00363]	IPR002018; Carboxylesterase, type B//IPR019826; Carboxylesterase type B, active site	PHI:541//LIP1//AAU87359//Botrytis cinerea:NCBI_taxID=TX:332648//Unaffected pathogenicity		7
VEDA_06932	724		3.30±0.20	2.85e-35	UTR2 protein	GO:0004553//GO:0005975	K01238	NA	IPR000757; Glycoside hydrolase, family 16//IPR008985; Concanavalin A-like lectin/glucanase//IPR013320; Concanavalin A-like lectin/glucanase, subgroup	NA		11
VEDA_06982	235	SEC	1.98±0.19	7.57e-09	hypothetical protein	NA	NA	NA	NA	NA	Y	4
VEDA_06992	432	SEC	2.69±0.39	2.29e-28	endothiapepsin	GO:0004190//GO:0006508	K06004	[BR:ko01002]	IPR001461; Peptidase A1//IPR001969; Peptidase aspartic, active site//IPR009007; Peptidase aspartic, catalytic//IPR021109; Peptidase aspartic	PHI:697//ugt51E1//AAM81358//Leptosphaeria maculans:NCBI_taxID=TX:5022//Unaffected pathogenicity		3
VEDA_06995	641	SEC	1.76±0.16	1.32e-17	choline dehydrogenase	GO:0006066//GO:0008812//GO:0016614//GO:0050660//GO:0055114	K00108	[PATH:ko00260]	IPR000172; Glucose-methanol-choline oxidoreductase, N-terminal//IPR007867; Glucose-methanol-choline oxidoreductase, C-terminal//IPR012132; Glucose-methanol-choline oxidoreductase	NA		5
VEDA_07049	265		0.60±0.08	2.07e-12	L-xylulose reductase	GO:0000166//GO:0008152//GO:0016491	K00540	NA	IPR002198; Short-chain dehydrogenase/reductase SDR//IPR002347; Glucose/ribitol dehydrogenase//IPR016040; NAD(P)-binding domain	PHI:1100//Mdh1//AAX14688//Stagonospora nodorum:NCBI_taxID=TX:13684//Unaffected pathogenicity		4
VEDA_07067	189		0.47±0.03	3.43e-09	small COPII coat GTPase SAR1	GO:0005525//GO:0005622//GO:0006886//GO:0007264	K07953	[PATH:ko04141][BR:ko04031]	IPR005225; Small GTP-binding protein domain//IPR006687; Small GTPase superfamily, SAR1-type//IPR006689; Small GTPase superfamily, ARF/SAR type//IPR024156; Small GTPase superfamily, ARF type	NA		0
VEDA_07123	355	SEC	7.80±0.78	0	hypothetical protein	NA	NA	NA	IPR011050; Pectin lyase fold/virulence factor	NA	Y	7
VEDA_07143	893	SEC	2.90±0.18	8.8e-19	beta-glucosidase	GO:0004553//GO:0005975	K05349	[PATH:ko00500][PATH:ko00460][PATH:ko00940]	IPR001764; Glycoside hydrolase, family 3, N-terminal//IPR002772; Glycoside hydrolase family 3 C-terminal domain//IPR017853; Glycoside hydrolase, superfamily//IPR019800; Glycoside hydrolase, family 3, active site	PHI:748//um00446//Not available//Ustilago maydis:NCBI_taxID=TX:5270//Unaffected pathogenicity		5
VEDA_07148	792	SEC	4.10±0.48	2.17e-27	glucan 1,3-beta-glucosidase	NA	K01210	[PATH:ko00500]	IPR011050; Pectin lyase fold/virulence factor//IPR012334; Pectin lyase fold	NA		12
VEDA_07153	498	SEC	4.63±0.41	7.24e-25	galactan 1,3-beta-galactosidase	GO:0004553//GO:0005975	NA	NA	IPR006710; Glycoside hydrolase, family 43//IPR023296; Glycosyl hydrolase family 43, five-bladed beta-propellor domain	NA		2
VEDA_07157	460		1.70±0.24	1.2e-08	xaa-Pro dipeptidase	GO:0004177//GO:0009987//GO:0030145	K14213	[BR:ko01002]	IPR000994; Peptidase M24, structural domain//IPR007865; Aminopeptidase P N-terminal domain	NA		6
VEDA_07180	320	SEC	14.17±1.26	5.14e-173	fungal cellulose binding domain-containing protein	GO:0006629//GO:0016788	NA	NA	IPR001087; Lipase, GDSL//IPR013830; Esterase, SGNH hydrolase-type	NA		3
VEDA_07183	748	SEC	6.37±1.04	8.66e-07	hypothetical protein	NA	K11728	[BR:ko03036]	NA	NA		9
VEDA_07216	478		2.14±0.39	7.66e-12	hypothetical protein	GO:0016020	NA	NA	IPR005052; Legume-like lectin//IPR008985; Concanavalin A-like lectin/glucanase//IPR013320; Concanavalin A-like lectin/glucanase, subgroup	NA		2
VEDA_07224	476	SEC	8.19±0.50	2.6e-80	hypothetical protein	NA	NA	NA	IPR017853; Glycoside hydrolase, superfamily	NA		6
VEDA_07226	512		1.51±0.03	3.65e-23	WSC domain-containing protein	NA	K01238	NA	IPR018535; Domain of unknown function DUF1996	NA		10
VEDA_07229	320	SEC	7.92±0.77	6.21e-58	arabinan endo-1,5-alpha-L-arabinosidase A	GO:0004553//GO:0005975//GO:0046558	K06113	NA	IPR006710; Glycoside hydrolase, family 43//IPR016840; Glycoside hydrolase, family 43, endo-1, 5-alpha-L-arabinosidase//IPR023296; Glycosyl hydrolase family 43, five-bladed beta-propellor domain	NA		2
VEDA_07242	533	SEC	3.26±0.29	5.16e-58	para-nitrobenzyl esterase	NA	NA	NA	IPR002018; Carboxylesterase, type B	NA		9
VEDA_07278	716	SEC	12.88±1.04	5.73e-49	hypothetical protein	GO:0004553//GO:0005975	K01181	NA	IPR001137; Glycoside hydrolase, family 11//IPR006769; Coiled-coil domain containing protein 109, C-terminal//IPR008985; Concanavalin A-like lectin/glucanase//IPR013319; Glycoside hydrolase, family 11/12, catalytic domain//IPR018208; Glycoside hydrolase, family 11, active site	PHI:572//XYL2//AAC62815//Cochliobolus carbonum:NCBI_taxID=TX:5017//Unaffected pathogenicity		1
VEDA_07376	295	SEC	1.66±0.12	8.18e-29	hypothetical protein	NA	NA	NA	NA	NA	Y	8
VEDA_07382	1667	SEC	3.75±0.17	1.19e-125	hypothetical protein	NA	K00771	[BR:ko01003][PATH:ko00532][PATH:ko00534]	IPR002889; Carbohydrate-binding WSC//IPR011047; Quinonprotein alcohol dehydrogenase-like//IPR013994; Carbohydrate-binding WSC, subgroup	NA		48		Y
VEDA_07394	936	SEC	1.80±0.13	2.29e-15	serin endopeptidase	GO:0004252//GO:0005618//GO:0006508//GO:0016020	K14647	[BR:ko01002][BR:ko03110]	IPR000209; Peptidase S8/S53, subtilisin/kexin/sedolisin//IPR010435; Peptidase S8A, DUF1034 C-terminal//IPR015500; Peptidase S8, subtilisin-related//IPR022398; Peptidase S8, subtilisin, His-active site//IPR023827; Peptidase S8, subtilisin, Asp-active site//IPR023828; Peptidase S8, subtilisin, Ser-active site	NA		8
VEDA_07434	470		0.66±0.04	6.96e-25	citrate synthase	GO:0004108//GO:0006099//GO:0044262//GO:0046912	K01647	[PATH:ko00020][PATH:ko00630]	IPR002020; Citrate synthase-like//IPR010109; Citrate synthase, eukaryotic//IPR016141; Citrate synthase-like, core//IPR016142; Citrate synthase-like, large alpha subdomain//IPR019810; Citrate synthase active site	PHI:447//MCSA//CAI61947//Aspergillus fumigatus:NCBI_taxID=TX:5085//Reduced virulence		5
VEDA_07436	925		0.65±0.02	4.17e-41	plasma membrane ATPase	GO:0000166//GO:0003824//GO:0005524//GO:0006200//GO:0006754//GO:0006812//GO:0008152//GO:0015662//GO:0016020//GO:0016021//GO:0016887//GO:0046872	K01535	[PATH:ko00190]	IPR000695; ATPase, P-type, H+ transporting proton pump//IPR001757; ATPase, P-type, K/Mg/Cd/Cu/Zn/Na/Ca/Na/H-transporter//IPR004014; ATPase, P-type cation-transporter, N-terminal//IPR005834; Haloacid dehalogenase-like hydrolase//IPR006534; ATPase, P-type, plasma-membrane proton-efflux//IPR008250; ATPase, P-type, ATPase-associated domain//IPR018303; ATPase, P-type phosphorylation site//IPR023214; H…	NA		8
VEDA_07489	316		2.29±0.13	2.47e-14	hypothetical protein	NA	K11244	[PATH:ko04011]	IPR002889; Carbohydrate-binding WSC//IPR013994; Carbohydrate-binding WSC, subgroup	NA	Y	9
VEDA_07506	261	SEC	1.70±0.28	1.79e-08	spherulin-1A	GO:0030145//GO:0045735//GO:0048046	NA	NA	IPR001929; Germin//IPR006045; Cupin 1//IPR011051; Cupin, RmlC-type//IPR014710; RmlC-like jelly roll fold//IPR019780; Germin, manganese binding site	NA		4
VEDA_07512	420	SEC	2.12±0.13	2.74e-16	extracellular cell wall glucanase Crf1	GO:0004553//GO:0005975	K01238	NA	IPR000757; Glycoside hydrolase, family 16//IPR008985; Concanavalin A-like lectin/glucanase//IPR013320; Concanavalin A-like lectin/glucanase, subgroup	NA		3
VEDA_07516	222	SEC	2.19±0.17	1.25e-112	hypothetical protein	NA	NA	NA	NA	NA	Y	8
VEDA_07538	564		0.25±0.03	6.5e-14	zinc/iron transporter protein	GO:0016020//GO:0030001//GO:0046873//GO:0055085	K14709	NA	IPR003689; Zinc/iron permease	NA		13
VEDA_07554	479	SEC	10.14±0.80	0	mannan endo-1,4-beta-mannosidase	GO:0003824//GO:0005975//GO:0006080//GO:0008810//GO:0016985//GO:0030246//GO:0043169	K01218	[PATH:ko00051]	IPR000805; Glycoside hydrolase, family 26//IPR005084; Carbohydrate binding module family 6//IPR008979; Galactose-binding domain-like//IPR013781; Glycoside hydrolase, subgroup, catalytic domain//IPR017853; Glycoside hydrolase, superfamily//IPR022790; Endoglucanase H/Glycosyl hydrolase family 26	NA		5
VEDA_07591	535	SEC	8.35±0.52	2.29e-73	glycosyl hydrolase family 43 protein	GO:0004553//GO:0005975	K01238	NA	IPR006710; Glycoside hydrolase, family 43//IPR008985; Concanavalin A-like lectin/glucanase//IPR013320; Concanavalin A-like lectin/glucanase, subgroup//IPR023296; Glycosyl hydrolase family 43, five-bladed beta-propellor domain	NA		3
VEDA_07694	687	SEC	7.13±1.30	1.73e-09	alpha-L-rhamnosidase	GO:0003824	K12828	[PATH:ko03040][BR:ko03041]	IPR008902; Bacterial alpha-L-rhamnosidase//IPR008928; Six-hairpin glycosidase-like	NA		5
VEDA_07697	701		0.58±0.03	1.67e-65	heat shock protein	GO:0005524//GO:0006457//GO:0006950//GO:0051082	K04079	[BR:ko03110][PATH:ko04141][BR:ko03051][PATH:ko04621][PATH:ko04612][PATH:ko04914][PATH:ko04626][PATH:ko05200][PATH:ko05215]	IPR001404; Heat shock protein Hsp90//IPR003594; ATPase-like, ATP-binding domain//IPR019805; Heat shock protein Hsp90, conserved site//IPR020568; Ribosomal protein S5 domain 2-type fold//IPR020575; Heat shock protein Hsp90, N-terminal	PHI:463//HSP90//AAA02743//Saccharomyces cerevisiae:NCBI_taxID=TX:4932//Increased virulence (Hypervirulence)		1
VEDA_07737	298		1.95±0.33	7.21e-07	endonuclease/exonuclease/phosphatase family protein	NA	K06896	NA	IPR005135; Endonuclease/exonuclease/phosphatase	NA		4
VEDA_07777	474	NCSP	1.89±0.31	2.75e-07	acetylornithine aminotransferase	GO:0003824//GO:0008483//GO:0030170	K00843	NA	IPR005814; Aminotransferase class-III//IPR015421; Pyridoxal phosphate-dependent transferase, major region, subdomain 1//IPR015422; Pyridoxal phosphate-dependent transferase, major region, subdomain 2//IPR015424; Pyridoxal phosphate-dependent transferase, major domain	NA		10
VEDA_07796	334		0.59±0.05	8.22e-13	succinyl-CoA ligase subunit alpha	GO:0000166//GO:0003824//GO:0003878//GO:0004775//GO:0005488//GO:0008152	K01899	[PATH:ko00020][PATH:ko00640]	IPR003781; CoA-binding//IPR005810; Succinyl-CoA ligase, alpha subunit//IPR005811; ATP-citrate lyase/succinyl-CoA ligase//IPR016040; NAD(P)-binding domain//IPR016102; Succinyl-CoA synthetase-like//IPR017440; ATP-citrate lyase/succinyl-CoA ligase, active site	NA		3
VEDA_07800	403	SEC	2.80±0.25	2e-33	hypothetical protein	GO:0042122//GO:0042597//GO:0045135	NA	NA	IPR008397; Alginate lyase domain//IPR008929; Chondroitin AC/alginate lyase	NA		5
VEDA_07806	422	SEC	12.04±1.61	2.19e-183	beta-1,6-galactanase	GO:0003824//GO:0004553//GO:0005975//GO:0043169	NA	NA	IPR001547; Glycoside hydrolase, family 5//IPR013781; Glycoside hydrolase, subgroup, catalytic domain//IPR017853; Glycoside hydrolase, superfamily	NA		4
VEDA_07842	502		3.41±0.34	1.16e-81	tyrosinase	GO:0008152//GO:0016491	K00505	[PATH:ko00350][PATH:ko00740][PATH:ko00950][PATH:ko00965][PATH:ko04916]	IPR002227; Tyrosinase//IPR008922; Uncharacterised domain, di-copper centre	NA		7
VEDA_07870	535	SEC	1.56±0.14	4.68e-77	rhamnogalacturonase B	GO:0003824//GO:0005975//GO:0016837//GO:0030246	K06036	NA	IPR008979; Galactose-binding domain-like//IPR011013; Glycoside hydrolase-type carbohydrate-binding//IPR013784; Carbohydrate-binding-like fold//IPR015364; Rhamnogalacturonase B, N-terminal//IPR016590; Rhamnogalacturonase B	NA		4
VEDA_07914	656	SEC	5.59±0.45	3.1e-98	alpha-N-arabinofuranosidase A	GO:0046373//GO:0046556	K01209	[PATH:ko00520]	IPR010720; Alpha-L-arabinofuranosidase, C-terminal//IPR017853; Glycoside hydrolase, superfamily	NA		2
VEDA_07928	225	NCSP	1.81±0.19	3.8e-09	hypothetical protein	NA	NA	NA	IPR018871; GLEYA adhesin domain	NA		2
VEDA_07931	198	SEC	4.92±0.16	1.18e-21	PRY1 protein	GO:0005576	K15071	[BR:ko04121]	IPR001283; Allergen V5/Tpx-1-related//IPR014044; CAP domain//IPR018244; Allergen V5/Tpx-1-related, conserved site	PHI:184//RBT4//AAG09789//Candida albicans:NCBI_taxID=TX:5476//Reduced virulence		5
VEDA_07932	249	SEC	11.70±0.49	6.55e-35	acetylesterase	GO:0016787	K01170	NA	IPR013830; Esterase, SGNH hydrolase-type//IPR013831; Esterase, SGNH hydrolase-type, subgroup	NA		0
VEDA_08100	284		1.86±0.13	1.16e-10	S-formylglutathione hydrolase	GO:0004091//GO:0016023//GO:0018738	K01070	[PATH:ko00680]	IPR000801; Putative esterase//IPR014186; S-formylglutathione hydrolase	NA		2
VEDA_08300	1246		0.53±0.05	8.01e-06	eukaryotic translation initiation factor 3 135 kDa subunit	GO:0005488//GO:0005515	K03255	NA	IPR011990; Tetratricopeptide-like helical//IPR013026; Tetratricopeptide repeat-containing domain//IPR019734; Tetratricopeptide repeat//IPR023231; GSKIP/TIF31 domain	NA		12
VEDA_08393	270	SEC	7.51±2.09	1.47e-06	hypothetical protein	NA	NA	NA	NA	NA		2
VEDA_08409	377		2.13±0.28	4.73e-17	chitinase 18-4	GO:0003824//GO:0004553//GO:0004568//GO:0005975//GO:0006032//GO:0043169	K01183	[PATH:ko00520]	IPR001223; Glycoside hydrolase, family 18, catalytic domain//IPR011583; Chitinase II//IPR013781; Glycoside hydrolase, subgroup, catalytic domain//IPR017853; Glycoside hydrolase, superfamily	NA		3
VEDA_08424	228		0.65±0.02	2.6e-25	mitochondrial peroxiredoxin PRX1	GO:0016209//GO:0016491//GO:0051920//GO:0055114	K03386	NA	IPR000866; Alkyl hydroperoxide reductase subunit C/ Thiol specific antioxidant//IPR012336; Thioredoxin-like fold//IPR019479; Peroxiredoxin, C-terminal	PHI:386//TSA1//AAP68994//Cryptococcus neoformans:NCBI_taxID=TX:5207//Reduced virulence		1
VEDA_08452	377	SEC	1.70±0.14	4.86e-62	hypothetical protein	GO:0003824//GO:0005975//GO:0043169	NA	NA	IPR013781; Glycoside hydrolase, subgroup, catalytic domain//IPR017853; Glycoside hydrolase, superfamily//IPR024655; Uncharacterised protein family, glycosyl hydrolase catalytic domain	NA	Y	8
VEDA_08487	666	SEC	2.04±0.22	2.33e-18	lysophospholipase	GO:0004620//GO:0008152//GO:0009395	K13333	[PATH:ko00564]	IPR002642; Lysophospholipase, catalytic domain//IPR016035; Acyl transferase/acyl hydrolase/lysophospholipase	PHI:105//PLB1//AAC61890//Candida albicans:NCBI_taxID=TX:5476//Reduced virulence		8
VEDA_08522	552		0.57±0.03	6.12e-44	hypothetical protein	GO:0005515//GO:0005543	NA	NA	IPR001849; Pleckstrin homology domain//IPR011993; Pleckstrin homology-like domain	NA		0
VEDA_08569	462	SEC	6.00±0.67	8.26e-21	alpha-amylase A type-1/2	GO:0003824//GO:0004556//GO:0005509//GO:0005975//GO:0016052//GO:0043169	K01176	[PATH:ko00500][PATH:ko04973]	IPR006047; Glycosyl hydrolase, family 13, catalytic domain//IPR006589; Glycosyl hydrolase, family 13, subfamily, catalytic domain//IPR013781; Glycoside hydrolase, subgroup, catalytic domain//IPR015340; Alpha-amylase, domain of unknown function DUF1966, C-terminal//IPR015902; Alpha amylase//IPR017853; Glycoside hydrolase, superfamily	NA		6
VEDA_08571	608	SEC	4.54±0.75	5.23e-16	alcohol dehydrogenase	GO:0006066//GO:0008812//GO:0016614//GO:0050660//GO:0055114	K00108	[PATH:ko00260]	IPR000172; Glucose-methanol-choline oxidoreductase, N-terminal//IPR007867; Glucose-methanol-choline oxidoreductase, C-terminal//IPR012132; Glucose-methanol-choline oxidoreductase	NA		4
VEDA_08583	458	SEC	7.15±0.50	7.95e-75	exo-polygalacturonase	GO:0004650//GO:0005975	K01213	[PATH:ko00040][PATH:ko00500]	IPR000743; Glycoside hydrolase, family 28//IPR011050; Pectin lyase fold/virulence factor//IPR012334; Pectin lyase fold	PHI:115//PGX1//AAC26146//Cochliobolus carbonum:NCBI_taxID=TX:5017//Unaffected pathogenicity		14
VEDA_08592	336		1.66±0.24	3.37e-06	26S proteasome regulatory subunit rpn11	GO:0005515	K03030	[BR:ko01002][BR:ko04121][PATH:ko03050][BR:ko03051]	IPR000555; JAB1/Mov34/MPN/PAD-1//IPR024969; Rpn11/EIF3F C-terminal domain	NA		2
VEDA_08631	337		0.60±0.03	1.36e-08	thiosulfate sulfurtransferase	NA	K01011	[PATH:ko00270][PATH:ko04122]	IPR001763; Rhodanese-like	PHI:616//sseA//AAO68047//Salmonella enterica:NCBI_taxID=TX:216597//Reduced virulence		5
VEDA_08633	334	NCSP	0.50±0.09	1.42e-06	sedoheptulose-1,7-bisphosphatase	GO:0005975//GO:0042578	K01100	[PATH:ko00710]	IPR000146; Fructose-1,6-bisphosphatase class 1/Sedoheputulose-1,7-bisphosphatase//IPR023079; Sedoheptulose-1,7-bisphosphatase	NA		6
VEDA_08721	181	SEC	2.97±0.28	5.72e-06	hypothetical protein	NA	NA	NA	NA	NA	Y	8
VEDA_08739	365	SEC	4.29±0.61	6.81e-57	acetylxylan esterase	GO:0004553//GO:0005576//GO:0005975//GO:0030248	K01567	NA	IPR000254; Cellulose-binding domain, fungal//IPR010126; Esterase, PHB depolymerase	PHI:569//XYL3//AAC06239//Fusarium oxysporum:NCBI_taxID=TX:5507//Unaffected pathogenicity		11
VEDA_08741	671		0.56±0.02	2.08e-09	predicted protein	NA	NA	NA	NA	NA		3
VEDA_08790	630		4.57±0.24	6.92e-16	hypothetical protein	GO:0003824	NA	NA	IPR008928; Six-hairpin glycosidase-like	NA		1
VEDA_08813	395	SEC	6.00±0.56	2.49e-90	exoglucanase-6A	GO:0004553//GO:0005975//GO:0030245	K01238	NA	IPR001524; Glycoside hydrolase, family 6, conserved site//IPR016288; 1, 4-beta cellobiohydrolase	NA		5
VEDA_08818	232	SEC	3.31±0.14	3.43e-81	hypothetical protein	NA	NA	NA	NA	NA	Y	5
VEDA_08821	182		0.63±0.04	2.79e-49	peptidyl-prolyl cis-trans isomerase	GO:0003755//GO:0006457	K01802	NA	IPR002130; Cyclophilin-like peptidyl-prolyl cis-trans isomerase domain//IPR020892; Cyclophilin-type peptidyl-prolyl cis-trans isomerase, conserved site	PHI:277//BCP1//AAQ16572//Botrytis cinerea:NCBI_taxID=TX:40559//Reduced virulence		1
VEDA_08829	509		1.79±0.03	8.12e-06	hypothetical protein	NA	NA	NA	IPR018814; Uncharacterised protein family UPF0615	NA		2
VEDA_08836	534	SEC	7.57±0.72	7.54e-71	carboxylesterase	NA	K01066	[PATH:ko00960][PATH:ko00627][PATH:ko00363]	IPR002018; Carboxylesterase, type B//IPR019826; Carboxylesterase type B, active site	PHI:541//LIP1//AAU87359//Botrytis cinerea:NCBI_taxID=TX:332648//Unaffected pathogenicity		10
VEDA_08848	306	SEC	12.42±0.20	5.71e-21	pectate lyase	GO:0005576//GO:0030570	K01728	[PATH:ko00040]	IPR004898; Pectate lyase, catalytic//IPR011050; Pectin lyase fold/virulence factor//IPR012334; Pectin lyase fold	PHI:179//PELA//AAA33338//Nectria haematococca (related: Fusarium solani):NCBI_taxID=TX:140110//Reduced virulence		5
VEDA_08861	925	SEC	3.41±0.27	2.82e-07	yetA	NA	NA	NA	NA	NA		2
VEDA_08865	635	SEC	4.41±0.27	6.15e-156	glucoamylase	GO:0000272//GO:0003824//GO:0004339//GO:0004553//GO:0005976//GO:0030246//GO:2001070	K01178	[PATH:ko00500]	IPR000165; Glucoamylase//IPR002044; Carbohydrate binding module family 20//IPR008291; Glucoamylase, starch-binding//IPR008928; Six-hairpin glycosidase-like//IPR011613; Glycoside hydrolase family 15//IPR012341; Six-hairpin glycosidase//IPR013783; Immunoglobulin-like fold//IPR013784; Carbohydrate-binding-like fold//IPR015902; Alpha amylase	NA		10
VEDA_08867	842	SEC	10.84±0.79	0	alpha-glucuronidase	GO:0003824//GO:0005576//GO:0005975//GO:0043169//GO:0045493//GO:0046559	K01235	NA	IPR005154; Glycoside hydrolase, family 67, alpha glucuronidase, N-terminal//IPR011099; Glycosyl hydrolase 67, C-terminal//IPR011100; Glycosyl hydrolase 67 middle//IPR011395; Glycoside hydrolase, family 67, alpha glucuronidase//IPR013781; Glycoside hydrolase, subgroup, catalytic domain//IPR017853; Glycoside hydrolase, superfamily	NA		2
VEDA_08886	284		1.91±0.12	9.81e-37	hypothetical protein	GO:0006629//GO:0016787//GO:0016788	NA	NA	IPR001087; Lipase, GDSL//IPR013830; Esterase, SGNH hydrolase-type//IPR013831; Esterase, SGNH hydrolase-type, subgroup	NA	Y	5
VEDA_08911	542	SEC	11.99±2.85	2.26e-39	exoglucanase	GO:0004553//GO:0005576//GO:0005975//GO:0030248	K01238	NA	IPR000254; Cellulose-binding domain, fungal//IPR001722; Glycoside hydrolase, family 7//IPR008985; Concanavalin A-like lectin/glucanase	PHI:566//cel2//AAK19621//Cochliobolus carbonum:NCBI_taxID=TX:5017//Unaffected pathogenicity		24
VEDA_08919	284	SEC	3.41±0.35	5.44e-06	Axe2	GO:0008152//GO:0016787	K01567	NA	IPR000675; Cutinase	NA		6
VEDA_08934	394		0.65±0.05	4.4e-12	GTP-dependent nucleic acid-binding protein engD	GO:0005525	K06942	NA	IPR004396; Conserved hypothetical protein CHP00092//IPR006073; GTP binding domain//IPR012675; Beta-grasp domain//IPR012676; TGS-like//IPR013029; Domain of unknown function DUF933//IPR023192; TGS-like domain	NA		2
VEDA_09003	426	SEC	5.87±0.93	0	endo-1,4-beta-xylanase Z	GO:0003824//GO:0004553//GO:0005576//GO:0005975//GO:0030248//GO:0043169	K01181	NA	IPR000254; Cellulose-binding domain, fungal//IPR001000; Glycoside hydrolase, family 10//IPR013781; Glycoside hydrolase, subgroup, catalytic domain//IPR017853; Glycoside hydrolase, superfamily	PHI:568//XYL2 (related: XYN33)//AAC41684//Magnaporthe grisea:NCBI_taxID=TX:148305//Unaffected pathogenicity		8
VEDA_09015	342	SEC	9.61±1.42	2.26e-112	hypothetical protein	NA	NA	NA	IPR018871; GLEYA adhesin domain	NA	Y	8
VEDA_09016	448	SEC	5.98±0.48	6.79e-61	glycosyl hydrolase family 43 protein	GO:0004553//GO:0005975	K09955	NA	IPR006710; Glycoside hydrolase, family 43//IPR008979; Galactose-binding domain-like//IPR023296; Glycosyl hydrolase family 43, five-bladed beta-propellor domain	NA		4
VEDA_09144	453		1.56±0.01	5.37e-06	methionine gamma-lyase	GO:0003824//GO:0006520//GO:0030170	K01760	[PATH:ko00910][PATH:ko00920][PATH:ko00270][PATH:ko00450]	IPR000277; Cys/Met metabolism, pyridoxal phosphate-dependent enzyme//IPR015421; Pyridoxal phosphate-dependent transferase, major region, subdomain 1//IPR015422; Pyridoxal phosphate-dependent transferase, major region, subdomain 2//IPR015424; Pyridoxal phosphate-dependent transferase, major domain	NA		4
VEDA_09152	94		0.64±0.04	8.31e-07	hypothetical protein	GO:0000276//GO:0015078//GO:0015986	NA	NA	IPR008386; ATPase, F0 complex, subunit E, mitochondrial	NA		0
VEDA_09206	461		0.64±0.05	1.08e-12	FK506-binding protein	GO:0006457	K14826	[BR:ko03009]	IPR001179; Peptidyl-prolyl cis-trans isomerase, FKBP-type, domain//IPR023566; Peptidyl-prolyl cis-trans isomerase, FKBP-type	PHI:548//BcPIC5//ABA25866//Botrytis cinerea:NCBI_taxID=TX:40559//Reduced virulence		0
VEDA_09294	341	SEC	2.26±0.06	1.65e-55	alpha/beta hydrolase	NA	K01259	[PATH:ko00330][BR:ko01002]	IPR000073; Alpha/beta hydrolase fold-1	NA		4
VEDA_09328	505		0.66±0.04	8.26e-59	disulfide-isomerase	GO:0005783//GO:0006662//GO:0009055//GO:0015035//GO:0016853//GO:0045454	K09580	[BR:ko03110][PATH:ko04141]	IPR005746; Thioredoxin//IPR005788; Disulphide isomerase//IPR005792; Protein disulphide isomerase//IPR012336; Thioredoxin-like fold//IPR013766; Thioredoxin domain//IPR017937; Thioredoxin, conserved site	NA		7
VEDA_09336	682	SEC	8.99±0.86	8.03e-28	periplasmic trehalase	GO:0003824//GO:0004555//GO:0005991	K01194	[PATH:ko00500]	IPR001661; Glycoside hydrolase, family 37//IPR008928; Six-hairpin glycosidase-like//IPR018232; Glycoside hydrolase, family 37, conserved site	NA		6
VEDA_09346	874		1.56±0.13	1.35e-10	aminopeptidase	GO:0006508//GO:0008237//GO:0008270	K13721	[BR:ko01002]	IPR001930; Peptidase M1, alanine aminopeptidase/leukotriene A4 hydrolase//IPR014782; Peptidase M1, membrane alanine aminopeptidase, N-terminal//IPR024571; Domain of unknown function DUF3358	NA		6
VEDA_09353	443	SEC	2.33±0.12	3.76e-52	septation protein SUN4	NA	K01238	NA	IPR005556; SUN	NA		11
VEDA_09376	412		0.65±0.06	5.16e-27	argininosuccinate synthase	GO:0004055//GO:0005524//GO:0006526	K01940	[PATH:ko00250][PATH:ko00330]	IPR001518; Argininosuccinate synthase//IPR014729; Rossmann-like alpha/beta/alpha sandwich fold//IPR018223; Argininosuccinate synthase, conserved site//IPR023434; Argininosuccinate synthase, type 1 subfamily//IPR024074; Argininosuccinate synthetase, catalytic/multimerisation domain body	NA		8
VEDA_09382	668	SEC	7.87±0.57	0	rhamnogalacturonan lyase	GO:0003824//GO:0005975//GO:0030246	NA	NA	IPR008979; Galactose-binding domain-like//IPR011013; Glycoside hydrolase-type carbohydrate-binding//IPR013784; Carbohydrate-binding-like fold	NA		4
VEDA_09412	2516	SEC	11.12±0.95	5.9e-30	pectinesterase	GO:0005618//GO:0030599//GO:0042545	K01051	[PATH:ko00040][PATH:ko00500]	IPR000070; Pectinesterase, catalytic//IPR011050; Pectin lyase fold/virulence factor//IPR012334; Pectin lyase fold	PHI:1028//bcpme1//CAC29255//Botrytis cinerea:NCBI_taxID=TX:40559//Reduced virulence		19
VEDA_09427	413		1.51±0.14	2.03e-10	arg-6	GO:0000166//GO:0003942//GO:0005737//GO:0006520//GO:0006526//GO:0016620//GO:0051287//GO:0055114	K12659	[PATH:ko00330]	IPR000534; Semialdehyde dehydrogenase, NAD-binding//IPR000706; N-acetyl-gamma-glutamyl-phosphate reductase, type 1//IPR016040; NAD(P)-binding domain//IPR023013; N-acetyl-gamma-glutamyl-phosphate reductase, active site	NA		5
VEDA_09538	516	SEC	0.53±0.09	6.38e-08	LysM domain-containing protein	GO:0016998	K01183	[PATH:ko00520]	IPR002482; Peptidoglycan-binding Lysin subgroup//IPR018392; Peptidoglycan-binding lysin domain	NA		24
VEDA_09566	620	SEC	5.22±0.50	5.63e-38	choline dehydrogenase	GO:0006066//GO:0008812//GO:0016614//GO:0050660//GO:0055114	K00108	[PATH:ko00260]	IPR000172; Glucose-methanol-choline oxidoreductase, N-terminal//IPR007867; Glucose-methanol-choline oxidoreductase, C-terminal//IPR012132; Glucose-methanol-choline oxidoreductase	PHI:922//um03615////Ustilago maydis:NCBI_taxID=TX:5270//Unaffected pathogenicity		1
VEDA_09610	370	SEC	4.36±0.51	4.99e-07	phosphoglycerate mutase family protein	NA	NA	NA	IPR013078; Histidine phosphatase superfamily, clade-1	NA		8
VEDA_09719	548	SEC	4.17±0.41	1.31e-51	DUF1237 domain-containing protein	GO:0003824	K09704	NA	IPR008313; Uncharacterised conserved protein UCP028846//IPR008928; Six-hairpin glycosidase-like//IPR012341; Six-hairpin glycosidase	PHI:785//MGG_04128//EDJ99431//Magnaporthe grisea:NCBI_taxID=TX:148305//Reduced virulence		5
VEDA_09734	746	SEC	4.24±0.33	7.87e-38	thermostable beta-glucosidase B	GO:0004553//GO:0005975	K05349	[PATH:ko00500][PATH:ko00460][PATH:ko00940]	IPR001764; Glycoside hydrolase, family 3, N-terminal//IPR002772; Glycoside hydrolase family 3 C-terminal domain//IPR017853; Glycoside hydrolase, superfamily	PHI:748//um00446//Not available//Ustilago maydis:NCBI_taxID=TX:5270//Unaffected pathogenicity		8
VEDA_09744	345	SEC	10.96±0.21	3.48e-129	endo-1,4-beta-xylanase	GO:0003824//GO:0004553//GO:0005975//GO:0043169	K01181	NA	IPR001000; Glycoside hydrolase, family 10//IPR013781; Glycoside hydrolase, subgroup, catalytic domain//IPR017853; Glycoside hydrolase, superfamily	PHI:568//XYL2 (related: XYN33)//AAC41684//Magnaporthe grisea:NCBI_taxID=TX:148305//Unaffected pathogenicity		5
